# Supplementary material for: A genetic screen in macrophages identifies new regulators of IFNγ-inducible MHCII that contribute to T cell activation
Source: eLife. 2021 Nov 8;10:e65110. doi: 10.7554/eLife.65110 (PMC8598162; doi:10.7554/eLife.65110)
Supplement: Figure 5—source data 1. [file elife-65110-fig5-data1.xlsx]

## Sheet: Normalized Counts
	Symbol	NTC_US	NTC_US	NTC_US	NTC_IFNg	NTC_IFNg	NTC_IFNg	Gsk3b_US	Gsk3b_US	Gsk3b_US	Gsk3b_IFNg	Gsk3b_IFNg	Gsk3b_IFNg	Med16_US	Med16_US	Med16_US	Med16_IFNg	Med16_IFNg	Med16_IFNg
ENSMUSG00000109644	0610005C13Rik	34	20	32	29	45	41	26	29	24	29	16	24	41	32	25	42	41	28
ENSMUSG00000007777	0610009B22Rik	446	373	459	373	586	367	359	414	512	413	449	455	836	567	424	414	415	439
ENSMUSG00000086714	0610009E02Rik	11	12	12	33	69	42	5	4	5	7	13	5	13	11	6	15	11	10
ENSMUSG00000043644	0610009L18Rik	7	5	11	12	9	1	7	7	11	11	11	5	20	11	13	11	5	8
ENSMUSG00000042208	0610010F05Rik	1300	1238	1396	1344	2198	1264	1067	1206	1337	1034	982	1210	1691	971	973	1144	1177	1180
ENSMUSG00000020831	0610010K14Rik	654	568	664	946	1311	797	474	531	614	448	444	417	949	725	518	606	702	664
ENSMUSG00000107002	0610012G03Rik	696	597	679	740	1071	683	586	731	781	827	671	780	1048	672	547	566	692	657
ENSMUSG00000058706	0610030E20Rik	990	952	1027	1192	1769	1094	729	853	850	779	735	940	1311	797	735	870	870	803
ENSMUSG00000099146	0610031O16Rik	0	2	2	2	3	5	4	1	2	5	1	4	7	4	2	1	7	3
ENSMUSG00000097882	0610038B21Rik	42	31	61	54	68	39	25	24	21	35	34	25	66	46	48	44	37	37
ENSMUSG00000058812	0610039K10Rik	8	0	6	11	16	25	1	3	5	23	9	4	12	8	6	7	7	5
ENSMUSG00000089889	0610040B10Rik	20	31	30	21	34	36	24	16	34	32	27	38	69	32	39	37	34	16
ENSMUSG00000087341	0610040F04Rik	0	1	0	2	0	0	0	0	0	0	0	0	0	0	0	0	0	3
ENSMUSG00000060512	0610040J01Rik	7	7	7	8	19	6	5	6	6	1	0	5	9	2	8	1	2	6
ENSMUSG00000087361	0610043K17Rik	0	0	0	1	2	1	0	0	0	4	1	0	1	1	2	4	2	3
ENSMUSG00000097222	1010001N08Rik	0	0	1	0	0	0	0	0	1	0	0	0	0	1	0	0	1	0
ENSMUSG00000090066	1110002E22Rik	6	5	5	45	60	33	1	4	0	30	28	37	24	7	14	11	6	9
ENSMUSG00000071456	1110002L01Rik	1214	1082	1236	990	1564	944	1101	1173	1299	798	820	936	1832	1316	1079	994	1013	1007
ENSMUSG00000030663	1110004F10Rik	4792	4618	5278	4694	7344	4186	4240	4586	5034	3684	3438	3959	8231	5340	4446	4693	4998	4790
ENSMUSG00000107121	1110006O24Rik	19	20	13	28	21	17	13	14	16	21	10	23	19	25	14	21	25	9
ENSMUSG00000039195	1110008P14Rik	469	400	485	579	800	477	1156	1260	1502	1708	1427	1749	1075	752	564	813	892	851
ENSMUSG00000045237	1110012L19Rik	251	224	264	212	331	185	181	218	239	199	182	265	405	262	191	223	201	207
ENSMUSG00000098659	1110015O18Rik	0	0	0	0	0	0	0	0	0	0	0	0	0	0	0	0	0	0
ENSMUSG00000028441	1110017D15Rik	2	0	2	0	1	6	0	1	2	1	1	2	6	3	0	3	0	2
ENSMUSG00000097616	1110019D14Rik	106	109	131	82	99	81	101	135	163	93	72	83	284	196	159	121	122	115
ENSMUSG00000097047	1110020A21Rik	3	4	6	18	12	4	6	7	14	9	10	10	24	11	13	5	5	0
ENSMUSG00000068073	1110025L11Rik	0	0	0	0	0	0	0	0	0	0	0	0	0	0	0	0	0	0
ENSMUSG00000099139	1110028F18Rik	0	0	0	0	0	0	0	0	0	0	0	0	0	0	0	0	0	0
ENSMUSG00000037971	1110032A03Rik	111	127	151	100	180	103	92	109	108	98	84	114	220	147	113	109	110	115
ENSMUSG00000046999	1110032F04Rik	0	0	0	0	0	0	0	0	0	0	0	0	0	0	0	0	0	0
ENSMUSG00000092203	1110038B12Rik	1852	1664	1990	1806	2833	1535	1725	1866	2110	1279	1096	1385	3301	2447	1914	1879	1931	2011
ENSMUSG00000063236	1110038F14Rik	615	557	657	928	1388	836	481	582	659	726	689	777	937	678	518	843	852	809
ENSMUSG00000085457	1110046J04Rik	31	27	37	30	62	34	21	25	35	60	60	69	36	23	33	21	30	20
ENSMUSG00000040591	1110051M20Rik	215	190	239	219	306	213	161	172	206	147	109	134	353	243	201	170	189	158
ENSMUSG00000035171	1110059E24Rik	855	798	970	1011	1568	831	677	745	891	687	644	790	1397	930	693	973	974	996
ENSMUSG00000032551	1110059G10Rik	379	320	427	439	616	353	297	356	401	319	321	377	616	357	325	366	387	395
ENSMUSG00000078570	1110065P20Rik	289	277	336	326	460	289	240	258	292	299	253	298	535	398	303	322	348	335
ENSMUSG00000043687	1190005I06Rik	95	72	109	39	86	36	119	109	106	112	92	148	145	136	91	67	78	67
ENSMUSG00000063320	1190007I07Rik	288	263	294	265	435	221	219	227	247	211	185	214	476	309	248	233	246	252
ENSMUSG00000110013	1190028D05Rik	0	1	2	2	0	0	1	0	0	0	0	0	4	1	3	1	6	6
ENSMUSG00000097290	1300002E11Rik	82	84	89	83	159	88	86	84	94	124	104	126	122	59	70	51	34	41
ENSMUSG00000033688	1300017J02Rik	37	35	48	42	57	48	27	43	40	38	37	43	41	41	27	60	57	45
ENSMUSG00000098912	1500004A13Rik	230	276	300	221	432	228	166	196	185	144	130	167	563	396	348	303	322	243
ENSMUSG00000068099	1500009C09Rik	0	0	0	0	0	0	0	0	0	0	0	0	0	0	0	0	0	0
ENSMUSG00000087651	1500009L16Rik	0	0	0	0	0	0	0	0	0	0	0	0	0	0	0	0	0	0
ENSMUSG00000072694	1500011B03Rik	706	720	810	1228	1770	1125	527	572	658	1315	1141	1343	1370	978	818	1044	1179	1129
ENSMUSG00000097247	1500012K07Rik	0	0	0	0	0	0	0	1	0	0	0	0	1	0	1	1	0	0
ENSMUSG00000098702	1500015A07Rik	112	113	124	100	181	100	69	83	93	92	70	77	192	106	129	82	90	94
ENSMUSG00000094732	1500015L24Rik	0	0	0	0	0	0	0	0	0	0	0	0	0	0	0	0	0	0
ENSMUSG00000097383	1500026H17Rik	4	4	1	6	7	4	7	2	3	3	4	6	13	1	4	1	3	1
ENSMUSG00000059631	1500035N22Rik	0	0	0	0	0	0	0	0	1	0	0	0	0	0	1	0	0	0
ENSMUSG00000043747	1520401A03Rik	3	2	0	2	7	4	0	7	2	8	9	5	3	3	1	1	4	3
ENSMUSG00000117232	1600002D24Rik	4	3	2	7	7	5	8	3	4	5	6	6	5	3	5	6	3	0
ENSMUSG00000035595	1600002K03Rik	199	165	175	159	296	168	240	237	264	178	169	203	431	313	227	253	284	310
ENSMUSG00000101585	1600010M07Rik	24	18	21	12	28	17	57	51	54	86	66	78	43	39	30	15	14	15
ENSMUSG00000050088	1600012H06Rik	587	558	640	723	955	670	690	700	752	888	776	974	1008	695	564	614	698	633
ENSMUSG00000047661	1600012P17Rik	0	0	0	0	0	0	0	0	0	0	0	0	0	0	0	1	0	0
ENSMUSG00000054676	1600014C10Rik	481	484	494	685	1031	653	345	366	402	537	438	541	948	707	529	819	899	809
ENSMUSG00000094690	1600014C23Rik	4	4	2	4	3	2	1	1	1	9	8	4	2	1	0	1	1	1
ENSMUSG00000099429	1600019K03Rik	0	0	0	0	0	0	0	0	1	0	0	1	0	0	0	0	0	0
ENSMUSG00000097048	1600020E01Rik	94	101	95	85	160	94	132	116	106	95	114	118	212	148	114	126	119	117
ENSMUSG00000104986	1600023N17Rik	3	7	6	9	10	4	5	1	1	7	1	7	4	7	2	4	3	4
ENSMUSG00000085114	1600025M17Rik	0	0	0	0	0	0	0	0	0	0	0	0	0	0	0	0	0	0
ENSMUSG00000110340	1600027J07Rik	0	0	0	0	0	0	0	0	0	0	0	0	0	0	0	0	0	0
ENSMUSG00000046242	1600029I14Rik	0	0	0	0	0	0	0	0	0	0	0	0	0	0	0	0	0	0
ENSMUSG00000057818	1600029O15Rik	0	1	0	0	1	0	1	1	1	0	0	4	5	2	3	1	1	0
ENSMUSG00000029182	1700001C02Rik	0	0	0	0	0	0	0	0	0	0	0	0	0	0	0	0	0	0
ENSMUSG00000047150	1700001C19Rik	1	1	0	1	0	1	1	0	0	1	1	1	1	2	2	2	3	2
ENSMUSG00000099419	1700001D01Rik	0	0	0	0	0	0	0	0	0	0	0	0	0	0	0	0	0	0
ENSMUSG00000095384	1700001F09Rik	0	0	0	0	0	0	0	0	0	0	0	0	0	0	0	0	0	0
ENSMUSG00000087170	1700001G01Rik	0	0	0	0	0	0	0	0	0	0	0	0	0	0	0	0	0	0
ENSMUSG00000085984	1700001G11Rik	14	10	11	13	8	12	8	4	8	8	13	9	10	17	12	12	12	11
ENSMUSG00000103746	1700001G17Rik	4	2	5	4	14	6	4	4	5	1	1	2	7	7	2	5	1	2
ENSMUSG00000095040	1700001J03Rik	0	0	0	0	0	1	0	1	2	1	0	0	0	2	0	0	0	0
ENSMUSG00000086135	1700001J04Rik	0	0	0	0	0	0	0	0	0	0	0	0	0	0	0	0	0	0
ENSMUSG00000101963	1700001J11Rik	0	2	1	0	0	1	1	0	0	0	0	0	0	2	0	2	0	1
ENSMUSG00000056508	1700001K19Rik	0	1	1	0	8	0	0	0	4	0	1	0	1	0	2	1	0	0
ENSMUSG00000118314	1700001K23Rik	7	14	10	8	7	10	5	4	1	2	4	4	17	4	2	6	2	3
ENSMUSG00000021534	1700001L19Rik	2	0	1	1	3	2	0	0	0	0	0	0	0	0	0	0	0	0
ENSMUSG00000044320	1700001O22Rik	1	4	5	2	8	5	4	2	0	6	4	5	3	2	2	3	2	2
ENSMUSG00000018543	1700001P01Rik	1	1	1	0	2	1	0	0	3	1	0	1	0	1	0	1	0	0
ENSMUSG00000099391	1700003C15Rik	0	0	0	0	0	0	0	0	0	0	0	0	0	0	0	0	0	0
ENSMUSG00000085944	1700003D09Rik	0	0	0	0	0	0	0	0	0	0	0	0	0	0	1	0	0	0
ENSMUSG00000030030	1700003E16Rik	33	34	37	45	47	28	22	18	25	45	24	51	36	24	17	17	23	15
ENSMUSG00000095110	1700003E24Rik	0	0	0	0	0	0	0	0	0	0	0	0	0	0	0	0	0	0
ENSMUSG00000038523	1700003F12Rik	64	71	87	43	65	44	79	83	102	132	100	127	120	82	59	45	54	46
ENSMUSG00000087621	1700003G18Rik	0	0	0	0	2	1	1	2	0	0	0	0	3	1	0	0	1	0
ENSMUSG00000039174	1700003H04Rik	0	0	0	0	0	0	0	0	0	0	0	0	0	0	0	0	0	0
ENSMUSG00000100372	1700003I22Rik	0	0	0	0	0	0	0	0	0	0	0	0	0	0	0	0	0	0
ENSMUSG00000101565	1700003L19Rik	0	0	0	0	0	0	0	0	2	0	0	0	0	0	0	0	0	0
ENSMUSG00000100727	1700003P14Rik	0	0	0	0	0	0	0	0	0	0	0	0	0	0	0	0	0	0
ENSMUSG00000027973	1700006A11Rik	0	0	0	0	0	0	0	0	0	0	0	0	0	0	0	0	0	0
ENSMUSG00000100274	1700006F04Rik	0	0	0	0	0	0	0	0	0	0	0	0	0	0	0	0	0	0
ENSMUSG00000102000	1700006H21Rik	0	1	0	0	0	0	0	0	0	0	0	1	1	0	0	0	0	0
ENSMUSG00000100666	1700007F19Rik	0	0	0	0	0	0	0	0	0	0	0	0	0	0	0	0	0	0
ENSMUSG00000086330	1700007J10Rik	0	0	1	1	1	0	0	0	0	1	0	0	1	1	0	0	0	1
ENSMUSG00000026831	1700007K13Rik	0	0	0	0	1	3	0	0	0	0	0	0	0	0	0	0	0	0
ENSMUSG00000097318	1700007L15Rik	69	48	82	74	100	54	73	83	91	66	55	55	150	109	79	52	56	47
ENSMUSG00000089730	1700007P06Rik	0	0	0	0	0	0	0	0	0	0	0	0	0	0	0	0	0	0
ENSMUSG00000111986	1700008C04Rik	0	0	0	0	0	0	0	0	0	1	0	0	0	0	0	0	2	0
ENSMUSG00000101225	1700008J07Rik	42	60	53	61	69	37	37	34	34	27	30	38	85	76	59	62	42	67
ENSMUSG00000101012	1700008K24Rik	0	0	0	0	0	0	0	0	0	0	0	0	0	0	0	0	0	0
ENSMUSG00000008028	1700008O03Rik	46	26	48	31	40	12	15	38	29	26	15	27	34	26	21	13	13	31
ENSMUSG00000069118	1700008P02Rik	0	0	0	0	0	0	0	0	0	0	0	0	0	0	0	0	0	0
ENSMUSG00000101404	1700009C05Rik	0	0	0	0	0	0	0	0	0	0	0	0	0	0	0	0	0	0
ENSMUSG00000096573	1700009J07Rik	0	0	0	1	0	0	0	0	0	0	0	0	0	0	0	0	0	0
ENSMUSG00000028287	1700009N14Rik	0	0	0	0	0	0	0	0	0	0	0	0	0	0	0	0	0	0
ENSMUSG00000057047	1700010B08Rik	0	0	0	0	1	0	0	0	0	0	0	0	0	0	0	0	0	0
ENSMUSG00000071721	1700010D01Rik	0	0	0	0	0	0	0	0	0	0	0	0	0	0	0	0	0	0
ENSMUSG00000100010	1700010I02Rik	0	0	0	0	0	0	0	0	0	0	0	0	0	0	0	0	0	0
ENSMUSG00000023873	1700010I14Rik	92	110	116	112	168	90	111	120	106	110	116	146	175	110	95	106	100	90
ENSMUSG00000100314	1700010J16Rik	0	0	0	0	0	0	0	0	0	0	0	0	0	0	0	0	0	0
ENSMUSG00000092599	1700010K23Rik	0	0	0	0	0	0	0	0	0	0	0	0	0	0	0	0	0	0
ENSMUSG00000030636	1700010L04Rik	0	0	0	0	1	1	0	0	0	0	0	1	0	0	1	0	0	0
ENSMUSG00000101855	1700010N08Rik	0	0	0	0	0	0	0	0	0	0	0	0	0	0	0	0	0	0
ENSMUSG00000102099	1700011B04Rik	0	0	0	1	0	1	2	0	0	0	0	0	1	0	0	0	0	1
ENSMUSG00000108800	1700011C11Rik	0	0	0	0	0	0	0	0	0	0	0	0	0	0	0	0	0	0
ENSMUSG00000031682	1700011L22Rik	0	0	0	0	0	0	0	1	0	0	0	1	0	0	0	0	0	0
ENSMUSG00000079476	1700011M02Rik	0	0	0	0	0	0	0	0	0	0	0	0	0	0	0	0	0	0
ENSMUSG00000029766	1700012A03Rik	0	0	0	0	0	0	0	0	0	0	0	0	0	0	0	0	0	0
ENSMUSG00000020617	1700012B07Rik	0	0	1	0	1	1	0	0	0	0	1	0	0	0	0	0	0	0
ENSMUSG00000031927	1700012B09Rik	0	0	0	0	0	0	0	0	0	0	0	0	0	0	0	0	0	0
ENSMUSG00000085470	1700012C14Rik	0	0	0	0	0	0	0	0	0	0	0	0	0	0	0	0	0	0
ENSMUSG00000040195	1700012D01Rik	1499	1410	1564	1996	3039	1851	853	992	915	996	900	1139	1768	984	991	1281	1208	1197
ENSMUSG00000110424	1700012D14Rik	31	33	22	20	38	13	16	19	12	12	11	18	33	19	21	15	23	15
ENSMUSG00000105023	1700012D16Rik	0	0	0	0	0	0	0	0	0	0	0	0	0	0	0	0	0	0
ENSMUSG00000102069	1700012I11Rik	0	0	0	0	0	0	0	0	0	0	0	0	0	0	0	0	0	0
ENSMUSG00000028589	1700012P22Rik	0	0	0	0	0	0	0	0	0	0	0	0	0	0	0	0	0	0
ENSMUSG00000027886	1700013F07Rik	3	1	2	6	3	4	0	0	0	2	6	3	0	0	2	1	0	3
ENSMUSG00000041399	1700013G24Rik	0	0	0	0	0	0	0	0	0	0	0	0	0	0	0	0	0	0
ENSMUSG00000054727	1700013H16Rik	0	0	0	0	0	0	0	0	0	0	0	0	0	0	0	0	0	0
ENSMUSG00000051054	1700014D04Rik	1	1	0	1	1	2	1	3	1	1	0	0	1	1	1	2	2	1
ENSMUSG00000079666	1700015F17Rik	0	0	0	1	0	0	0	0	0	1	2	0	2	0	0	0	0	2
ENSMUSG00000094445	1700015G11Rik	0	0	0	0	0	0	0	0	0	0	0	0	0	0	0	0	0	0
ENSMUSG00000102737	1700016A09Rik	5	3	4	5	8	4	4	1	2	4	6	6	2	3	4	2	1	2
ENSMUSG00000104538	1700016B01Rik	0	0	0	0	0	0	0	0	0	0	0	0	0	0	0	0	0	0
ENSMUSG00000015962	1700016C15Rik	3	3	4	1	0	0	3	3	2	0	0	1	17	18	11	1	3	0
ENSMUSG00000031509	1700016D06Rik	0	0	0	0	0	0	0	0	0	0	0	0	0	0	0	0	0	0
ENSMUSG00000100625	1700016G22Rik	0	0	0	0	0	0	0	0	0	0	0	1	0	0	0	0	0	0
ENSMUSG00000029320	1700016H13Rik	0	0	0	0	0	0	0	0	0	0	0	0	0	0	0	0	0	0
ENSMUSG00000114563	1700016K05Rik	0	0	0	0	0	0	0	0	0	0	0	0	0	0	0	0	0	0
ENSMUSG00000053783	1700016K19Rik	4	2	4	3	0	1	0	1	3	0	2	2	1	2	1	1	0	4
ENSMUSG00000101483	1700016L21Rik	0	0	0	0	0	0	0	0	0	0	0	0	0	0	0	0	0	0
ENSMUSG00000101894	1700016P04Rik	0	0	0	0	0	0	0	0	0	0	0	0	0	0	0	0	0	0
ENSMUSG00000032300	1700017B05Rik	4862	4442	5011	3803	5902	3486	4505	5346	5616	3942	3419	4385	8509	6001	4918	4685	4538	4361
ENSMUSG00000037884	1700017G19Rik	2	1	1	6	6	2	5	6	2	2	0	1	6	2	2	3	2	4
ENSMUSG00000086348	1700017J07Rik	0	0	0	0	0	0	0	0	0	0	0	0	0	0	0	0	0	0
ENSMUSG00000107232	1700017L05Rik	0	0	0	0	0	0	0	0	0	0	0	0	0	0	0	0	0	0
ENSMUSG00000105651	1700017M07Rik	1	0	0	0	0	0	7	3	4	16	16	30	0	0	0	0	1	0
ENSMUSG00000056912	1700017N19Rik	0	0	0	0	0	0	0	0	0	0	0	0	0	0	0	0	0	0
ENSMUSG00000038408	1700018A04Rik	0	0	0	0	0	0	0	0	0	0	0	0	0	0	0	0	0	0
ENSMUSG00000031809	1700018B08Rik	0	1	0	1	1	0	1	1	0	0	2	3	0	2	0	0	0	0
ENSMUSG00000029620	1700018F24Rik	0	2	4	0	4	2	7	2	10	11	7	21	0	0	4	4	2	0
ENSMUSG00000109745	1700018G05Rik	0	0	0	0	0	0	0	0	0	0	0	0	0	0	0	0	0	0
ENSMUSG00000060715	1700019A02Rik	0	1	0	2	0	0	0	0	2	2	0	0	1	0	0	1	0	0
ENSMUSG00000113770	1700019C18Rik	0	1	0	0	0	0	0	0	0	0	0	0	0	0	0	0	0	0
ENSMUSG00000043629	1700019D03Rik	3	4	3	0	13	5	1	5	0	6	5	8	10	0	3	2	2	8
ENSMUSG00000086202	1700019E08Rik	0	0	0	0	0	0	0	0	0	0	0	0	0	0	0	0	0	0
ENSMUSG00000107027	1700019F05Rik	0	0	0	0	0	0	0	0	0	0	0	0	0	0	0	0	0	0
ENSMUSG00000085416	1700019G24Rik	0	0	0	0	0	0	0	0	0	0	0	0	0	0	0	0	0	0
ENSMUSG00000111489	1700019J19Rik	0	0	0	0	0	0	0	0	0	0	0	0	1	0	0	0	0	1
ENSMUSG00000026931	1700019N19Rik	0	0	0	0	0	0	0	0	0	0	0	0	0	0	0	0	0	0
ENSMUSG00000099808	1700019P21Rik	0	0	0	0	0	0	0	0	0	0	0	0	0	0	0	0	0	0
ENSMUSG00000027409	1700020A23Rik	0	1	0	1	2	1	0	3	2	1	0	2	5	1	0	0	0	1
ENSMUSG00000100937	1700020D05Rik	11	19	11	20	32	13	13	9	7	10	6	9	14	11	15	11	15	18
ENSMUSG00000101796	1700020D14Rik	0	0	0	0	0	0	0	0	0	0	0	0	0	0	0	0	0	0
ENSMUSG00000101801	1700020G17Rik	0	0	1	0	0	0	0	0	0	0	0	0	0	0	0	0	0	0
ENSMUSG00000035085	1700020L24Rik	11	10	3	6	10	4	2	5	5	4	3	3	9	7	3	3	5	2
ENSMUSG00000100146	1700020M21Rik	0	0	0	0	0	0	0	0	0	0	0	0	0	0	0	0	0	0
ENSMUSG00000050844	1700020N01Rik	3	1	2	2	4	0	0	3	1	3	2	0	8	3	1	1	1	3
ENSMUSG00000059690	1700020N15Rik	0	0	0	0	0	0	0	0	0	0	0	0	0	0	0	0	0	0
ENSMUSG00000100253	1700020N18Rik	0	0	0	0	0	0	0	0	0	0	0	0	0	0	0	0	0	0
ENSMUSG00000105426	1700021F02Rik	0	0	0	0	0	0	0	0	0	0	0	0	0	0	0	0	0	0
ENSMUSG00000019797	1700021F05Rik	649	634	716	678	1096	612	644	717	846	711	589	674	1037	780	603	582	690	631
ENSMUSG00000027518	1700021F07Rik	0	0	0	0	0	0	0	0	0	0	0	0	0	0	0	0	0	0
ENSMUSG00000112387	1700021G15Rik	0	0	0	0	0	0	0	0	0	0	0	0	0	0	0	0	0	0
ENSMUSG00000087343	1700021N21Rik	1	0	0	0	1	0	0	1	0	0	0	0	0	0	0	0	0	0
ENSMUSG00000038165	1700022A21Rik	0	0	0	0	0	0	0	0	0	0	0	0	0	0	0	0	0	0
ENSMUSG00000099751	1700022A22Rik	0	0	0	0	0	0	0	0	0	0	0	0	0	0	0	0	0	0
ENSMUSG00000099983	1700022E09Rik	0	0	0	0	0	0	0	0	0	0	0	0	0	0	0	0	0	0
ENSMUSG00000099360	1700022H16Rik	0	0	0	0	0	0	0	0	0	0	0	0	0	0	0	0	0	0
ENSMUSG00000028451	1700022I11Rik	0	4	0	0	3	0	1	1	1	0	0	0	1	2	0	1	0	1
ENSMUSG00000097523	1700022N22Rik	7	11	8	6	15	21	12	9	17	11	9	6	17	12	7	8	10	6
ENSMUSG00000087393	1700023C21Rik	0	0	0	0	0	0	0	0	0	0	0	0	0	0	0	0	0	0
ENSMUSG00000100000	1700023F02Rik	0	0	0	0	1	0	0	0	0	0	0	0	0	0	0	0	0	0
ENSMUSG00000052334	1700024B05Rik	0	0	0	0	0	0	0	0	0	0	0	0	0	0	0	0	0	0
ENSMUSG00000099994	1700024B18Rik	0	0	0	0	0	0	0	0	0	0	0	0	0	0	0	0	0	0
ENSMUSG00000097709	1700024F13Rik	181	192	199	179	295	138	164	180	150	99	103	151	293	163	180	146	139	136
ENSMUSG00000072473	1700024G13Rik	0	0	0	0	0	0	0	0	0	0	0	0	0	0	0	0	0	0
ENSMUSG00000113825	1700024I08Rik	0	0	0	0	0	0	0	0	0	0	0	0	0	0	0	0	0	0
ENSMUSG00000045022	1700024P04Rik	0	0	0	0	0	0	0	0	0	0	0	0	0	0	0	0	0	0
ENSMUSG00000101113	1700025B11Rik	0	0	0	0	0	0	0	0	0	0	0	0	0	0	0	0	0	0
ENSMUSG00000078935	1700025C18Rik	0	0	0	0	0	0	0	0	0	0	0	0	0	0	0	0	0	0
ENSMUSG00000100558	1700025F24Rik	0	0	0	0	0	0	0	0	0	0	0	0	0	0	0	0	0	0
ENSMUSG00000032666	1700025G04Rik	2806	2473	2879	2460	3556	2201	2727	3238	3139	3221	2929	3454	3751	2355	2103	2185	2196	2027
ENSMUSG00000108409	1700025J12Rik	0	0	0	0	0	0	0	0	0	0	0	0	0	0	0	0	0	0
ENSMUSG00000099747	1700025K24Rik	0	0	0	0	0	0	0	0	0	0	0	0	0	0	0	0	0	0
ENSMUSG00000100175	1700025M24Rik	0	0	0	0	0	0	0	0	0	0	0	0	0	0	0	0	0	0
ENSMUSG00000100121	1700025N23Rik	2	0	0	1	2	2	0	0	1	1	1	0	0	0	0	0	0	2
ENSMUSG00000086379	1700026D11Rik	1	0	0	0	0	0	0	0	0	1	0	0	0	0	0	0	0	0
ENSMUSG00000101854	1700026F02Rik	0	0	0	1	0	0	2	1	0	0	0	0	0	0	0	0	0	0
ENSMUSG00000073976	1700026J12Rik	0	0	0	0	0	0	0	0	0	0	0	0	0	0	0	0	0	0
ENSMUSG00000097716	1700026J14Rik	0	0	0	0	0	0	0	0	0	0	0	0	0	0	0	0	1	0
ENSMUSG00000101968	1700027A15Rik	0	0	0	0	0	0	0	0	0	0	0	0	0	0	0	0	0	0
ENSMUSG00000100911	1700027F09Rik	0	0	0	0	0	0	0	0	0	0	0	0	0	0	2	0	0	0
ENSMUSG00000100799	1700027H10Rik	0	0	0	0	0	0	0	0	0	0	0	0	0	0	0	0	0	0
ENSMUSG00000098304	1700027I24Rik	0	0	0	0	0	0	0	2	0	0	0	0	0	0	0	0	0	0
ENSMUSG00000111422	1700027J07Rik	1	1	0	0	0	2	0	0	0	0	0	0	0	0	0	0	0	0
ENSMUSG00000099417	1700028B04Rik	0	0	0	0	0	0	1	0	0	0	0	0	0	0	0	0	0	1
ENSMUSG00000101683	1700028D13Rik	0	0	0	0	0	0	0	0	0	0	0	0	0	0	0	0	0	0
ENSMUSG00000097321	1700028E10Rik	19	23	14	12	27	21	14	22	18	9	7	8	23	30	16	15	10	12
ENSMUSG00000056821	1700028I16Rik	3	4	5	1	15	3	2	1	0	2	2	3	12	7	3	2	1	0
ENSMUSG00000038782	1700028J19Rik	48	43	55	28	42	36	36	61	52	40	31	31	70	59	31	36	21	24
ENSMUSG00000089798	1700028K03Rik	2	3	7	1	3	2	0	3	1	0	1	1	6	2	1	0	0	0
ENSMUSG00000101334	1700028M03Rik	0	0	0	0	0	0	0	0	0	0	0	0	0	0	0	0	0	0
ENSMUSG00000033053	1700028P14Rik	0	0	0	0	0	0	0	0	0	0	0	0	0	1	0	0	0	0
ENSMUSG00000086823	1700028P15Rik	0	0	0	0	0	0	0	0	0	0	0	0	0	0	0	0	0	0
ENSMUSG00000100759	1700029B22Rik	0	0	0	0	0	0	0	0	0	0	0	0	0	0	0	0	0	0
ENSMUSG00000052075	1700029F12Rik	0	0	0	0	0	0	0	0	0	0	0	0	0	0	0	0	0	0
ENSMUSG00000031452	1700029H14Rik	1	0	0	0	0	0	0	0	0	0	0	1	0	0	0	0	0	0
ENSMUSG00000044916	1700029I15Rik	5	6	6	1	12	6	2	3	15	7	10	5	10	6	4	5	12	7
ENSMUSG00000099968	1700029J03Rik	0	0	0	0	0	1	0	0	0	0	0	0	0	0	0	0	0	0
ENSMUSG00000071103	1700029J07Rik	22	29	37	21	56	31	13	26	19	12	11	15	40	29	32	24	21	23
ENSMUSG00000086788	1700029M20Rik	0	0	0	0	0	0	0	0	0	0	0	0	0	0	0	0	0	0
ENSMUSG00000098144	1700029N11Rik	0	0	0	0	0	0	0	0	0	0	0	0	0	0	0	0	0	0
ENSMUSG00000061633	1700029P11Rik	0	0	0	0	0	0	0	0	0	0	0	0	0	0	0	0	0	0
ENSMUSG00000085333	1700030A11Rik	0	0	0	0	0	0	0	0	0	0	0	0	0	0	0	0	0	0
ENSMUSG00000099759	1700030C10Rik	0	0	1	0	0	1	0	0	0	0	0	0	0	0	0	0	0	0
ENSMUSG00000087148	1700030C14Rik	0	0	0	0	0	3	0	0	0	0	0	0	2	1	0	0	0	0
ENSMUSG00000099869	1700030F04Rik	0	0	0	0	0	0	0	0	0	0	0	0	0	0	0	0	0	0
ENSMUSG00000031847	1700030J22Rik	40	24	24	22	41	24	16	13	9	33	25	32	43	21	16	11	16	14
ENSMUSG00000052794	1700030K09Rik	367	386	390	384	581	373	323	370	431	277	277	275	710	516	365	342	350	324
ENSMUSG00000099508	1700030L20Rik	0	0	0	0	2	0	1	0	0	0	2	0	0	0	0	1	0	1
ENSMUSG00000097424	1700030M09Rik	0	0	0	1	0	0	0	0	1	0	0	0	0	0	0	0	0	0
ENSMUSG00000100969	1700030N03Rik	16	16	22	23	34	30	12	12	7	14	10	16	17	10	8	9	14	5
ENSMUSG00000100198	1700030O20Rik	0	2	1	0	3	2	0	2	1	0	1	5	0	2	0	2	0	0
ENSMUSG00000092239	1700031A10Rik	0	0	0	0	0	0	0	0	0	0	0	0	0	0	0	0	0	0
ENSMUSG00000032894	1700031F05Rik	0	0	0	0	0	0	0	0	0	0	0	0	0	0	0	0	0	0
ENSMUSG00000099863	1700031L13Rik	0	0	0	0	0	0	0	0	0	0	0	0	0	0	0	0	0	0
ENSMUSG00000099353	1700031M16Rik	0	0	0	0	0	0	0	0	0	0	0	0	0	0	0	0	0	0
ENSMUSG00000100315	1700031P21Rik	0	1	0	0	1	0	0	0	0	0	0	2	0	1	0	0	0	0
ENSMUSG00000097302	1700034B16Rik	0	0	0	0	0	0	0	0	0	0	0	0	0	0	0	0	0	0
ENSMUSG00000024532	1700034E13Rik	0	0	0	0	0	0	0	0	0	0	0	0	0	0	0	0	0	0
ENSMUSG00000097962	1700034G24Rik	0	0	0	0	0	0	0	0	0	0	0	0	0	0	0	0	0	0
ENSMUSG00000055833	1700034H15Rik	41	32	27	36	65	27	22	22	23	16	28	31	41	32	28	15	28	22
ENSMUSG00000074619	1700034I23Rik	1	0	1	1	0	0	1	0	1	2	0	0	2	0	0	1	0	1
ENSMUSG00000040163	1700034J05Rik	0	0	0	0	3	0	0	0	0	1	0	0	0	0	0	0	0	0
ENSMUSG00000100294	1700034K08Rik	0	0	0	0	0	0	0	0	0	0	0	0	0	0	0	0	0	0
ENSMUSG00000099995	1700036G14Rik	0	0	0	0	0	0	0	0	0	0	0	0	0	0	0	0	0	0
ENSMUSG00000005983	1700037C18Rik	79	70	70	64	115	86	46	41	79	39	54	56	93	79	60	41	62	75
ENSMUSG00000027327	1700037H04Rik	1662	1604	1836	1708	2621	1543	1745	1914	2185	2392	2137	2342	2755	1966	1429	1555	1633	1637
ENSMUSG00000092369	1700039E22Rik	0	0	0	0	0	0	0	0	0	0	0	0	0	0	0	0	0	0
ENSMUSG00000097933	1700039M10Rik	1	2	0	0	2	0	0	0	0	0	0	0	0	1	0	0	0	0
ENSMUSG00000097515	1700040D17Rik	23	24	22	9	23	19	9	15	17	9	5	12	49	30	28	14	16	17
ENSMUSG00000100535	1700040F15Rik	0	0	0	0	0	0	0	0	0	0	0	0	0	0	0	0	0	0
ENSMUSG00000100282	1700041C23Rik	0	0	0	0	0	0	0	0	0	0	0	0	0	0	0	0	0	0
ENSMUSG00000100857	1700041M19Rik	0	0	0	0	0	0	0	0	0	0	0	0	0	0	0	0	0	0
ENSMUSG00000078593	1700042G07Rik	0	0	2	0	0	0	0	0	2	4	3	0	0	1	0	0	0	0
ENSMUSG00000086391	1700042O10Rik	0	0	0	0	0	0	0	0	1	0	0	0	0	1	0	0	0	0
ENSMUSG00000099911	1700044C05Rik	0	0	0	0	0	0	0	0	0	0	0	0	0	0	0	0	0	0
ENSMUSG00000100297	1700044K03Rik	0	0	0	0	0	0	0	0	0	0	0	0	0	0	0	0	0	0
ENSMUSG00000078492	1700045H11Rik	0	0	0	0	0	0	0	0	0	0	0	0	0	0	0	0	0	0
ENSMUSG00000085561	1700046C09Rik	0	0	0	0	0	0	0	0	0	0	0	0	0	0	0	0	0	0
ENSMUSG00000085437	1700047A11Rik	0	0	0	0	1	0	0	0	0	0	0	0	0	0	0	0	0	0
ENSMUSG00000115294	1700047E10Rik	0	0	0	1	0	0	0	0	0	0	0	0	0	0	0	0	0	0
ENSMUSG00000099349	1700047G03Rik	0	0	0	1	0	0	0	0	1	0	4	7	0	0	0	1	0	1
ENSMUSG00000101762	1700047L14Rik	0	0	0	0	0	0	0	0	0	0	0	0	0	0	0	0	0	0
ENSMUSG00000100147	1700047M11Rik	0	0	0	0	0	0	0	0	0	0	0	0	0	0	1	0	1	0
ENSMUSG00000105274	1700048F04Rik	0	0	0	0	0	0	0	0	0	0	0	0	0	0	0	0	0	0
ENSMUSG00000085637	1700048M11Rik	2	1	1	2	0	0	0	1	3	1	1	0	2	0	0	5	2	1
ENSMUSG00000043773	1700048O20Rik	1	2	3	5	1	2	0	2	2	0	4	2	3	2	2	3	3	3
ENSMUSG00000085077	1700049E15Rik	0	0	0	0	0	0	0	0	0	0	0	0	0	0	0	0	0	0
ENSMUSG00000079271	1700049E17Rik1	0	0	0	0	0	0	0	0	0	0	0	0	0	0	0	0	0	0
ENSMUSG00000090440	1700049E17Rik1	0	0	0	0	0	0	0	0	0	0	0	0	0	0	0	0	0	0
ENSMUSG00000101553	1700049E22Rik	0	0	0	0	0	0	0	0	1	0	1	0	0	0	0	0	0	0
ENSMUSG00000086951	1700051A21Rik	0	0	0	0	0	0	0	0	0	0	0	0	0	0	0	0	0	0
ENSMUSG00000101912	1700052I22Rik	0	0	0	0	0	0	0	0	0	0	0	0	0	0	0	0	0	0
ENSMUSG00000099988	1700054A03Rik	0	0	0	0	0	0	0	0	0	0	0	0	0	0	0	0	0	0
ENSMUSG00000100219	1700054K19Rik	0	0	0	0	0	0	0	0	0	0	0	0	0	0	0	0	0	0
ENSMUSG00000085889	1700054M17Rik	1	0	3	1	2	3	2	2	0	0	0	2	2	0	6	2	1	1
ENSMUSG00000093616	1700055C04Rik	0	0	0	0	0	0	0	0	0	0	0	0	0	0	0	0	0	0
ENSMUSG00000070997	1700055D18Rik	17	8	7	13	20	14	2	4	4	4	1	6	14	13	10	5	14	23
ENSMUSG00000044854	1700056E22Rik	4	2	0	5	19	2	2	5	3	9	7	4	5	9	1	2	3	5
ENSMUSG00000074139	1700057G04Rik	0	0	0	0	1	0	0	0	0	0	0	0	0	0	0	0	0	0
ENSMUSG00000086007	1700057H21Rik	0	0	0	0	0	0	0	0	0	0	0	0	0	0	0	0	0	0
ENSMUSG00000086887	1700060C16Rik	0	0	0	0	0	0	0	0	0	0	0	0	0	0	0	0	0	0
ENSMUSG00000078957	1700060C20Rik	0	0	0	1	0	0	0	0	0	0	0	0	0	0	0	0	0	0
ENSMUSG00000085580	1700061F12Rik	0	0	0	0	0	0	0	0	0	0	0	0	0	0	0	0	0	0
ENSMUSG00000028009	1700061I17Rik	0	0	0	0	0	0	0	0	1	1	0	0	0	0	0	0	0	0
ENSMUSG00000086366	1700061J23Rik	0	0	0	0	0	0	0	0	0	0	0	0	0	0	0	0	0	0
ENSMUSG00000110464	1700061N14Rik	0	0	0	0	0	0	0	0	0	0	0	0	0	0	0	0	0	0
ENSMUSG00000114390	1700062C10Rik	0	0	0	0	0	0	0	0	0	0	0	0	0	0	0	0	0	0
ENSMUSG00000100062	1700063A18Rik	0	0	0	0	0	0	0	0	0	0	0	0	0	0	0	0	0	0
ENSMUSG00000100837	1700063D05Rik	50	53	67	55	67	47	23	47	31	34	25	33	61	30	49	60	46	47
ENSMUSG00000040657	1700063H04Rik	0	0	0	1	1	1	0	0	0	3	0	1	3	0	0	0	0	1
ENSMUSG00000099266	1700063H06Rik	0	0	0	0	0	0	0	0	0	0	0	0	0	0	0	0	0	0
ENSMUSG00000101978	1700063O14Rik	0	0	0	0	0	0	0	0	0	0	0	0	0	0	0	0	0	0
ENSMUSG00000100681	1700064J06Rik	0	0	0	0	0	0	0	0	0	0	0	0	0	0	0	0	0	0
ENSMUSG00000100211	1700064M15Rik	1	0	0	2	1	0	0	0	0	1	0	0	1	0	0	0	1	2
ENSMUSG00000096655	1700065D16Rik	6	6	4	7	9	4	6	8	3	3	12	0	0	4	3	3	0	4
ENSMUSG00000099435	1700065I16Rik	0	0	0	0	0	0	0	0	0	0	0	0	0	0	0	0	0	0
ENSMUSG00000107341	1700065J11Rik	0	0	0	0	0	0	0	0	0	0	0	0	0	0	0	0	0	0
ENSMUSG00000107408	1700065L07Rik	0	0	0	0	0	0	0	0	0	0	0	0	0	0	0	0	0	0
ENSMUSG00000100134	1700065O20Rik	0	0	0	0	0	0	0	0	0	0	0	0	0	0	0	0	0	0
ENSMUSG00000101634	1700066B17Rik	0	0	0	0	0	0	0	0	0	1	0	4	1	0	0	0	0	0
ENSMUSG00000073598	1700066B19Rik	5	5	7	13	12	2	9	3	6	5	6	8	11	13	8	10	13	4
ENSMUSG00000097717	1700066J03Rik	0	0	0	0	0	0	0	0	0	0	0	1	0	0	0	0	0	0
ENSMUSG00000038323	1700066M21Rik	568	545	578	496	907	486	459	476	547	324	371	466	558	327	261	336	353	319
ENSMUSG00000099605	1700066N21Rik	0	0	0	0	0	0	0	0	0	0	0	0	0	0	0	0	0	0
ENSMUSG00000085800	1700066O22Rik	0	0	0	0	0	0	0	0	0	0	0	0	0	0	0	0	0	0
ENSMUSG00000099378	1700067G17Rik	0	0	0	0	0	0	0	0	0	0	0	0	0	0	0	0	0	0
ENSMUSG00000046408	1700067K01Rik	11	8	6	7	6	8	6	6	2	5	2	1	9	5	3	8	14	12
ENSMUSG00000042184	1700069L16Rik	0	0	0	0	0	0	0	0	0	0	0	0	0	0	0	0	0	0
ENSMUSG00000107637	1700069P05Rik	0	0	0	0	0	0	0	0	0	0	0	0	0	0	0	0	0	0
ENSMUSG00000086376	1700071G01Rik	0	0	0	0	0	0	0	0	0	0	0	0	0	0	0	0	0	0
ENSMUSG00000080980	1700071K01Rik	0	0	0	0	2	1	0	0	0	0	1	0	0	0	0	0	0	0
ENSMUSG00000090307	1700071M16Rik	0	0	0	0	0	0	0	0	0	0	0	0	0	0	0	0	0	0
ENSMUSG00000100487	1700072B07Rik	0	0	0	0	0	0	0	0	0	0	0	0	0	0	0	0	0	0
ENSMUSG00000099872	1700074H08Rik	0	0	0	0	0	0	0	0	0	0	0	0	0	0	0	0	0	0
ENSMUSG00000029883	1700074P13Rik	0	0	0	0	0	0	0	0	0	0	0	0	0	0	0	0	0	0
ENSMUSG00000084859	1700080N15Rik	0	0	0	0	0	0	0	0	0	0	0	0	0	0	0	0	0	0
ENSMUSG00000031118	1700080O16Rik	0	0	0	0	0	0	0	0	0	0	0	0	0	0	0	0	0	0
ENSMUSG00000100573	1700081H04Rik	0	0	0	0	0	0	0	0	0	0	0	0	0	0	0	0	0	0
ENSMUSG00000100668	1700083H02Rik	0	0	0	0	0	0	0	0	0	0	0	0	0	0	0	0	0	0
ENSMUSG00000114333	1700084D21Rik	0	0	0	0	0	0	0	0	0	0	0	0	0	0	0	0	0	0
ENSMUSG00000099639	1700084F23Rik	0	0	0	0	0	0	0	0	0	0	0	0	0	0	0	0	0	0
ENSMUSG00000058101	1700084J12Rik	1	0	2	0	1	3	0	1	1	3	0	2	0	1	1	3	0	1
ENSMUSG00000057805	1700084M14Rik	0	0	0	0	0	0	0	0	0	0	0	0	0	0	0	0	0	0
ENSMUSG00000100890	1700085C21Rik	0	0	0	0	0	0	0	0	0	0	0	0	0	0	0	0	0	0
ENSMUSG00000071265	1700086L19Rik	2	0	0	0	0	0	2	0	2	0	0	0	3	2	2	0	0	2
ENSMUSG00000097080	1700086O06Rik	123	125	166	101	171	108	196	246	286	178	183	187	262	208	165	127	126	90
ENSMUSG00000115723	1700087M22Rik	0	0	0	0	0	0	0	0	0	0	0	0	0	0	0	0	0	0
ENSMUSG00000033029	1700088E04Rik	45	22	42	20	40	22	60	38	68	70	65	86	57	52	27	33	36	35
ENSMUSG00000090462	1700091H14Rik	0	0	0	0	0	0	0	0	0	0	0	0	0	0	0	0	0	0
ENSMUSG00000086781	1700092C02Rik	0	0	0	0	0	0	0	0	0	0	0	0	0	0	0	0	0	0
ENSMUSG00000092499	1700092C10Rik	0	0	0	0	0	0	0	0	0	0	0	0	0	0	0	0	0	0
ENSMUSG00000084811	1700092E19Rik	0	0	0	0	0	0	0	0	0	0	0	0	0	0	0	0	0	0
ENSMUSG00000078600	1700092K14Rik	0	0	0	0	0	0	0	0	0	0	0	0	0	0	0	0	0	0
ENSMUSG00000090840	1700092M07Rik	3	5	5	6	7	5	2	4	1	2	1	7	8	4	2	3	6	2
ENSMUSG00000020286	1700093K21Rik	6	3	3	4	3	4	4	2	5	0	3	4	7	3	2	1	2	3
ENSMUSG00000027942	1700094D03Rik	1724	1593	1823	1666	2626	1407	1311	1488	1639	1339	1309	1540	2625	1773	1391	1456	1577	1623
ENSMUSG00000118506	1700094D03Rik	19	22	40	33	66	32	20	16	18	11	14	19	63	33	25	29	23	36
ENSMUSG00000101695	1700094J05Rik	0	0	0	0	0	0	0	0	0	2	0	0	1	0	0	0	0	0
ENSMUSG00000107895	1700094M24Rik	0	0	0	0	0	0	0	0	0	0	0	0	0	0	0	0	0	0
ENSMUSG00000086046	1700095A21Rik	0	1	0	0	2	0	1	0	0	0	0	0	1	1	2	3	1	0
ENSMUSG00000098230	1700095B10Rik	0	0	0	0	0	0	0	0	0	0	0	0	0	0	0	0	0	0
ENSMUSG00000085407	1700095J03Rik	0	0	0	0	0	0	0	0	0	0	0	0	0	0	0	0	0	0
ENSMUSG00000084804	1700095J12Rik	0	0	1	0	0	0	0	0	0	0	0	0	1	0	0	0	0	0
ENSMUSG00000099630	1700096J18Rik	0	0	0	0	0	0	0	0	0	0	0	0	0	0	0	0	0	0
ENSMUSG00000101856	1700096K18Rik	8	12	11	8	19	8	5	2	6	21	9	15	17	15	10	7	8	9
ENSMUSG00000099474	1700097N02Rik	0	0	0	0	0	0	0	0	0	0	0	0	0	0	0	0	0	0
ENSMUSG00000091906	1700099I09Rik	3	4	2	6	10	2	1	2	1	5	3	3	1	2	2	2	0	0
ENSMUSG00000115372	1700100I10Rik	0	0	0	0	0	0	0	0	0	0	0	0	0	0	0	0	0	0
ENSMUSG00000101051	1700100L14Rik	0	0	0	0	0	0	0	0	0	0	0	0	0	0	0	0	0	0
ENSMUSG00000097675	1700101I11Rik	2	1	2	4	2	5	0	1	8	4	5	4	11	3	4	3	1	5
ENSMUSG00000102096	1700101O22Rik	0	0	0	0	0	0	0	0	0	0	0	0	0	0	0	0	0	0
ENSMUSG00000116852	1700102H20Rik	7	6	3	3	13	3	3	5	8	7	2	5	16	6	8	7	6	5
ENSMUSG00000032611	1700102P08Rik	4	12	4	6	9	6	5	5	10	9	2	4	19	2	6	9	7	6
ENSMUSG00000112821	1700104L18Rik	0	0	0	0	0	0	0	0	0	0	0	0	0	0	0	0	0	0
ENSMUSG00000101009	1700108F19Rik	0	0	1	1	0	0	0	0	0	0	0	0	1	0	0	0	0	0
ENSMUSG00000100585	1700108J01Rik	0	0	0	0	0	0	0	0	0	0	0	0	0	0	0	0	0	0
ENSMUSG00000101505	1700109G14Rik	1	0	0	0	0	0	0	0	0	1	0	0	1	1	0	0	1	0
ENSMUSG00000085044	1700109G15Rik	0	0	0	0	0	0	0	0	0	0	0	0	0	0	0	0	0	0
ENSMUSG00000008307	1700109H08Rik	61	46	44	31	68	37	35	53	36	35	41	44	68	26	29	39	38	44
ENSMUSG00000101261	1700109I08Rik	0	0	0	0	0	0	0	0	0	0	0	0	0	0	0	0	0	0
ENSMUSG00000097267	1700109K24Rik	1	1	9	2	9	4	0	0	2	0	1	4	6	2	2	7	3	2
ENSMUSG00000099384	1700110C19Rik	1	0	0	0	0	0	0	0	2	0	1	0	0	0	0	0	0	0
ENSMUSG00000079407	1700110I01Rik	0	0	0	6	0	0	2	0	0	0	0	0	0	0	1	0	0	0
ENSMUSG00000108490	1700110I07Rik	0	0	0	0	0	0	0	0	0	0	0	0	0	0	0	0	0	0
ENSMUSG00000100511	1700111N16Rik	0	0	0	0	0	0	0	0	0	0	0	0	0	0	0	0	0	0
ENSMUSG00000101574	1700112H15Rik	0	1	0	3	0	1	2	0	0	1	0	0	0	2	0	0	0	4
ENSMUSG00000086632	1700112J05Rik	0	0	0	1	1	1	1	0	1	1	0	0	0	0	0	0	0	0
ENSMUSG00000097527	1700112J16Rik	0	2	1	1	5	5	2	3	2	1	0	0	3	1	1	1	0	3
ENSMUSG00000096935	1700113A16Rik	90	74	95	81	143	82	70	65	74	38	37	64	129	102	81	60	48	72
ENSMUSG00000112028	1700113B09Rik	0	0	0	0	0	0	0	0	0	0	0	0	0	0	0	0	0	0
ENSMUSG00000047129	1700113H08Rik	0	0	0	0	0	0	0	0	0	0	0	0	0	0	0	0	0	0
ENSMUSG00000092276	1700116B05Rik	0	0	0	0	0	0	1	0	0	0	0	2	1	0	0	0	0	0
ENSMUSG00000100593	1700119H24Rik	0	0	0	0	0	0	0	0	0	0	0	0	0	0	0	0	0	0
ENSMUSG00000100599	1700120C14Rik	19	20	32	25	53	20	28	32	44	41	26	61	47	38	31	41	36	59
ENSMUSG00000100717	1700120G07Rik	0	0	0	0	0	0	0	0	0	0	0	0	0	0	0	0	0	0
ENSMUSG00000099579	1700120K04Rik	0	0	0	0	0	0	0	0	0	0	0	0	0	0	0	0	0	0
ENSMUSG00000100364	1700121L16Rik	0	0	0	0	0	0	0	0	0	0	0	0	0	0	0	0	0	0
ENSMUSG00000092066	1700121N20Rik	0	0	0	0	0	0	0	0	0	0	0	0	0	0	0	0	0	0
ENSMUSG00000117800	1700122C19Rik	0	0	0	0	0	0	0	0	0	0	0	0	0	0	0	0	0	0
ENSMUSG00000099735	1700122H20Rik	0	0	0	0	0	1	0	0	0	0	0	1	0	0	0	0	0	0
ENSMUSG00000094928	1700122O11Rik	0	0	0	0	0	0	0	0	0	0	0	0	0	0	0	0	0	0
ENSMUSG00000108676	1700123J17Rik	0	0	0	0	1	0	0	0	0	0	0	0	1	0	0	0	0	0
ENSMUSG00000029526	1700123K08Rik	0	0	1	0	0	0	0	0	0	0	0	0	0	0	0	0	0	0
ENSMUSG00000072878	1700123L14Rik	0	0	0	0	0	0	0	0	0	0	0	0	0	0	0	0	0	0
ENSMUSG00000086080	1700123O12Rik	0	0	0	0	0	0	0	0	0	0	0	0	0	0	0	0	0	0
ENSMUSG00000040822	1700123O20Rik	738	664	790	750	1181	628	641	683	746	654	679	831	1091	739	629	759	835	770
ENSMUSG00000101481	1700123O21Rik	0	0	0	0	0	0	0	0	0	0	0	0	0	0	0	0	0	0
ENSMUSG00000099354	1700124L16Rik	8	12	5	4	7	11	3	5	14	3	2	1	10	20	9	4	4	5
ENSMUSG00000085263	1700125G02Rik	0	0	0	0	0	0	0	0	0	0	0	0	0	0	0	0	0	0
ENSMUSG00000097584	1700125G22Rik	1	0	2	0	0	0	0	0	0	0	0	0	0	0	0	0	0	0
ENSMUSG00000085197	1700125H03Rik	0	0	0	0	0	0	0	0	0	0	0	0	0	0	0	0	0	0
ENSMUSG00000018479	1700125H20Rik	0	0	0	0	1	2	0	0	0	0	0	0	1	0	0	3	0	0
ENSMUSG00000107014	1700126H18Rik	0	0	0	0	0	0	0	0	0	0	0	0	0	0	0	0	0	0
ENSMUSG00000099794	1700128A07Rik	0	0	0	0	0	0	0	0	0	0	0	0	0	0	0	0	0	0
ENSMUSG00000031998	1700128F08Rik	0	0	6	3	2	0	0	4	1	1	0	2	3	3	0	0	2	0
ENSMUSG00000021977	1700129C05Rik	0	0	0	0	0	0	0	0	0	0	0	0	0	0	0	0	0	0
ENSMUSG00000100182	1810006J02Rik	1	0	2	1	0	0	0	0	0	2	0	0	1	0	1	0	0	0
ENSMUSG00000100844	1810007C17Rik	0	0	0	0	0	0	0	0	0	0	0	0	0	0	0	0	0	0
ENSMUSG00000100001	1810007D17Rik	0	0	0	0	0	0	0	0	0	0	0	0	0	0	0	0	0	0
ENSMUSG00000071653	1810009A15Rik	1533	1306	1593	1390	2124	1280	1497	1540	1882	1179	1060	1327	2562	1857	1351	1521	1734	1771
ENSMUSG00000094808	1810009J06Rik	0	0	0	0	0	0	0	0	0	0	0	0	0	0	0	0	0	0
ENSMUSG00000078607	1810010H24Rik	6	10	15	17	20	19	11	7	11	14	16	9	26	23	13	2	8	6
ENSMUSG00000099825	1810012K16Rik	0	0	1	0	1	0	0	0	0	0	1	0	0	1	0	2	0	0
ENSMUSG00000028177	1810013D15Rik	27	18	21	56	90	43	11	17	18	32	36	43	46	33	19	33	24	34
ENSMUSG00000022507	1810013L24Rik	1416	1392	1489	1477	2219	1329	1386	1627	1640	1359	1246	1556	2579	1642	1618	1545	1640	1591
ENSMUSG00000097412	1810014B01Rik	153	140	149	108	182	103	128	145	177	98	101	106	241	168	154	110	102	100
ENSMUSG00000101088	1810018F18Rik	0	0	0	0	0	0	0	0	0	0	0	0	0	0	0	0	0	0
ENSMUSG00000097115	1810019N24Rik	2	8	2	3	5	4	2	3	1	3	4	7	9	4	3	4	3	4
ENSMUSG00000087331	1810021B22Rik	9	5	6	10	8	5	3	7	12	13	12	7	13	18	9	11	12	7
ENSMUSG00000044145	1810024B03Rik	98	81	101	57	104	49	69	74	92	56	56	51	160	89	75	53	62	63
ENSMUSG00000101970	1810026B05Rik	484	413	456	379	545	343	325	337	338	262	243	301	774	515	425	337	378	380
ENSMUSG00000044148	1810030O07Rik	1360	1181	1369	1402	2088	1246	998	1054	1158	876	830	958	1980	1248	1165	1173	1205	1024
ENSMUSG00000097101	1810034E14Rik	42	36	55	17	33	17	53	67	64	37	38	47	111	78	63	43	30	39
ENSMUSG00000118223	1810035K13Rik	0	0	0	0	0	0	0	0	0	0	0	0	0	0	0	0	0	0
ENSMUSG00000054091	1810037I17Rik	1920	1803	2047	1697	2549	1484	1991	2152	2363	1971	1857	2170	3752	2646	2024	2510	2631	2590
ENSMUSG00000102112	1810041H14Rik	4	3	3	4	4	5	3	8	2	5	4	4	9	6	4	4	2	1
ENSMUSG00000100680	1810044D09Rik	33	15	30	27	32	16	26	24	32	34	23	32	52	39	31	16	29	34
ENSMUSG00000036027	1810046K07Rik	0	0	0	1	0	1	0	0	0	1	0	0	1	0	0	0	0	0
ENSMUSG00000108587	1810049I09Rik	0	0	0	0	0	0	0	0	0	0	0	0	0	0	0	0	0	0
ENSMUSG00000100277	1810053B23Rik	0	0	0	0	0	0	0	0	0	0	0	0	0	0	0	0	0	0
ENSMUSG00000035372	1810055G02Rik	936	899	1005	949	1540	937	922	1090	1133	1123	922	1308	1590	1088	853	1089	1135	1128
ENSMUSG00000073155	1810058I24Rik	1080	919	1188	682	1059	681	1303	1423	1660	1004	874	1142	2524	1948	1433	1070	1134	1195
ENSMUSG00000027713	1810062G17Rik	3	8	11	7	8	6	4	8	9	21	11	29	8	10	4	10	7	6
ENSMUSG00000084925	1810062O18Rik	3	4	6	5	6	9	1	13	11	2	5	2	4	7	7	7	3	5
ENSMUSG00000085551	1810063I02Rik	0	0	0	0	0	0	0	0	0	0	0	0	0	0	0	0	0	0
ENSMUSG00000090925	1810064F22Rik	10	9	8	14	12	9	5	7	7	8	7	12	9	6	9	6	7	9
ENSMUSG00000013653	1810065E05Rik	0	0	0	0	0	0	0	0	0	0	0	0	0	0	0	0	0	0
ENSMUSG00000117442	1810073O08Rik	0	0	0	0	0	1	0	0	0	0	0	0	0	0	0	0	0	0
ENSMUSG00000087165	2010001A14Rik	20	17	12	14	20	10	26	44	40	30	29	31	46	34	26	15	15	20
ENSMUSG00000042041	2010003K11Rik	1	1	0	1	2	2	1	3	1	1	2	1	5	2	2	2	0	2
ENSMUSG00000100860	2010009K17Rik	0	0	0	0	0	1	0	0	0	1	0	0	0	1	0	0	0	0
ENSMUSG00000102047	2010010A06Rik	0	1	0	0	0	0	1	0	0	0	0	0	0	0	0	0	0	0
ENSMUSG00000091575	2010016I18Rik	32	35	66	96	166	99	20	8	21	29	26	36	53	26	18	40	55	40
ENSMUSG00000100738	2010106C02Rik	0	0	0	0	0	0	0	0	0	0	0	0	1	0	0	0	0	0
ENSMUSG00000025528	2010106E10Rik	0	0	0	0	0	0	0	0	0	0	0	0	1	0	0	0	0	0
ENSMUSG00000029384	2010109A12Rik	1	0	3	0	1	0	1	1	2	1	2	1	1	0	3	0	1	0
ENSMUSG00000026090	2010300C02Rik	710	643	754	355	545	328	250	277	281	157	107	127	486	332	267	182	151	158
ENSMUSG00000100714	2010308F09Rik	0	0	0	0	0	0	0	0	0	0	0	0	0	0	0	1	0	0
ENSMUSG00000101268	2010310C07Rik	0	0	0	1	0	0	0	0	2	0	0	0	0	0	0	0	0	1
ENSMUSG00000074829	2010315B03Rik	136	156	160	161	291	162	131	159	152	218	145	235	216	111	136	112	118	118
ENSMUSG00000030587	2200002D01Rik	1	2	5	2	1	1	1	3	0	0	0	2	2	0	1	2	2	1
ENSMUSG00000013083	2200002J24Rik	3	11	6	0	1	2	3	2	0	3	2	2	3	9	5	2	0	3
ENSMUSG00000029882	2210010C04Rik	0	0	1	0	0	1	0	0	0	0	0	0	2	0	0	1	1	1
ENSMUSG00000021550	2210016F16Rik	2305	2260	2489	2278	3585	2020	1939	2112	2308	1993	1864	2244	3859	2698	2142	2252	2359	2375
ENSMUSG00000029559	2210016L21Rik	1064	898	1044	1128	1620	919	964	1102	1215	1102	989	1186	1701	1132	879	848	964	903
ENSMUSG00000113800	2210039B01Rik	0	1	3	5	4	2	2	1	0	1	0	1	0	1	0	0	1	1
ENSMUSG00000114772	2210404E10Rik	0	0	0	0	0	0	0	0	0	0	0	0	0	0	0	0	1	0
ENSMUSG00000039563	2210406O10Rik	35	32	26	16	29	14	20	27	34	37	58	53	83	49	29	12	17	20
ENSMUSG00000037145	2210407C18Rik	0	0	0	0	0	0	0	0	0	0	0	0	0	0	0	0	0	0
ENSMUSG00000087380	2210408F21Rik	74	76	90	46	83	54	103	91	104	65	66	80	267	134	106	65	71	53
ENSMUSG00000071252	2210408I21Rik	118	123	130	104	183	106	107	115	107	90	74	117	246	106	135	151	150	140
ENSMUSG00000118322	2210409D07Rik	0	0	0	0	0	0	0	0	0	0	0	0	0	0	0	0	0	0
ENSMUSG00000081766	2210409E12Rik	0	0	0	0	0	0	0	0	0	0	0	0	0	0	0	0	1	0
ENSMUSG00000085394	2210414B05Rik	0	0	0	0	0	0	0	0	0	0	0	0	0	1	0	0	0	0
ENSMUSG00000018378	2210416O15Rik	665	592	699	565	815	559	632	633	699	773	613	788	1027	754	595	384	416	380
ENSMUSG00000086494	2210417A02Rik	23	28	31	25	34	13	22	31	23	19	23	20	56	43	40	32	36	27
ENSMUSG00000078894	2210418O10Rik	661	589	677	527	831	309	689	717	729	397	441	558	1392	713	703	627	653	597
ENSMUSG00000101773	2210420H20Rik	0	0	0	0	0	0	0	0	0	0	0	0	0	0	0	0	0	0
ENSMUSG00000039269	2300002M23Rik	0	0	0	0	0	0	0	0	0	0	0	0	0	0	0	0	0	0
ENSMUSG00000078257	2300003K06Rik	0	0	0	0	0	0	0	0	0	0	0	0	0	0	0	0	0	0
ENSMUSG00000032403	2300009A05Rik	122	112	121	118	163	104	135	139	169	155	143	165	247	178	139	102	140	143
ENSMUSG00000097354	2310001H17Rik	3	1	1	14	14	3	3	2	6	7	6	13	2	3	0	4	3	3
ENSMUSG00000053353	2310001K24Rik	7	2	10	6	14	3	0	3	1	6	4	7	8	0	1	3	1	9
ENSMUSG00000112701	2310002D06Rik	0	0	0	0	0	0	0	0	0	0	0	0	0	0	0	0	0	0
ENSMUSG00000097178	2310002F09Rik	5	2	4	1	2	2	0	0	0	1	3	0	0	0	0	0	0	0
ENSMUSG00000028396	2310002L09Rik	2	0	0	0	0	1	1	1	2	0	0	0	1	0	0	0	0	0
ENSMUSG00000110916	2310003N18Rik	0	0	0	0	0	0	0	0	0	0	0	0	0	0	0	0	0	0
ENSMUSG00000087254	2310005A03Rik	0	0	0	0	0	0	0	0	0	0	0	0	1	0	0	0	0	0
ENSMUSG00000099446	2310005E17Rik	0	0	0	0	0	0	0	0	0	0	0	0	0	0	0	0	0	0
ENSMUSG00000100335	2310008N11Rik	0	0	0	0	0	0	0	0	0	0	0	0	1	0	0	0	0	0
ENSMUSG00000098332	2310009A05Rik	213	211	238	212	302	200	197	235	211	199	165	232	353	241	165	139	206	164
ENSMUSG00000079283	2310009B15Rik	516	433	536	523	813	446	374	451	519	417	340	498	604	455	358	246	340	336
ENSMUSG00000097162	2310010J17Rik	3	11	14	9	13	12	7	8	8	3	8	4	12	8	10	6	10	16
ENSMUSG00000020133	2310011J03Rik	1392	1242	1370	1499	2244	1249	1398	1614	1776	1477	1395	1592	2281	1708	1304	1661	1737	1587
ENSMUSG00000099411	2310015D24Rik	0	0	0	0	0	0	0	0	3	0	0	0	0	0	1	0	0	0
ENSMUSG00000102098	2310016D03Rik	0	0	0	0	0	0	0	0	0	0	0	0	0	0	0	0	0	0
ENSMUSG00000100410	2310020H05Rik	0	0	1	0	0	0	0	0	0	1	0	1	2	2	0	0	0	0
ENSMUSG00000049643	2310022A10Rik	1495	1266	1504	1396	2046	1216	1308	1539	1555	1452	1397	1578	2788	2020	1554	1651	1725	1645
ENSMUSG00000031983	2310022B05Rik	927	898	965	933	1240	812	516	565	620	540	431	618	1039	690	604	617	650	638
ENSMUSG00000099447	2310030A07Rik	0	0	0	0	0	0	0	1	0	0	0	0	0	0	0	0	0	0
ENSMUSG00000032062	2310030G06Rik	0	1	1	0	1	1	0	1	0	1	2	1	0	2	2	5	3	1
ENSMUSG00000020441	2310033P09Rik	653	583	698	563	801	503	686	696	818	469	389	482	1173	881	634	587	691	696
ENSMUSG00000068078	2310034C09Rik	0	0	0	0	0	0	0	0	0	0	0	0	0	0	0	0	0	0
ENSMUSG00000100157	2310034O05Rik	2	0	1	0	0	0	4	11	8	17	8	8	1	1	0	0	1	0
ENSMUSG00000062619	2310039H08Rik	201	164	230	188	281	184	112	171	176	181	157	170	310	247	156	143	150	158
ENSMUSG00000100550	2310039L15Rik	4	3	7	3	8	6	1	0	1	2	1	0	7	7	2	5	4	3
ENSMUSG00000101655	2310040G24Rik	52	44	50	135	145	70	49	50	64	28	39	43	104	58	50	49	46	31
ENSMUSG00000101746	2310043L19Rik	4	3	0	0	3	3	2	0	2	2	1	0	2	1	1	7	0	1
ENSMUSG00000097768	2310043M15Rik	7	6	6	2	7	9	5	13	8	5	7	7	6	4	0	5	3	5
ENSMUSG00000102106	2310043O21Rik	0	0	0	0	0	0	0	0	0	0	0	0	0	0	0	0	0	0
ENSMUSG00000090314	2310050C09Rik	0	0	0	0	0	0	0	1	0	0	0	0	0	0	0	0	0	0
ENSMUSG00000015519	2310057J18Rik	0	0	0	0	0	0	0	0	0	0	0	0	0	0	0	0	0	0
ENSMUSG00000040177	2310057M21Rik	758	627	787	723	1132	652	576	654	689	554	502	637	1197	754	677	759	822	724
ENSMUSG00000048830	2310057N15Rik	0	0	0	0	0	0	0	0	0	0	0	0	0	0	0	0	0	0
ENSMUSG00000050705	2310061I04Rik	702	726	749	882	1351	777	708	811	890	768	650	745	1274	1015	733	827	778	779
ENSMUSG00000050704	2310061N02Rik	0	0	0	0	0	0	0	0	0	0	0	0	0	0	0	0	0	0
ENSMUSG00000087410	2310065F04Rik	0	0	0	0	0	0	0	0	0	0	0	0	0	0	0	0	0	0
ENSMUSG00000100084	2310068J16Rik	8	24	11	6	15	6	6	9	4	2	6	11	23	6	7	12	9	16
ENSMUSG00000100291	2310069B03Rik	1	1	2	0	1	0	1	0	1	6	5	10	5	2	0	0	0	1
ENSMUSG00000060530	2310069G16Rik	0	0	0	0	0	0	0	0	0	0	0	0	0	0	0	0	0	0
ENSMUSG00000045331	2310079G19Rik	0	0	0	0	0	0	0	0	0	0	0	0	0	0	0	0	0	0
ENSMUSG00000045411	2410002F23Rik	3859	3536	4057	3032	4992	2954	3023	3365	3825	2022	1807	2206	6610	4247	3816	3671	3667	3489
ENSMUSG00000085860	2410003L11Rik	0	0	0	0	0	0	0	0	0	0	0	0	0	0	0	0	0	0
ENSMUSG00000036873	2410004B18Rik	1240	1209	1373	1210	1922	1066	1042	1073	1292	834	837	959	2046	1329	1105	1159	1263	1323
ENSMUSG00000085338	2410004I01Rik	0	0	0	0	0	0	0	0	0	0	0	0	0	0	0	0	0	0
ENSMUSG00000071398	2410004P03Rik	0	4	2	4	1	5	4	2	3	5	3	5	5	6	3	4	1	2
ENSMUSG00000086841	2410006H16Rik	560	437	561	697	1100	635	749	767	881	624	534	598	1332	953	713	547	648	652
ENSMUSG00000099528	2410012E07Rik	0	0	0	0	0	0	0	0	0	0	0	0	0	0	0	0	0	0
ENSMUSG00000038311	2410017I17Rik	3	1	1	3	6	2	2	2	0	0	1	0	1	2	0	3	4	3
ENSMUSG00000073164	2410018L13Rik	5	1	3	3	6	5	5	5	5	1	1	5	10	5	2	4	1	2
ENSMUSG00000100572	2410021H03Rik	0	0	0	0	0	0	0	0	0	0	0	0	0	1	0	0	0	0
ENSMUSG00000100017	2410022M11Rik	25	26	34	20	43	32	17	28	18	19	24	21	82	65	55	21	28	21
ENSMUSG00000051297	2410124H12Rik	0	0	0	0	0	0	0	0	0	0	0	0	0	0	0	1	0	0
ENSMUSG00000032840	2410131K14Rik	656	655	742	791	1175	730	650	715	788	567	555	643	1170	776	685	650	693	670
ENSMUSG00000064308	2410137M14Rik	0	0	0	0	0	0	0	0	0	0	0	0	0	0	0	0	0	0
ENSMUSG00000074832	2410141K09Rik	0	0	0	0	0	0	0	0	0	0	0	0	0	0	0	0	0	0
ENSMUSG00000096917	2500002B13Rik	233	236	256	177	210	166	213	219	211	365	303	348	555	319	258	357	428	399
ENSMUSG00000073236	2500004C02Rik	68	55	52	67	84	60	43	53	58	38	51	37	111	98	69	65	54	69
ENSMUSG00000071632	2510002D24Rik	1	3	2	7	4	12	0	2	3	1	2	3	7	3	0	3	1	1
ENSMUSG00000043391	2510009E07Rik	2	1	4	0	4	0	1	1	0	4	3	5	14	12	7	11	6	7
ENSMUSG00000044496	2510039O18Rik	2415	2204	2524	2349	3450	2141	2059	2343	2485	1804	1692	2037	4048	2785	2398	2432	2528	2366
ENSMUSG00000052419	2610001J05Rik	1119	1044	1195	1093	1622	928	1355	1433	1742	1098	1047	1298	2100	1399	1263	1241	1306	1265
ENSMUSG00000031242	2610002M06Rik	1063	905	1007	1163	1749	1044	744	817	895	681	670	780	1327	776	782	1166	1185	1048
ENSMUSG00000071793	2610005L07Rik	816	863	875	882	1526	846	692	762	651	492	525	630	1079	493	702	741	635	609
ENSMUSG00000060301	2610008E11Rik	184	167	217	124	184	101	97	107	108	77	83	94	279	146	154	89	107	95
ENSMUSG00000101089	2610016A17Rik	0	0	0	0	0	0	0	0	0	0	0	0	0	0	0	0	0	0
ENSMUSG00000087013	2610027K06Rik	0	0	0	1	0	0	0	0	0	0	0	1	0	0	0	0	0	0
ENSMUSG00000085562	2610028E06Rik	0	0	0	0	0	0	0	0	0	0	0	0	0	0	0	0	0	0
ENSMUSG00000009114	2610028H24Rik	0	0	0	0	0	0	0	0	0	0	1	0	1	0	1	0	0	0
ENSMUSG00000087259	2610035D17Rik	62	70	62	39	67	26	53	46	62	60	45	48	171	113	58	29	18	39
ENSMUSG00000085555	2610035F20Rik	8	6	7	11	19	8	7	13	10	5	4	6	23	11	5	5	4	7
ENSMUSG00000079388	2610042L04Rik	0	0	0	0	0	0	0	0	0	0	0	0	0	0	0	0	0	0
ENSMUSG00000071302	2610044O15Rik8	431	348	418	365	554	347	298	375	336	231	254	278	748	401	409	339	350	344
ENSMUSG00000079671	2610203C22Rik	271	199	250	155	251	135	186	201	231	145	137	212	321	223	177	186	194	175
ENSMUSG00000085236	2610206C17Rik	0	5	0	0	3	2	0	0	0	0	1	0	5	1	0	0	2	0
ENSMUSG00000107479	2610300M13Rik	0	0	0	0	0	0	0	0	0	0	0	0	0	0	0	0	0	0
ENSMUSG00000059482	2610301B20Rik	368	424	390	425	688	334	275	319	383	388	334	444	534	334	275	292	291	312
ENSMUSG00000100164	2610306M01Rik	60	65	77	81	117	66	55	53	67	59	45	95	114	103	66	59	64	59
ENSMUSG00000097040	2610316D01Rik	0	1	0	0	0	0	0	0	0	0	0	0	0	0	0	0	0	0
ENSMUSG00000049916	2610318N02Rik	436	403	433	409	554	289	152	174	213	143	130	152	543	354	235	226	221	197
ENSMUSG00000010277	2610507B11Rik	10687	9822	11101	11506	17588	10460	9839	11507	11361	9989	9285	11767	17084	9654	9583	15640	15994	14028
ENSMUSG00000096001	2610528A11Rik	1	4	1	0	0	0	1	0	2	1	0	1	5	6	2	3	1	4
ENSMUSG00000028536	2610528J11Rik	0	0	0	0	0	0	0	0	0	0	0	0	1	0	1	1	2	1
ENSMUSG00000097180	2700038G22Rik	254	227	228	222	298	205	122	133	158	125	97	109	301	220	186	183	163	151
ENSMUSG00000041789	2700046A07Rik	0	0	0	0	0	0	0	0	0	0	0	0	0	0	0	0	0	0
ENSMUSG00000097787	2700046G09Rik	14	22	32	17	33	25	14	14	18	12	14	23	35	28	28	12	18	9
ENSMUSG00000034601	2700049A03Rik	870	803	911	812	1121	697	714	846	845	523	501	626	1236	797	713	710	687	637
ENSMUSG00000117042	2700054A10Rik	12	12	20	9	27	13	9	5	10	13	7	7	12	10	7	7	7	10
ENSMUSG00000024273	2700062C07Rik	405	370	453	419	719	440	406	470	521	375	316	406	645	454	329	372	409	407
ENSMUSG00000053080	2700081O15Rik	1090	863	1063	710	1163	645	629	656	669	376	326	379	1377	907	770	566	594	452
ENSMUSG00000100119	2700089I24Rik	0	0	0	0	0	0	0	0	0	0	0	0	0	0	0	0	0	0
ENSMUSG00000062198	2700097O09Rik	321	259	338	306	428	293	233	268	266	243	219	251	462	279	252	208	270	210
ENSMUSG00000098090	2700099C18Rik	76	59	74	116	204	94	80	81	93	74	80	75	127	75	86	102	95	78
ENSMUSG00000087497	2810001G20Rik	57	55	54	59	59	43	34	52	62	31	30	38	79	94	57	39	42	32
ENSMUSG00000031984	2810004N23Rik	2360	2158	2380	2185	3580	1958	2116	2291	2467	1581	1584	1888	3420	2326	2094	2064	1999	1964
ENSMUSG00000047635	2810006K23Rik	353	375	432	471	649	400	343	379	444	264	299	345	563	412	337	331	349	342
ENSMUSG00000099881	2810013P06Rik	121	98	95	102	155	99	48	65	69	49	48	70	173	124	89	53	73	78
ENSMUSG00000020491	2810021J22Rik	206	158	213	202	304	204	116	145	171	150	136	184	258	135	142	146	156	146
ENSMUSG00000049881	2810025M15Rik	1367	1229	1375	1082	1594	927	1230	1307	1430	1002	869	1107	1801	1302	997	811	806	796
ENSMUSG00000096995	2810029C07Rik	20	20	16	33	31	30	15	18	22	23	20	18	43	26	26	14	12	23
ENSMUSG00000037735	2810032G03Rik	0	0	0	0	0	0	0	0	2	0	0	0	0	0	0	0	0	0
ENSMUSG00000092178	2810047C21Rik1	5	0	2	0	2	1	0	0	0	0	0	0	3	0	0	0	0	1
ENSMUSG00000100891	2810049E08Rik	0	0	0	1	1	1	1	0	0	0	0	0	0	0	0	0	0	0
ENSMUSG00000086629	2810403D21Rik	71	68	79	70	116	66	66	74	82	75	70	63	178	113	94	83	103	94
ENSMUSG00000102046	2810404M03Rik	0	0	0	0	0	0	0	0	0	0	0	0	0	0	0	0	0	0
ENSMUSG00000018570	2810408A11Rik	5	10	13	12	20	7	2	6	7	6	6	5	17	10	7	9	3	5
ENSMUSG00000087213	2810408I11Rik	116	127	125	193	276	152	114	116	114	178	192	222	81	71	53	87	74	96
ENSMUSG00000100594	2810414N06Rik	75	57	71	58	112	52	38	55	57	46	46	57	81	60	35	39	34	33
ENSMUSG00000090260	2810442N19Rik	0	0	0	2	1	0	0	0	0	0	1	1	1	0	0	0	0	0
ENSMUSG00000100876	2810454H06Rik	12	11	13	18	25	10	8	7	4	5	9	8	20	7	14	5	7	9
ENSMUSG00000026227	2810459M11Rik	4	0	3	2	7	5	3	4	3	7	4	4	5	2	6	8	8	3
ENSMUSG00000084966	2810471M01Rik	0	0	0	0	0	0	0	0	0	0	0	0	0	0	0	0	0	0
ENSMUSG00000043833	2900005J15Rik	27	21	30	19	31	17	31	27	40	39	24	26	50	28	40	22	17	17
ENSMUSG00000102014	2900009J06Rik	3	2	6	3	11	1	7	7	5	6	1	6	5	15	4	3	4	1
ENSMUSG00000051339	2900026A02Rik	2231	2194	2390	1633	2505	1544	2032	2491	2248	2637	2510	3067	3941	2238	2302	1687	1588	1420
ENSMUSG00000115625	2900040C04Rik	0	0	0	0	0	0	0	0	0	0	0	0	0	0	0	0	0	0
ENSMUSG00000099696	2900052N01Rik	0	0	0	0	0	0	0	0	0	0	0	0	0	0	0	0	0	0
ENSMUSG00000117797	2900057B20Rik	0	0	0	0	0	0	0	0	0	0	0	0	0	0	0	0	0	0
ENSMUSG00000107722	2900060B14Rik	4	2	3	2	2	3	4	5	2	0	0	0	1	4	1	1	1	5
ENSMUSG00000097277	2900076A07Rik	71	62	68	48	88	61	44	52	50	63	39	62	115	72	68	61	59	54
ENSMUSG00000087038	2900079G21Rik	0	0	0	0	0	0	0	0	0	0	0	0	0	0	0	0	0	0
ENSMUSG00000030385	2900092C05Rik	0	0	0	0	0	0	0	0	0	0	0	0	0	0	0	0	0	0
ENSMUSG00000099632	2900093K20Rik	45	32	43	28	51	21	24	27	28	28	17	15	80	51	39	26	21	22
ENSMUSG00000102869	2900097C17Rik	10522	9991	10635	9732	14462	8724	6638	7430	7665	6412	5706	7184	15598	9500	8852	7434	7186	6733
ENSMUSG00000084885	3010001F23Rik	0	0	0	0	0	0	0	0	0	0	0	0	0	0	0	0	0	0
ENSMUSG00000085355	3010003L21Rik	49	30	51	38	61	53	32	56	55	32	15	17	68	51	52	36	42	40
ENSMUSG00000086254	3100003L05Rik	0	0	0	0	0	0	0	0	1	0	0	0	0	0	0	0	0	0
ENSMUSG00000085588	3110004A20Rik	0	0	0	0	0	0	0	0	0	0	0	0	0	0	0	0	0	0
ENSMUSG00000114649	3110006O06Rik	7	2	3	5	1	5	1	3	0	5	4	1	2	3	2	0	6	0
ENSMUSG00000026388	3110009E18Rik	77	56	83	47	71	65	41	53	67	36	20	35	68	57	26	37	38	31
ENSMUSG00000113331	3110009F21Rik	0	0	0	0	0	0	0	0	0	0	0	0	0	0	0	0	0	0
ENSMUSG00000114824	3110015C05Rik	0	0	0	0	0	0	0	0	0	0	0	0	0	0	0	0	0	0
ENSMUSG00000104861	3110039M20Rik	0	0	0	0	0	0	0	0	0	0	0	0	0	0	0	0	0	0
ENSMUSG00000114582	3110040M04Rik	0	1	0	0	0	0	0	0	0	0	0	0	0	0	0	0	0	0
ENSMUSG00000025102	3110040N11Rik	280	291	283	331	464	282	245	280	270	247	220	257	467	345	257	259	285	253
ENSMUSG00000097503	3110045C21Rik	31	25	19	20	40	21	39	35	41	47	39	34	39	22	21	24	25	12
ENSMUSG00000085622	3110056K07Rik	56	51	69	43	82	44	54	65	78	52	28	38	146	87	82	63	56	78
ENSMUSG00000074635	3110070M22Rik	24	15	18	21	37	29	7	17	27	19	12	18	42	36	19	30	31	22
ENSMUSG00000053553	3110082I17Rik	1955	1867	2174	2017	3148	1742	1742	2044	2215	1531	1267	1524	3384	2418	1789	1660	1686	1681
ENSMUSG00000086815	3110082J24Rik	0	0	0	0	0	0	0	0	0	0	0	0	0	0	0	0	0	0
ENSMUSG00000097303	3110083C13Rik	68	58	84	61	95	47	68	83	77	72	55	80	172	113	77	73	71	71
ENSMUSG00000085582	3110099E03Rik	2	4	2	1	4	0	0	1	0	0	0	2	0	1	0	0	0	0
ENSMUSG00000113434	3200001D21Rik	1	0	0	0	0	1	0	0	0	0	0	0	1	0	0	0	2	0
ENSMUSG00000063364	3300002I08Rik	33	36	50	28	55	30	39	30	18	24	16	40	47	21	15	29	29	18
ENSMUSG00000107585	3300002P13Rik	2	2	0	3	6	0	0	1	0	1	0	6	3	6	2	3	2	3
ENSMUSG00000096965	3300005D01Rik	40	46	60	35	68	48	76	83	85	117	97	110	63	60	55	58	76	77
ENSMUSG00000071540	3425401B19Rik	110	98	111	48	62	39	5	8	8	2	3	3	309	178	165	31	29	27
ENSMUSG00000089759	3632454L22Rik	1	2	0	1	1	1	0	0	0	2	0	0	0	0	0	0	0	0
ENSMUSG00000031125	3830403N18Rik	17	4	6	4	17	5	5	7	3	5	7	8	9	2	4	4	4	1
ENSMUSG00000033111	3830406C13Rik	763	648	757	689	923	607	645	761	868	714	645	818	1245	855	661	670	727	657
ENSMUSG00000114378	3830406C13Rik	13	3	5	0	7	6	10	4	6	8	9	8	24	14	13	13	7	9
ENSMUSG00000071181	3830408C21Rik	28	23	18	17	14	18	9	8	3	12	13	17	30	28	19	24	12	16
ENSMUSG00000031179	3830417A13Rik	0	0	0	0	0	0	0	0	0	0	0	0	0	0	0	0	0	0
ENSMUSG00000101731	3830432H09Rik	1	6	3	6	8	2	8	2	1	5	4	4	13	3	3	5	4	2
ENSMUSG00000038917	3930402G23Rik	0	0	2	0	1	2	0	0	0	5	3	5	1	1	0	1	0	3
ENSMUSG00000064202	4430402I18Rik	22	6	12	13	10	13	23	23	28	10	12	10	28	24	23	4	17	15
ENSMUSG00000075027	4631405J19Rik	0	0	0	0	0	0	0	0	0	0	0	0	0	0	0	0	0	0
ENSMUSG00000042579	4632404H12Rik	640	544	612	587	830	538	301	375	380	288	253	304	1054	601	620	458	538	428
ENSMUSG00000074024	4632427E13Rik	133	140	133	96	159	96	109	105	98	95	61	87	249	111	142	121	143	122
ENSMUSG00000097184	4632428C04Rik	1	2	0	2	1	4	0	0	0	1	1	0	1	0	0	0	2	0
ENSMUSG00000086943	4732414G09Rik	0	0	0	0	0	0	0	0	0	0	0	0	0	1	1	0	0	0
ENSMUSG00000097203	4732419C18Rik	2	3	1	2	2	1	2	4	0	4	3	0	1	0	0	2	1	0
ENSMUSG00000090031	4732440D04Rik	86	55	89	62	85	39	55	45	53	40	33	50	82	33	43	30	40	29
ENSMUSG00000053714	4732471J01Rik	20	17	23	34	46	26	17	15	19	21	18	22	49	27	26	26	24	21
ENSMUSG00000085421	4732490B19Rik	0	0	0	0	0	0	0	0	0	0	0	0	0	0	0	0	0	0
ENSMUSG00000097350	4732491K20Rik	43	49	66	49	91	48	47	58	71	72	58	60	69	50	58	54	50	38
ENSMUSG00000109089	4833411C07Rik	2	1	0	0	1	1	0	2	0	1	0	0	0	0	0	0	0	0
ENSMUSG00000097697	4833412C05Rik	0	0	0	0	0	0	0	0	0	0	0	0	0	0	0	0	0	0
ENSMUSG00000086015	4833417C18Rik	36	33	43	35	58	25	30	32	38	24	20	29	67	57	38	30	18	25
ENSMUSG00000085287	4833418N02Rik	4	8	4	7	11	11	7	12	7	9	7	4	14	13	12	3	4	4
ENSMUSG00000117401	4833419F23Rik	15	7	9	22	29	21	32	39	37	30	22	56	37	25	32	51	43	44
ENSMUSG00000062822	4833420G17Rik	1193	1158	1201	961	1495	917	857	1023	1095	714	619	804	2089	1238	1175	986	1029	907
ENSMUSG00000074782	4833422C13Rik	4	1	7	2	2	1	3	1	1	1	2	2	5	0	0	4	3	3
ENSMUSG00000097619	4833422M21Rik	5	4	6	5	5	5	1	7	4	4	3	5	11	2	3	2	2	4
ENSMUSG00000092171	4833427F10Rik	54	69	87	38	61	66	19	45	40	80	73	65	149	80	81	58	72	79
ENSMUSG00000032057	4833427G06Rik	0	0	0	1	0	0	0	2	1	3	1	1	2	1	0	2	0	0
ENSMUSG00000097074	4833428L15Rik	0	0	0	0	0	0	0	0	0	0	0	0	0	0	0	0	0	0
ENSMUSG00000118087	4833438C02Rik	158	155	125	132	202	110	75	85	108	100	62	79	239	183	130	118	152	126
ENSMUSG00000025871	4833439L19Rik	1687	1591	1716	1872	2870	1635	1518	1678	1744	1737	1609	2088	2511	1747	1416	1937	1868	1808
ENSMUSG00000097626	4921504A21Rik	0	0	0	0	0	0	0	0	0	0	0	0	0	0	0	0	0	0
ENSMUSG00000026734	4921504E06Rik	0	0	0	0	0	1	0	0	0	0	0	0	0	0	0	0	0	0
ENSMUSG00000097650	4921507G05Rik	1	1	2	0	1	2	2	1	1	0	0	1	3	3	0	2	0	0
ENSMUSG00000029828	4921507P07Rik	34	35	48	36	72	43	44	30	30	27	18	30	45	42	26	24	23	20
ENSMUSG00000027345	4921508D12Rik	0	0	0	0	0	0	0	0	0	1	0	0	0	0	0	0	0	0
ENSMUSG00000061525	4921509C19Rik	0	0	0	0	0	0	0	0	0	0	0	0	0	0	0	0	0	0
ENSMUSG00000114790	4921509O07Rik	0	0	0	1	0	0	0	0	0	0	0	0	0	0	0	0	0	0
ENSMUSG00000104585	4921511C10Rik	2	1	1	6	3	3	1	0	2	3	3	10	5	4	3	3	3	2
ENSMUSG00000049815	4921511C20Rik	0	0	0	0	0	0	0	0	0	0	0	0	0	0	0	0	0	0
ENSMUSG00000114136	4921511I17Rik	0	0	0	0	1	0	0	0	0	1	0	0	2	0	0	2	0	0
ENSMUSG00000044544	4921513I03Rik	0	0	0	0	0	0	0	0	1	1	0	0	0	0	0	0	0	0
ENSMUSG00000098150	4921515E04Rik	0	0	0	0	0	0	0	0	0	0	0	0	0	0	0	0	0	0
ENSMUSG00000049902	4921517D22Rik	21	19	22	20	29	12	19	22	21	13	13	11	32	16	18	17	4	14
ENSMUSG00000085851	4921518K17Rik	0	0	0	0	0	1	0	0	0	0	0	0	0	1	1	0	1	0
ENSMUSG00000036934	4921524J17Rik	481	496	532	563	864	452	500	561	594	349	365	469	770	481	424	468	495	527
ENSMUSG00000039540	4921524L21Rik	0	0	0	0	0	0	0	0	0	0	0	0	0	0	0	0	0	0
ENSMUSG00000113211	4921525O09Rik	0	0	0	1	0	0	0	0	0	0	0	0	0	0	0	0	0	0
ENSMUSG00000064299	4921528I07Rik	1	2	0	1	0	1	0	0	3	1	1	0	2	5	0	3	0	0
ENSMUSG00000085704	4921531C22Rik	40	27	30	33	55	31	25	30	32	27	31	36	55	40	26	23	29	28
ENSMUSG00000118333	4921531P14Rik	0	0	0	0	0	0	0	0	0	0	0	0	0	0	0	0	0	0
ENSMUSG00000117460	4921533I20Rik	0	0	0	0	0	0	0	0	0	0	0	0	0	0	0	0	0	0
ENSMUSG00000090255	4921534H16Rik	0	0	0	0	0	0	0	0	0	0	0	0	0	0	0	0	0	0
ENSMUSG00000020434	4921536K21Rik	29	20	16	19	35	16	10	16	23	34	23	42	22	20	16	18	18	21
ENSMUSG00000028520	4921539E11Rik	0	0	0	0	0	0	0	0	0	0	0	0	0	0	0	0	0	0
ENSMUSG00000108128	4922502N22Rik	0	0	0	0	0	0	0	0	0	0	0	0	0	0	0	0	0	0
ENSMUSG00000112444	4930401C15Rik	0	0	0	0	0	0	0	0	0	0	0	0	0	0	0	0	0	0
ENSMUSG00000086352	4930401G09Rik	0	0	0	0	0	0	0	0	0	0	0	0	0	0	0	0	0	0
ENSMUSG00000085528	4930401O10Rik	0	0	0	0	0	0	0	0	0	0	0	0	0	0	0	0	0	0
ENSMUSG00000087460	4930401O12Rik	0	0	0	0	0	0	0	0	0	0	0	0	0	0	0	0	0	0
ENSMUSG00000079421	4930402F06Rik	0	0	1	0	0	0	0	0	0	0	0	0	0	0	0	0	1	0
ENSMUSG00000108885	4930402F11Rik	0	0	0	0	0	0	0	0	0	0	0	0	0	0	0	0	0	0
ENSMUSG00000027309	4930402H24Rik	1158	1083	1229	986	1547	868	1006	1236	1137	1187	1130	1461	1747	1096	977	947	1021	903
ENSMUSG00000045797	4930402K13Rik	0	0	0	0	0	0	0	0	0	0	0	0	0	0	0	0	0	0
ENSMUSG00000087122	4930403D09Rik	0	0	0	0	2	0	0	1	0	2	0	0	1	3	0	0	0	1
ENSMUSG00000116611	4930404A05Rik	0	0	0	0	0	0	0	0	0	0	0	0	0	0	0	0	0	0
ENSMUSG00000113630	4930404H11Rik	1	1	0	0	0	0	0	1	2	1	0	2	0	2	1	0	0	0
ENSMUSG00000087354	4930404I05Rik	20	11	16	15	30	14	20	27	21	11	8	13	22	12	25	10	12	11
ENSMUSG00000020234	4930404N11Rik	245	232	261	191	338	171	254	260	291	218	208	224	385	279	263	259	212	223
ENSMUSG00000114412	4930405A10Rik	0	0	0	0	0	0	0	0	0	0	0	0	0	0	0	0	0	0
ENSMUSG00000086638	4930405A21Rik	9	2	14	9	11	8	7	8	7	7	3	7	11	14	6	2	4	10
ENSMUSG00000085940	4930405D11Rik	0	0	0	0	0	0	0	0	0	0	0	0	0	0	0	0	0	0
ENSMUSG00000110754	4930405J17Rik	0	0	0	0	0	0	0	0	0	0	0	0	0	0	0	0	0	0
ENSMUSG00000106602	4930405L22Rik	0	0	0	0	0	0	0	0	0	0	0	0	0	0	0	0	0	0
ENSMUSG00000090565	4930405O22Rik	0	2	1	0	0	1	0	0	0	0	0	0	0	1	0	1	1	2
ENSMUSG00000086923	4930406D18Rik	0	0	0	0	0	0	0	0	0	0	0	0	0	0	0	0	0	0
ENSMUSG00000086713	4930407G08Rik	0	0	0	0	0	0	0	0	0	0	0	0	0	0	0	0	0	0
ENSMUSG00000075524	4930407I10Rik	0	0	0	0	0	0	0	0	0	0	0	0	0	0	0	0	0	1
ENSMUSG00000112210	4930407I19Rik	0	0	0	0	0	0	0	0	0	0	0	0	0	0	0	0	0	0
ENSMUSG00000086221	4930412B13Rik	0	0	0	0	0	0	0	0	0	0	0	0	0	0	0	0	0	0
ENSMUSG00000102203	4930412E21Rik	0	0	0	0	0	0	0	0	0	0	0	0	0	0	0	0	0	0
ENSMUSG00000107144	4930413E15Rik	0	0	0	0	0	0	0	0	0	0	0	0	0	0	0	0	0	0
ENSMUSG00000115526	4930413F20Rik	0	0	0	0	0	0	0	0	0	0	0	0	0	0	0	0	0	0
ENSMUSG00000118204	4930414N06Rik	0	2	0	0	0	0	0	0	1	0	0	1	1	0	0	0	0	0
ENSMUSG00000035387	4930415L06Rik	0	0	0	0	0	0	0	0	0	0	0	0	0	0	0	0	0	0
ENSMUSG00000022993	4930415O20Rik	0	0	0	0	0	0	0	0	0	0	0	1	1	1	0	0	2	0
ENSMUSG00000108129	4930417O13Rik	0	1	1	2	2	0	1	0	5	0	1	0	1	1	1	0	1	2
ENSMUSG00000071818	4930417O22Rik	0	0	0	0	0	0	0	0	0	0	0	0	0	0	0	0	0	0
ENSMUSG00000087625	4930419G24Rik	0	0	0	0	0	0	0	0	0	0	0	0	0	0	0	0	0	0
ENSMUSG00000100281	4930422M22Rik	9	3	0	4	13	2	3	4	8	15	12	7	7	5	3	1	4	2
ENSMUSG00000112753	4930423D24Rik	0	0	0	0	0	0	0	0	0	0	0	0	0	0	0	0	0	0
ENSMUSG00000086066	4930423M02Rik	0	0	0	0	0	0	0	0	0	0	0	0	0	0	0	0	0	0
ENSMUSG00000106880	4930425K10Rik	0	0	0	0	0	0	0	0	0	0	0	0	0	0	0	0	0	0
ENSMUSG00000107396	4930425L21Rik	0	0	0	0	0	0	0	0	0	0	0	0	0	0	0	0	0	0
ENSMUSG00000105838	4930425O10Rik	0	0	0	1	0	0	0	0	0	0	0	0	0	0	0	0	0	0
ENSMUSG00000043168	4930426D05Rik	0	0	0	0	0	0	0	0	0	0	0	0	0	0	0	0	0	0
ENSMUSG00000026736	4930426L09Rik	12	16	9	11	6	8	6	5	7	6	7	3	13	10	13	10	5	2
ENSMUSG00000107073	4930428D20Rik	0	0	0	0	0	0	0	0	0	0	0	0	0	0	0	0	0	0
ENSMUSG00000112967	4930428E07Rik	0	0	0	0	0	0	0	0	0	0	0	0	0	0	0	0	0	0
ENSMUSG00000106333	4930428O21Rik	9	5	2	9	6	6	4	4	5	2	2	5	8	3	3	5	3	6
ENSMUSG00000115286	4930429C20Rik	0	0	0	0	0	0	0	0	0	0	0	0	0	0	0	0	0	0
ENSMUSG00000104956	4930429D17Rik	0	0	0	0	0	0	0	0	0	0	0	0	0	0	0	0	0	0
ENSMUSG00000086918	4930429F24Rik	0	0	0	0	0	3	1	0	0	2	3	0	1	3	0	0	0	0
ENSMUSG00000108530	4930429H19Rik	0	0	0	0	0	0	0	0	0	0	0	0	0	0	0	0	0	0
ENSMUSG00000046567	4930430F08Rik	709	618	665	661	1027	616	634	659	659	577	560	672	1064	593	563	635	657	623
ENSMUSG00000115474	4930430F21Rik	0	0	0	0	0	0	0	0	0	0	0	0	0	0	0	0	0	0
ENSMUSG00000111494	4930431F10Rik	3	2	3	2	8	0	1	0	5	4	3	0	2	2	1	1	6	2
ENSMUSG00000062496	4930431F12Rik	0	3	1	1	5	0	4	3	2	3	4	2	0	1	0	1	3	1
ENSMUSG00000075042	4930431P03Rik	0	0	0	0	0	1	0	0	0	0	0	0	0	0	0	0	0	0
ENSMUSG00000115709	4930431P22Rik	0	0	0	0	0	0	0	0	0	0	0	0	0	0	0	0	0	0
ENSMUSG00000115727	4930432J09Rik	0	0	0	0	0	0	2	0	0	1	0	0	0	0	0	0	0	0
ENSMUSG00000008129	4930432K21Rik	237	195	248	223	385	200	178	152	197	150	133	183	280	187	148	153	141	150
ENSMUSG00000087037	4930432L08Rik	0	0	0	0	0	0	0	0	0	0	0	0	0	0	0	0	0	0
ENSMUSG00000074248	4930432M17Rik	0	0	0	0	0	0	0	0	0	0	0	0	0	0	0	0	0	0
ENSMUSG00000112846	4930432O09Rik	0	0	0	0	0	0	0	0	0	0	0	0	0	0	0	0	0	0
ENSMUSG00000102699	4930433B08Rik	0	0	0	0	0	0	0	0	0	0	0	0	0	0	0	0	0	0
ENSMUSG00000091692	4930433I11Rik	0	0	0	0	0	0	0	0	0	0	0	0	0	0	0	0	0	0
ENSMUSG00000042360	4930433N12Rik	0	0	0	1	0	1	0	2	1	0	1	0	0	0	0	2	0	0
ENSMUSG00000115304	4930434J06Rik	0	0	0	0	0	0	0	0	0	0	0	0	0	0	0	0	0	0
ENSMUSG00000114290	4930435F18Rik	17	17	21	21	37	16	8	14	21	24	20	33	28	12	6	26	22	14
ENSMUSG00000105688	4930437M23Rik	0	0	0	0	0	0	0	0	0	0	0	0	0	0	0	0	0	0
ENSMUSG00000069873	4930438A08Rik	3	3	3	5	9	10	0	0	1	7	2	12	0	0	0	1	2	2
ENSMUSG00000093472	4930438E09Rik	0	0	0	0	0	0	0	0	0	0	0	0	0	0	0	0	0	0
ENSMUSG00000100518	4930440C22Rik	0	0	0	0	0	0	0	0	0	0	0	0	0	0	0	0	0	0
ENSMUSG00000085431	4930440I19Rik	0	0	0	7	7	1	0	0	1	3	11	1	0	0	0	1	0	0
ENSMUSG00000108669	4930441H08Rik	0	0	0	0	0	0	0	0	0	0	0	0	0	0	0	0	0	0
ENSMUSG00000085405	4930441J16Rik	0	0	0	0	0	0	0	0	0	0	0	0	0	0	0	0	0	0
ENSMUSG00000087609	4930442J19Rik	0	0	0	0	0	0	0	0	0	0	0	0	0	0	0	0	0	0
ENSMUSG00000087223	4930442L01Rik	0	0	0	0	0	0	0	0	0	0	0	0	0	0	0	0	0	0
ENSMUSG00000086969	4930443O20Rik	0	0	0	0	0	0	0	0	0	0	0	0	0	0	0	0	0	0
ENSMUSG00000069712	4930444G20Rik	0	0	0	0	2	6	0	2	1	1	0	3	0	0	1	0	1	0
ENSMUSG00000067795	4930444P10Rik	1	3	2	0	2	0	1	1	1	2	0	0	1	0	0	1	1	0
ENSMUSG00000097738	4930445N18Rik	5	4	5	3	4	6	4	4	5	1	5	3	14	3	10	5	1	2
ENSMUSG00000022288	4930447A16Rik	0	0	0	0	0	0	0	0	0	0	0	0	0	0	0	0	0	0
ENSMUSG00000021098	4930447C04Rik	0	1	0	0	0	1	0	0	0	0	0	1	0	0	0	0	0	0
ENSMUSG00000102224	4930447F24Rik	463	468	464	108	136	100	141	134	158	137	127	137	395	230	177	49	80	52
ENSMUSG00000115609	4930447J18Rik	0	0	0	0	0	0	0	0	0	0	0	0	0	0	0	0	0	0
ENSMUSG00000113591	4930447K03Rik	2	2	2	1	0	0	0	0	0	0	0	0	1	1	0	0	0	0
ENSMUSG00000106583	4930447N08Rik	0	0	0	0	0	0	0	0	0	0	0	0	0	0	0	0	0	0
ENSMUSG00000113644	4930448C13Rik	1	0	0	0	2	1	0	0	2	1	1	1	2	0	0	0	2	0
ENSMUSG00000097463	4930448E22Rik	0	1	1	0	1	1	3	1	2	2	1	0	1	3	1	1	0	0
ENSMUSG00000113470	4930448F12Rik	0	0	0	0	0	0	0	0	0	0	0	0	0	0	0	0	0	0
ENSMUSG00000089879	4930448H16Rik	0	0	0	0	0	0	0	0	0	0	0	0	0	0	0	0	0	0
ENSMUSG00000104072	4930448I06Rik	0	0	0	0	0	0	0	0	0	0	0	0	0	0	0	0	0	0
ENSMUSG00000104870	4930448I18Rik	0	0	0	0	0	0	0	0	0	0	0	0	0	0	0	0	0	0
ENSMUSG00000082843	4930448K20Rik	0	0	0	0	0	0	0	0	0	0	0	0	0	0	0	0	0	0
ENSMUSG00000115676	4930449C09Rik	0	0	0	0	0	0	0	0	0	0	0	0	0	0	0	0	0	0
ENSMUSG00000022116	4930449E01Rik	0	0	0	0	0	0	0	0	0	0	0	0	0	0	0	0	0	0
ENSMUSG00000117684	4930449E18Rik	0	0	0	0	0	0	0	0	0	0	0	0	0	0	0	0	0	0
ENSMUSG00000079093	4930449I24Rik	0	0	0	0	0	0	0	0	0	0	0	0	0	0	0	0	0	0
ENSMUSG00000069223	4930451E10Rik	1	0	1	2	4	0	3	4	3	0	0	0	3	1	2	2	0	4
ENSMUSG00000022543	4930451G09Rik	14	12	10	7	24	13	13	10	8	14	7	11	22	12	15	7	10	9
ENSMUSG00000045989	4930451I11Rik	0	0	0	0	0	0	0	0	0	0	0	0	0	0	0	0	0	0
ENSMUSG00000117264	4930452A19Rik	0	0	0	0	0	0	0	0	0	0	0	0	0	0	0	0	0	0
ENSMUSG00000021747	4930452B06Rik	1	0	0	0	0	0	0	0	0	0	0	0	0	0	0	0	0	0
ENSMUSG00000115422	4930452G13Rik	0	2	0	0	3	2	1	1	0	2	0	2	1	0	3	1	0	0
ENSMUSG00000099933	4930452N14Rik	0	0	0	0	0	0	0	0	0	0	0	0	0	0	0	0	0	0
ENSMUSG00000087358	4930453H23Rik	0	0	0	0	0	0	0	0	0	0	0	0	0	0	0	0	0	0
ENSMUSG00000109215	4930453L07Rik	0	0	0	0	0	0	0	0	0	0	0	0	0	0	0	0	0	0
ENSMUSG00000059920	4930453N24Rik	988	863	1011	1182	1894	1072	848	1001	1061	912	854	1090	1446	947	759	1167	1308	1197
ENSMUSG00000097898	4930455B14Rik	0	0	0	0	0	0	0	0	0	0	0	0	0	0	0	0	0	0
ENSMUSG00000112654	4930455C13Rik	8	6	3	1	1	0	1	0	1	2	1	3	6	0	2	0	7	3
ENSMUSG00000085761	4930455G09Rik	40	47	51	47	63	37	29	25	44	106	84	119	86	47	42	58	54	50
ENSMUSG00000080907	4930455H04Rik	0	0	0	0	0	0	0	0	0	0	0	0	0	0	0	0	0	0
ENSMUSG00000114384	4930455J16Rik	0	0	0	0	0	0	0	0	0	3	1	0	0	0	0	1	2	0
ENSMUSG00000078618	4930456L15Rik	0	0	0	0	0	0	0	0	0	0	0	0	0	0	0	0	0	0
ENSMUSG00000112762	4930459C07Rik	0	0	0	0	0	2	0	3	0	0	1	3	0	0	0	3	0	1
ENSMUSG00000105234	4930459L07Rik	0	0	0	0	0	0	0	0	0	0	0	0	0	0	0	0	0	0
ENSMUSG00000097651	4930461G14Rik	0	2	0	0	0	0	1	2	0	0	0	0	1	1	1	0	0	2
ENSMUSG00000020033	4930463O16Rik	0	0	0	0	0	0	0	0	1	0	0	0	0	0	0	0	0	0
ENSMUSG00000056682	4930465K10Rik	0	0	0	2	1	0	0	0	1	0	1	0	0	0	0	0	1	0
ENSMUSG00000085641	4930465M20Rik	0	0	0	0	0	0	0	0	0	0	0	0	0	0	0	0	0	0
ENSMUSG00000096265	4930467E23Rik	0	0	0	0	1	0	0	0	0	0	0	0	0	0	0	0	0	1
ENSMUSG00000114879	4930467J12Rik	0	0	0	0	0	0	0	0	0	0	0	0	0	0	0	0	0	0
ENSMUSG00000097370	4930467K11Rik	0	0	0	0	0	0	0	0	0	0	0	0	0	0	0	0	0	0
ENSMUSG00000085684	4930469K13Rik	1	0	1	1	1	0	0	2	3	0	5	5	3	2	0	0	1	4
ENSMUSG00000116975	4930470H14Rik	49	34	28	46	59	52	25	44	31	51	35	52	47	22	24	35	48	35
ENSMUSG00000110406	4930470O06Rik	0	0	0	0	0	0	0	0	0	0	0	0	0	0	0	0	0	0
ENSMUSG00000043583	4930470P17Rik	0	1	0	0	0	0	0	0	0	0	0	0	0	0	0	0	0	0
ENSMUSG00000091686	4930471C04Rik	0	0	0	0	0	0	0	0	0	0	0	0	0	0	0	0	0	0
ENSMUSG00000112716	4930471E19Rik	5	9	13	11	24	13	10	12	13	20	31	16	15	4	7	11	7	8
ENSMUSG00000117852	4930471G03Rik	0	0	0	0	1	0	0	0	0	0	0	0	0	0	0	0	0	0
ENSMUSG00000114509	4930471G24Rik	0	0	0	0	0	0	0	0	0	0	0	0	0	0	0	0	0	0
ENSMUSG00000117137	4930471L23Rik	0	0	0	0	0	0	0	0	0	0	0	0	0	0	0	0	0	0
ENSMUSG00000097693	4930471M09Rik	1	0	0	1	3	1	0	0	1	1	2	0	2	4	1	0	0	0
ENSMUSG00000060029	4930473A02Rik	6	3	2	1	4	1	1	0	2	0	0	1	2	0	0	4	0	7
ENSMUSG00000113087	4930473H19Rik	0	0	0	0	0	0	0	1	1	0	0	0	0	0	0	0	0	0
ENSMUSG00000112484	4930473O22Rik	0	0	0	0	0	0	0	0	0	0	0	0	0	0	0	0	0	0
ENSMUSG00000117473	4930474G06Rik	0	0	0	0	0	0	0	0	0	0	0	0	0	0	0	0	0	0
ENSMUSG00000115001	4930474H20Rik	0	0	0	0	0	0	0	0	0	0	0	0	0	0	0	0	0	0
ENSMUSG00000117328	4930474M22Rik	0	0	0	0	0	0	0	0	0	0	0	0	0	0	0	0	0	0
ENSMUSG00000096405	4930474N05Rik	5	1	2	3	5	3	2	2	1	4	3	3	3	1	2	2	5	1
ENSMUSG00000113210	4930474N09Rik	0	0	0	0	0	0	0	0	0	0	0	0	0	0	1	0	0	0
ENSMUSG00000112155	4930477N07Rik	0	0	0	0	0	0	0	0	0	0	0	0	0	0	0	0	0	0
ENSMUSG00000116628	4930478L05Rik	0	0	0	0	0	0	0	0	1	0	0	0	0	0	0	0	0	0
ENSMUSG00000106762	4930478P22Rik	0	0	0	0	0	0	0	0	0	0	0	0	0	1	0	0	0	0
ENSMUSG00000085238	4930479D17Rik	1	0	3	0	1	0	0	1	0	0	1	1	0	0	1	1	0	0
ENSMUSG00000035651	4930480E11Rik	0	0	0	0	0	0	0	0	0	0	0	0	0	0	0	0	0	0
ENSMUSG00000090160	4930480K15Rik	0	0	0	0	0	0	0	0	0	0	0	0	0	0	0	0	0	0
ENSMUSG00000113115	4930480M12Rik	0	0	0	0	0	0	0	0	0	0	0	0	0	0	0	0	0	0
ENSMUSG00000086938	4930481A15Rik	5	4	6	8	8	2	9	2	4	0	2	1	9	7	2	3	0	4
ENSMUSG00000047938	4930483J18Rik	0	2	0	0	2	0	1	1	2	1	1	0	0	2	1	0	1	0
ENSMUSG00000086241	4930483K19Rik	2	1	7	1	3	0	4	0	1	5	2	0	0	4	2	0	6	5
ENSMUSG00000109816	4930483O08Rik	0	0	0	0	0	0	0	0	0	1	0	0	0	0	0	0	0	0
ENSMUSG00000112832	4930484H19Rik	0	0	0	0	0	0	0	0	0	0	0	0	0	0	0	0	0	0
ENSMUSG00000112493	4930486F22Rik	0	0	0	0	0	0	0	0	0	0	0	0	0	0	0	0	0	0
ENSMUSG00000089914	4930486I03Rik	0	0	0	0	0	0	0	0	0	0	0	0	0	0	0	0	0	0
ENSMUSG00000050345	4930486L24Rik	0	0	0	0	0	0	1	2	2	2	0	1	3	1	0	0	0	0
ENSMUSG00000106932	4930487D11Rik	0	0	0	0	0	0	0	0	0	0	0	0	0	0	0	0	0	0
ENSMUSG00000092578	4930488B22Rik	0	0	0	0	1	0	0	0	0	0	0	0	0	0	0	0	0	0
ENSMUSG00000117391	4930500A05Rik	0	0	0	0	0	0	0	0	0	0	0	1	0	0	0	0	0	0
ENSMUSG00000107214	4930500F04Rik	0	0	0	0	0	0	0	0	0	0	0	0	0	0	0	0	0	0
ENSMUSG00000116976	4930500H12Rik	0	0	0	0	0	0	0	0	0	0	0	0	0	0	0	0	0	0
ENSMUSG00000106056	4930500L23Rik	0	0	1	0	0	0	0	0	0	0	0	0	2	0	0	0	0	0
ENSMUSG00000111303	4930502A04Rik	0	0	0	0	0	0	0	0	0	0	0	0	0	0	0	0	0	0
ENSMUSG00000086799	4930502E09Rik	0	3	0	0	1	1	0	0	2	1	1	0	1	1	0	0	0	0
ENSMUSG00000055555	4930502E18Rik	0	0	0	0	0	0	0	0	2	0	0	0	1	0	0	0	0	0
ENSMUSG00000048652	4930503B20Rik	0	0	0	0	0	0	0	0	1	0	0	0	0	0	0	0	0	0
ENSMUSG00000090202	4930503B20Rik	0	0	0	0	0	0	0	0	0	0	0	0	0	0	0	0	0	0
ENSMUSG00000072595	4930503E14Rik	0	0	0	0	0	0	0	0	0	0	0	0	0	0	0	0	0	0
ENSMUSG00000112364	4930503E24Rik	0	0	0	0	0	0	1	0	0	0	0	0	1	0	0	0	0	0
ENSMUSG00000115751	4930503F20Rik	0	0	0	0	0	0	0	0	0	0	0	0	0	0	0	0	0	0
ENSMUSG00000044906	4930503L19Rik	639	640	708	799	1338	810	841	978	855	830	774	1022	914	490	525	766	743	740
ENSMUSG00000103692	4930503O07Rik	0	0	0	0	0	0	0	0	0	0	0	0	0	0	0	0	0	0
ENSMUSG00000116167	4930504C09Rik	0	0	0	0	0	0	0	0	0	0	0	0	0	0	0	0	0	0
ENSMUSG00000040919	4930505A04Rik	2	0	0	0	0	0	0	0	0	0	0	0	2	0	0	0	0	0
ENSMUSG00000093551	4930505G20Rik	0	0	0	0	0	0	0	0	0	0	0	0	0	0	0	0	0	0
ENSMUSG00000109414	4930505K13Rik	0	0	0	0	0	0	0	0	0	0	0	0	0	0	0	0	0	0
ENSMUSG00000085740	4930505K14Rik	0	0	0	0	1	0	0	0	0	0	0	0	1	0	0	0	0	0
ENSMUSG00000097690	4930505N22Rik	5	2	6	5	11	7	4	7	6	4	6	4	10	13	2	3	6	11
ENSMUSG00000087478	4930506C21Rik	10	13	9	24	16	11	9	15	16	22	22	21	27	9	11	14	13	12
ENSMUSG00000097129	4930507D05Rik	11	8	3	8	5	1	1	8	3	2	2	0	8	5	6	3	3	2
ENSMUSG00000086703	4930507D10Rik	0	0	0	0	0	0	0	0	0	0	0	0	0	0	0	0	0	0
ENSMUSG00000096986	4930509E16Rik	18	15	5	8	8	11	12	16	10	14	13	9	25	9	15	10	6	12
ENSMUSG00000096959	4930509G22Rik	11	11	4	15	19	11	12	9	9	7	6	12	18	11	13	15	15	13
ENSMUSG00000102362	4930509J09Rik	0	0	0	0	0	0	0	0	0	0	0	0	0	0	0	0	0	0
ENSMUSG00000087137	4930509K18Rik	0	0	0	0	0	0	0	0	0	0	0	0	0	0	0	0	0	0
ENSMUSG00000097841	4930511A02Rik	0	0	0	0	0	0	0	0	0	0	0	0	0	0	0	0	0	0
ENSMUSG00000108187	4930511E03Rik	0	0	0	0	0	0	0	0	0	0	0	0	0	0	0	0	0	0
ENSMUSG00000086607	4930511M06Rik	6	15	20	20	48	15	19	25	12	39	18	24	26	15	13	20	27	15
ENSMUSG00000107622	4930512J16Rik	42	56	47	60	74	45	43	47	44	122	113	109	42	27	15	10	22	30
ENSMUSG00000062511	4930512M02Rik	0	0	2	3	1	0	2	0	0	2	2	0	1	0	0	1	0	2
ENSMUSG00000106741	4930513D17Rik	0	0	0	0	0	0	0	0	0	0	0	0	0	0	0	0	0	0
ENSMUSG00000116491	4930513L16Rik	0	0	0	0	0	0	0	0	0	0	0	0	0	0	0	0	1	0
ENSMUSG00000074136	4930513N10Rik	84	81	87	73	104	71	84	94	73	41	36	54	95	51	80	58	71	66
ENSMUSG00000031270	4930513O06Rik	1	0	0	0	0	0	0	0	0	0	0	0	0	0	0	0	0	0
ENSMUSG00000087045	4930515B02Rik	0	0	0	0	0	0	0	2	0	1	0	0	0	0	0	0	0	0
ENSMUSG00000092183	4930515G01Rik	24	14	17	13	29	13	14	18	16	13	17	17	24	21	29	30	16	20
ENSMUSG00000085157	4930515L19Rik	0	0	0	0	0	0	0	0	0	0	0	0	0	0	0	0	0	0
ENSMUSG00000085496	4930517E11Rik	0	0	0	0	0	0	0	0	0	0	0	0	0	0	0	0	0	0
ENSMUSG00000116767	4930517M08Rik	0	0	0	0	0	0	0	0	0	0	0	0	0	0	0	0	0	0
ENSMUSG00000110310	4930518J21Rik	0	0	0	0	0	0	0	0	0	0	0	0	0	0	0	0	0	0
ENSMUSG00000113652	4930518P08Rik	0	0	0	0	0	0	0	0	0	0	0	0	0	0	0	0	0	0
ENSMUSG00000086263	4930519D14Rik	0	0	0	0	0	0	0	0	0	0	0	0	0	0	0	0	0	0
ENSMUSG00000031325	4930519F16Rik	0	0	1	0	0	0	1	0	0	1	1	0	1	0	1	0	0	0
ENSMUSG00000101584	4930519F24Rik	0	0	0	0	0	0	0	0	0	0	0	0	0	0	0	0	0	0
ENSMUSG00000029564	4930519G04Rik	0	1	3	2	3	1	1	3	2	1	1	0	1	0	5	0	0	0
ENSMUSG00000105185	4930519H02Rik	0	0	0	0	0	0	0	0	0	0	0	0	0	0	0	0	0	0
ENSMUSG00000114953	4930519K11Rik	0	0	0	0	0	0	0	0	0	0	0	0	0	0	0	0	0	0
ENSMUSG00000074039	4930520O04Rik	28	30	17	32	40	34	25	20	22	25	13	16	44	34	39	19	31	16
ENSMUSG00000113463	4930520P13Rik	0	0	0	0	0	0	0	0	0	0	0	0	0	0	0	0	0	0
ENSMUSG00000101701	4930521E06Rik	0	0	0	0	0	0	0	0	0	0	0	0	0	0	0	0	0	0
ENSMUSG00000071591	4930521O11Rik	0	1	0	3	0	1	0	1	7	0	3	1	1	2	0	1	0	1
ENSMUSG00000112899	4930521O17Rik	0	0	0	0	0	0	0	0	0	0	0	0	0	0	0	0	0	0
ENSMUSG00000060491	4930522H14Rik	0	0	0	0	0	0	0	0	0	0	0	0	0	0	0	0	0	0
ENSMUSG00000072762	4930522L14Rik	213	188	239	166	257	165	136	163	171	122	107	141	331	185	199	122	182	131
ENSMUSG00000086947	4930522O17Rik	0	0	0	0	0	0	0	0	0	0	0	0	0	0	0	0	0	0
ENSMUSG00000090394	4930523C07Rik	0	0	0	3	1	0	3	0	4	1	3	2	0	1	0	1	1	0
ENSMUSG00000115177	4930523O13Rik	0	0	0	0	0	0	0	0	0	0	0	0	0	0	0	0	0	0
ENSMUSG00000020299	4930524B15Rik	2	0	0	0	0	0	0	1	0	0	0	1	0	0	0	0	0	0
ENSMUSG00000107217	4930524B17Rik	0	0	0	0	0	0	0	0	0	0	0	0	0	0	0	0	0	0
ENSMUSG00000115320	4930524C18Rik	0	0	0	0	0	0	0	0	0	0	0	0	0	0	0	0	0	0
ENSMUSG00000118392	4930524O05Rik	0	0	0	0	0	0	0	0	0	0	0	0	0	0	0	0	0	0
ENSMUSG00000098627	4930524O08Rik	0	0	0	0	0	0	0	0	0	0	0	0	0	0	0	0	0	0
ENSMUSG00000112497	4930525C09Rik	0	0	0	0	0	0	0	0	0	0	0	0	0	0	0	0	0	0
ENSMUSG00000097276	4930525G20Rik	5	5	2	6	7	2	1	2	1	3	3	6	5	5	8	3	1	2
ENSMUSG00000097091	4930526L06Rik	0	1	0	0	1	0	0	0	1	0	1	1	1	1	1	0	1	0
ENSMUSG00000115324	4930527F14Rik	4	4	6	10	7	5	7	4	3	3	4	6	11	12	11	7	8	10
ENSMUSG00000117554	4930527G23Rik	0	0	0	0	0	0	0	0	0	0	0	0	0	0	0	0	0	0
ENSMUSG00000097502	4930528D03Rik	1	2	4	0	3	1	0	4	1	1	3	0	1	7	1	0	0	1
ENSMUSG00000084909	4930528G23Rik	0	0	0	0	0	0	0	0	0	0	0	1	0	0	0	0	0	0
ENSMUSG00000107681	4930528H21Rik	0	0	0	0	0	0	0	0	0	0	0	0	0	0	0	0	0	0
ENSMUSG00000087309	4930528P14Rik	0	0	0	0	0	0	0	0	0	0	0	0	0	0	0	0	0	0
ENSMUSG00000086377	4930529C04Rik	0	0	0	0	0	0	1	0	0	0	0	0	0	0	0	0	0	0
ENSMUSG00000115271	4930529K09Rik	0	0	0	0	0	0	0	0	0	0	0	0	0	0	0	0	0	0
ENSMUSG00000113906	4930529N20Rik	0	0	0	0	0	0	0	0	0	0	0	0	0	0	0	0	0	0
ENSMUSG00000112201	4930532I03Rik	0	0	0	0	0	0	0	0	0	0	0	0	0	0	0	0	0	0
ENSMUSG00000100221	4930532M18Rik	0	0	0	0	0	0	0	0	0	0	0	0	0	0	0	0	0	0
ENSMUSG00000084798	4930533B01Rik	0	0	0	0	0	0	0	0	0	0	0	0	0	0	0	0	0	0
ENSMUSG00000108803	4930533N22Rik	386	373	410	329	573	323	243	312	295	289	266	291	648	398	392	412	376	374
ENSMUSG00000100589	4930533P14Rik	0	0	0	0	0	0	0	0	0	0	0	0	0	0	0	0	0	0
ENSMUSG00000111544	4930534H03Rik	7	2	3	7	10	3	7	4	2	5	8	4	10	9	7	1	4	5
ENSMUSG00000093619	4930535L15Rik	0	0	0	1	0	0	0	1	0	0	0	1	0	0	0	0	0	0
ENSMUSG00000085516	4930538E20Rik	0	0	0	0	0	0	0	0	1	0	0	0	0	0	0	0	0	0
ENSMUSG00000115719	4930538L07Rik	0	1	0	0	0	1	0	0	2	0	0	0	0	0	0	0	0	0
ENSMUSG00000105765	4930539C22Rik	0	0	0	0	0	0	0	0	0	0	0	0	0	0	0	0	0	0
ENSMUSG00000048905	4930539E08Rik	0	1	4	3	4	5	0	2	3	7	3	6	1	2	0	31	33	31
ENSMUSG00000097032	4930539J05Rik	14	9	17	16	24	12	6	9	9	4	6	7	24	9	5	7	9	8
ENSMUSG00000103116	4930539M17Rik	0	0	0	0	0	0	0	0	0	0	0	0	0	0	0	0	0	0
ENSMUSG00000111299	4930540M03Rik	0	0	0	0	0	0	0	0	0	0	0	0	0	0	0	0	0	0
ENSMUSG00000116848	4930542D17Rik	1	1	6	6	2	2	1	0	1	4	2	3	4	1	9	5	2	3
ENSMUSG00000117085	4930542M03Rik	0	0	0	0	0	0	0	0	0	0	0	0	0	0	0	0	0	0
ENSMUSG00000110009	4930543E12Rik	0	0	0	0	0	0	0	0	0	0	0	0	0	0	0	0	0	0
ENSMUSG00000110037	4930543N07Rik	0	0	0	0	0	0	0	0	0	0	0	0	0	0	0	0	0	0
ENSMUSG00000087279	4930544D05Rik	0	0	0	0	0	0	0	0	0	0	0	0	0	0	0	1	0	0
ENSMUSG00000036463	4930544G11Rik	0	0	0	0	0	0	0	0	0	0	0	0	0	0	0	0	0	0
ENSMUSG00000051758	4930544M13Rik	0	0	0	0	0	0	0	0	0	0	0	0	0	0	0	0	0	3
ENSMUSG00000117615	4930545E07Rik	0	0	0	0	0	0	0	0	0	0	0	0	0	0	0	0	0	0
ENSMUSG00000112157	4930545H06Rik	0	0	0	0	0	0	0	0	0	0	0	0	0	0	0	0	0	0
ENSMUSG00000085247	4930545L23Rik	0	0	0	0	0	0	0	0	0	0	0	0	0	0	0	0	0	0
ENSMUSG00000024546	4930546C10Rik	0	0	0	0	0	0	0	1	0	0	0	0	0	0	0	0	0	0
ENSMUSG00000111767	4930546K05Rik	0	0	0	0	0	0	1	0	1	1	2	0	0	0	0	0	0	1
ENSMUSG00000086687	4930547E08Rik	0	0	0	1	1	0	0	0	0	1	0	0	0	0	0	0	0	0
ENSMUSG00000116894	4930547E14Rik	0	0	0	0	0	0	0	0	0	0	0	0	0	0	0	0	0	0
ENSMUSG00000051198	4930548G14Rik	0	0	0	0	0	0	0	0	0	0	0	0	0	0	0	0	0	0
ENSMUSG00000029138	4930548H24Rik	2	7	0	7	6	3	3	5	4	4	5	0	2	3	0	2	4	3
ENSMUSG00000116615	4930548J01Rik	0	0	0	0	0	0	0	0	0	0	0	0	0	0	0	0	0	0
ENSMUSG00000086257	4930548K13Rik	0	0	0	0	0	0	0	0	0	0	0	0	0	0	0	0	0	0
ENSMUSG00000114048	4930549C15Rik	0	0	0	0	0	0	0	0	0	0	0	0	0	0	0	0	0	0
ENSMUSG00000118134	4930549G23Rik	3	12	6	3	3	6	2	7	4	0	3	2	3	1	2	1	4	5
ENSMUSG00000005131	4930550C14Rik	20	23	19	31	47	28	25	24	16	22	10	23	38	23	26	16	14	13
ENSMUSG00000097361	4930550C17Rik	0	0	0	0	0	0	0	0	0	0	0	0	0	0	0	0	0	0
ENSMUSG00000046180	4930550L24Rik	1	1	1	2	5	1	6	7	10	3	5	5	0	0	0	0	0	0
ENSMUSG00000089717	4930552N02Rik	0	0	0	0	0	0	0	0	0	0	0	0	0	0	0	0	0	0
ENSMUSG00000116907	4930553E22Rik	0	0	0	0	0	0	0	0	0	0	0	0	0	0	0	0	0	0
ENSMUSG00000116983	4930553J12Rik	0	0	0	0	0	0	0	0	0	0	0	0	0	0	0	0	0	0
ENSMUSG00000106791	4930553P18Rik	1	1	0	0	0	0	0	1	0	0	0	0	1	0	0	0	0	0
ENSMUSG00000099724	4930554C24Rik	0	0	2	4	0	0	0	3	1	0	0	0	0	0	1	0	0	0
ENSMUSG00000085452	4930554G24Rik	0	0	0	0	0	0	0	0	0	0	0	0	0	0	0	0	0	0
ENSMUSG00000097682	4930554H23Rik	0	1	1	0	1	2	0	1	0	0	0	0	0	0	0	0	0	1
ENSMUSG00000118047	4930554I06Rik	0	1	2	0	5	0	2	0	0	0	0	0	3	1	0	0	2	0
ENSMUSG00000106157	4930555A03Rik	0	0	0	0	0	0	0	0	0	0	0	0	0	0	0	0	0	0
ENSMUSG00000086396	4930555B11Rik	0	0	0	1	3	0	0	0	0	1	2	4	0	0	0	2	0	4
ENSMUSG00000085619	4930555B12Rik	0	0	0	0	0	0	0	0	0	0	0	0	0	0	0	0	0	0
ENSMUSG00000031559	4930555F03Rik	0	0	0	1	1	0	0	0	1	0	0	0	0	0	0	0	1	0
ENSMUSG00000096197	4930555G01Rik	0	0	0	0	0	0	0	0	0	0	0	0	0	0	0	0	0	0
ENSMUSG00000113329	4930555G21Rik	0	0	0	0	0	0	0	0	0	0	0	0	0	0	0	0	0	0
ENSMUSG00000093557	4930555M17Rik	0	0	0	0	0	0	0	0	0	0	0	0	0	0	0	0	0	0
ENSMUSG00000116586	4930556C24Rik	0	0	0	0	0	0	0	0	0	0	0	0	0	0	0	0	0	0
ENSMUSG00000115656	4930556J02Rik	0	0	0	0	1	2	1	1	2	0	1	1	1	1	1	1	3	2
ENSMUSG00000086800	4930556L07Rik	0	0	0	0	0	0	0	0	0	0	0	0	0	0	0	0	0	0
ENSMUSG00000096971	4930556M19Rik	51	58	57	38	52	27	40	30	43	43	28	32	113	54	45	45	25	36
ENSMUSG00000111924	4930556N09Rik	0	0	0	0	0	0	0	0	0	0	0	0	0	0	0	0	0	0
ENSMUSG00000092399	4930556N13Rik	1	2	0	0	1	0	0	1	0	0	0	1	2	1	1	0	0	0
ENSMUSG00000085488	4930557F10Rik	0	0	0	0	0	0	0	0	0	0	0	0	0	0	0	0	0	0
ENSMUSG00000106902	4930557J02Rik	0	0	0	0	0	0	0	0	0	0	0	0	0	0	0	0	0	0
ENSMUSG00000108034	4930557K07Rik	3	0	1	1	0	1	4	2	2	0	0	1	1	1	5	0	0	0
ENSMUSG00000105734	4930558C23Rik	0	0	0	0	0	0	0	0	0	0	0	0	0	0	0	0	0	0
ENSMUSG00000106506	4930558F17Rik	0	0	0	0	0	0	0	0	0	0	0	0	0	0	0	0	0	0
ENSMUSG00000086244	4930558G05Rik	0	0	0	0	0	0	0	0	0	0	0	0	0	0	0	0	0	0
ENSMUSG00000097519	4930558J18Rik	63	67	83	81	121	64	39	61	38	30	34	55	56	22	26	32	34	39
ENSMUSG00000086277	4930558K02Rik	0	0	0	0	0	0	0	0	0	0	0	0	2	0	0	0	0	0
ENSMUSG00000113164	4930559C10Rik	0	0	0	0	0	0	0	0	0	0	0	0	0	0	0	0	0	0
ENSMUSG00000022518	4930562C15Rik	10	8	18	4	5	3	13	13	7	5	4	8	20	11	12	0	7	6
ENSMUSG00000026729	4930562F07Rik	1	0	0	0	0	0	0	0	0	0	0	0	0	0	0	0	0	0
ENSMUSG00000104014	4930562F17Rik	0	0	0	0	0	0	0	0	0	0	0	0	0	0	0	0	0	0
ENSMUSG00000097387	4930563E18Rik	1	2	2	0	1	0	0	0	0	0	0	0	0	1	1	0	0	0
ENSMUSG00000053574	4930563E22Rik	12	7	25	20	20	14	11	19	9	7	9	7	28	15	14	8	10	12
ENSMUSG00000105773	4930563F08Rik	0	0	0	0	0	0	0	0	0	0	0	0	0	0	0	0	0	0
ENSMUSG00000107656	4930563H07Rik	0	0	0	0	0	0	0	2	0	0	1	0	0	0	0	0	0	0
ENSMUSG00000050702	4930563M21Rik	1	0	0	0	0	2	0	0	0	1	0	2	1	0	0	0	0	0
ENSMUSG00000051788	4930564D02Rik	0	0	0	0	0	0	0	1	0	0	0	0	0	1	0	0	0	0
ENSMUSG00000104004	4930565D16Rik	0	0	0	0	0	0	0	0	0	0	0	0	0	0	0	0	0	0
ENSMUSG00000084834	4930565N06Rik	15	13	21	29	24	14	12	8	3	13	3	8	18	3	11	15	8	6
ENSMUSG00000110629	4930567H12Rik	0	0	0	0	0	0	0	0	0	0	0	0	0	0	0	0	0	0
ENSMUSG00000073141	4930567H17Rik	0	0	0	0	0	0	0	0	0	0	0	0	0	0	0	0	0	0
ENSMUSG00000116982	4930567J20Rik	0	0	0	0	0	0	0	0	0	0	0	0	0	0	0	0	0	0
ENSMUSG00000109382	4930567K12Rik	0	0	0	0	0	0	0	0	0	0	0	0	0	0	0	0	0	0
ENSMUSG00000112730	4930567K20Rik	0	0	0	0	0	0	0	0	0	0	0	0	0	0	0	0	0	0
ENSMUSG00000026882	4930568D16Rik	0	0	0	0	0	0	0	0	0	0	0	0	0	0	0	0	0	0
ENSMUSG00000111830	4930568E12Rik	0	0	0	0	0	0	0	0	0	0	0	0	0	0	0	0	0	0
ENSMUSG00000102408	4930568G15Rik	0	0	0	0	0	0	0	0	0	0	0	0	0	0	0	0	0	0
ENSMUSG00000116786	4930570E03Rik	0	0	0	0	0	0	0	0	0	0	0	0	0	0	0	0	0	0
ENSMUSG00000085084	4930570G19Rik	0	0	0	0	0	0	0	0	0	0	0	1	0	0	0	0	0	0
ENSMUSG00000090457	4930571K23Rik	0	0	0	0	0	0	0	0	0	0	0	0	0	0	0	0	0	0
ENSMUSG00000105308	4930572K03Rik	0	0	0	0	0	0	0	0	0	0	0	0	0	0	0	0	0	0
ENSMUSG00000069720	4930572O03Rik	0	0	0	0	0	0	0	0	0	0	0	0	0	0	0	0	0	0
ENSMUSG00000114916	4930572O13Rik	0	0	0	0	0	0	0	0	0	0	0	0	0	0	0	0	0	0
ENSMUSG00000115935	4930573C08Rik	0	0	0	0	0	0	0	0	0	0	0	0	0	0	0	0	0	0
ENSMUSG00000104766	4930573H18Rik	1	0	0	1	1	1	0	0	0	0	0	1	2	0	1	0	0	0
ENSMUSG00000087440	4930577N17Rik	19	19	22	20	41	22	15	12	6	16	8	18	39	19	24	16	18	7
ENSMUSG00000117618	4930578E11Rik	0	0	0	0	0	0	0	0	1	0	0	0	0	0	0	0	0	0
ENSMUSG00000021961	4930578I06Rik	0	0	0	0	0	0	0	0	0	0	0	0	0	0	0	0	0	0
ENSMUSG00000097587	4930578M01Rik	2	1	6	4	1	4	1	4	2	0	4	4	6	5	2	1	0	3
ENSMUSG00000116695	4930578N18Rik	0	0	0	0	0	0	0	0	0	0	0	0	0	0	0	0	0	0
ENSMUSG00000084971	4930579D09Rik	0	0	0	0	0	0	0	0	0	0	0	0	0	0	0	0	0	0
ENSMUSG00000012042	4930579F01Rik	0	0	0	0	0	0	0	0	0	0	0	0	0	0	0	0	0	0
ENSMUSG00000027811	4930579G24Rik	797	829	905	766	1259	756	701	675	704	628	624	792	1385	808	737	951	915	883
ENSMUSG00000101636	4930579H20Rik	0	0	0	0	0	0	0	0	0	0	0	0	0	0	0	0	0	0
ENSMUSG00000114895	4930579J19Rik	0	0	0	0	0	0	0	0	0	0	0	0	0	0	0	0	0	0
ENSMUSG00000051074	4930579K19Rik	7	10	4	4	5	5	1	1	3	5	2	4	13	16	7	5	4	6
ENSMUSG00000112924	4930579P08Rik	0	0	0	0	0	0	0	0	0	1	0	0	0	0	0	0	0	0
ENSMUSG00000070315	4930581F22Rik	29	47	57	67	92	43	50	41	38	65	45	67	51	38	44	58	45	46
ENSMUSG00000024088	4930583I09Rik	0	0	0	0	0	0	0	0	0	0	0	0	0	0	0	0	0	0
ENSMUSG00000055159	4930583K01Rik	0	0	0	0	0	0	0	0	0	0	0	0	0	1	0	1	0	0
ENSMUSG00000086954	4930583P06Rik	0	0	0	0	0	0	0	0	0	0	0	0	0	0	0	0	0	0
ENSMUSG00000029044	4930584F24Rik	0	0	0	0	0	0	0	0	0	0	0	0	0	0	0	0	0	0
ENSMUSG00000087097	4930586N03Rik	0	0	0	0	0	0	0	0	0	0	0	0	0	0	0	0	0	0
ENSMUSG00000107563	4930587E11Rik	0	0	0	0	0	0	0	0	0	0	0	0	0	0	0	0	0	0
ENSMUSG00000068957	4930589L23Rik	88	84	103	38	72	33	38	59	38	48	62	68	142	86	75	42	57	63
ENSMUSG00000034063	4930590J08Rik	9	5	6	5	7	8	4	5	4	1	6	7	3	1	3	8	4	2
ENSMUSG00000102368	4930590L20Rik	0	0	0	0	0	0	0	0	0	0	0	0	0	0	0	0	0	0
ENSMUSG00000039138	4930591A17Rik	0	0	0	0	0	0	0	0	0	0	0	0	0	0	0	0	0	0
ENSMUSG00000111234	4930591E09Rik	0	0	0	0	0	0	0	0	0	0	0	0	0	0	0	0	0	0
ENSMUSG00000115779	4930592A05Rik	0	0	0	0	0	0	0	0	0	0	0	0	0	0	0	0	0	0
ENSMUSG00000105834	4930592C13Rik	0	5	2	1	8	1	0	1	2	1	2	6	5	4	9	4	2	4
ENSMUSG00000118339	4930592I03Rik	1	0	1	0	0	0	0	1	0	1	0	0	0	0	2	0	1	0
ENSMUSG00000097725	4930593A02Rik	0	0	0	0	0	0	0	0	0	0	0	0	0	0	0	0	0	0
ENSMUSG00000086365	4930593C16Rik	0	0	0	0	0	0	0	0	0	0	0	0	0	2	1	0	0	0
ENSMUSG00000103948	4930594C11Rik	3	2	3	2	2	5	5	2	0	1	3	4	4	0	1	3	2	2
ENSMUSG00000075463	4930594M22Rik	5	11	8	9	14	7	7	12	8	3	5	8	13	14	7	3	4	7
ENSMUSG00000085677	4930594O21Rik	2	3	0	0	0	0	0	0	0	0	2	0	1	0	0	0	1	0
ENSMUSG00000083193	4930595D18Rik	0	0	0	1	0	0	0	0	0	0	0	0	0	0	0	0	0	0
ENSMUSG00000060673	4930595M18Rik	0	0	0	0	0	0	0	0	0	0	0	0	0	0	0	0	0	0
ENSMUSG00000041068	4930596D02Rik	0	0	0	0	0	0	0	0	0	0	0	0	0	0	0	0	0	0
ENSMUSG00000104900	4930596I21Rik	0	0	0	0	1	0	0	0	0	0	0	0	0	0	0	0	0	0
ENSMUSG00000086501	4930597A21Rik	0	0	0	0	0	0	0	0	0	0	0	0	0	0	0	0	0	0
ENSMUSG00000115540	4930597G03Rik	0	0	0	0	0	0	0	0	0	0	0	0	0	0	0	0	0	0
ENSMUSG00000100777	4930598F16Rik	0	0	0	0	0	0	0	0	0	0	0	0	0	0	0	0	0	0
ENSMUSG00000109160	4930598N05Rik	0	0	0	0	0	0	0	0	0	0	0	0	0	0	0	0	0	0
ENSMUSG00000073144	4930599N23Rik	3	1	0	2	3	0	3	2	2	8	1	1	2	2	1	2	8	1
ENSMUSG00000031194	4931400O07Rik	0	0	0	0	0	0	0	0	0	0	0	0	0	0	0	0	0	0
ENSMUSG00000093772	4931403E22Rik	6	0	3	1	1	0	0	0	0	1	0	2	3	2	0	1	0	1
ENSMUSG00000089887	4931403M11Rik	0	0	0	0	0	0	0	0	1	0	0	0	0	0	0	0	0	0
ENSMUSG00000013353	4931406B18Rik	0	0	1	0	2	0	1	0	1	1	1	0	2	1	0	1	0	0
ENSMUSG00000031938	4931406C07Rik	641	612	668	838	1284	764	453	472	507	546	513	555	1034	636	565	576	674	545
ENSMUSG00000066571	4931406P16Rik	1659	1630	1815	1439	2267	1338	968	1029	893	864	849	1093	2412	1278	1371	1329	1304	1129
ENSMUSG00000073722	4931408C20Rik	5	2	3	0	0	0	0	0	0	0	0	0	2	2	0	0	0	0
ENSMUSG00000022179	4931414P19Rik	251	218	310	317	475	313	117	145	182	149	135	157	342	237	178	187	217	215
ENSMUSG00000054910	4931415C17Rik	13	7	10	9	11	6	3	3	5	5	3	3	11	9	12	6	3	5
ENSMUSG00000056197	4931417E11Rik	0	0	0	0	0	0	0	0	0	0	0	0	0	0	0	0	0	0
ENSMUSG00000106589	4931419H13Rik	0	0	0	0	0	0	0	0	0	0	0	0	0	0	0	0	0	0
ENSMUSG00000116750	4931420L22Rik	0	0	0	0	0	0	0	0	0	0	0	0	0	0	0	0	0	0
ENSMUSG00000046085	4931422A03Rik	3	0	6	4	3	2	5	3	2	2	6	1	6	2	5	3	2	2
ENSMUSG00000014837	4931428F04Rik	367	370	394	432	523	372	180	169	202	293	262	348	317	185	175	234	244	190
ENSMUSG00000086727	4931428L18Rik	0	2	1	1	0	0	0	1	0	0	0	0	1	1	0	0	0	0
ENSMUSG00000056617	4931429L15Rik	0	0	0	0	0	1	0	0	0	0	0	0	0	0	0	0	0	0
ENSMUSG00000047324	4931429P17Rik	0	0	0	0	0	0	0	0	0	0	0	0	0	0	0	0	0	0
ENSMUSG00000108354	4931431B13Rik	1	0	1	1	1	2	0	0	0	1	1	0	0	0	0	0	0	0
ENSMUSG00000055061	4931431C16Rik	1	0	2	3	1	2	0	0	2	0	0	0	0	5	0	0	0	0
ENSMUSG00000117661	4931439C15Rik	0	0	0	0	0	0	0	0	0	0	0	0	0	0	0	0	0	0
ENSMUSG00000078157	4931440F15Rik	3	3	0	3	3	1	0	2	1	1	0	4	3	5	0	0	0	1
ENSMUSG00000074580	4931440P22Rik	115	93	92	114	155	91	69	79	80	92	65	92	126	78	85	86	77	77
ENSMUSG00000058670	4932411N23Rik	0	0	0	0	0	0	0	0	0	1	1	0	0	1	0	0	0	0
ENSMUSG00000075070	4932412D23Rik	1	0	1	0	0	0	0	0	0	0	0	0	1	0	0	0	0	0
ENSMUSG00000099616	4932413F04Rik	0	0	0	0	0	0	0	0	0	0	0	0	0	0	0	0	0	0
ENSMUSG00000078962	4932414J04Rik	0	0	0	0	0	0	0	0	0	0	0	0	0	0	0	0	0	0
ENSMUSG00000079324	4932414N04Rik	0	0	0	0	0	0	0	0	1	0	0	0	0	0	0	0	0	0
ENSMUSG00000062036	4932415M13Rik	0	0	0	0	0	0	0	0	0	0	0	0	0	0	0	0	0	0
ENSMUSG00000079513	4932429P05Rik	0	0	0	0	0	0	0	0	0	0	0	0	0	0	0	0	0	0
ENSMUSG00000104442	4932431L22Rik	0	0	0	0	0	0	0	0	0	0	0	0	0	0	0	0	0	0
ENSMUSG00000074224	4932431P20Rik	2	0	0	0	0	0	0	0	0	0	0	0	0	0	0	0	0	1
ENSMUSG00000062391	4932435O22Rik	0	1	0	0	0	0	0	0	0	0	0	0	0	0	0	0	0	0
ENSMUSG00000037270	4932438A13Rik	1138	1029	1130	1012	1639	1012	722	828	612	639	647	896	1254	646	739	997	1028	784
ENSMUSG00000039851	4932438H23Rik	0	0	1	1	3	0	2	2	0	0	0	0	0	0	1	0	0	0
ENSMUSG00000097216	4932441J04Rik	14	9	9	45	64	29	21	25	16	49	25	65	5	13	17	16	22	19
ENSMUSG00000086796	4932702P03Rik	5	3	1	7	3	3	2	3	0	0	2	3	12	4	2	4	3	1
ENSMUSG00000055357	4933400A11Rik	0	0	0	0	0	0	0	0	0	0	0	0	0	0	0	0	0	0
ENSMUSG00000117364	4933400B14Rik	0	0	0	0	0	0	0	0	0	0	0	0	0	0	0	0	0	0
ENSMUSG00000101734	4933400C23Rik	0	0	0	0	0	0	0	0	0	0	0	0	0	0	0	0	0	0
ENSMUSG00000110336	4933400L20Rik	0	0	0	0	0	0	0	0	0	0	0	0	0	0	0	0	0	0
ENSMUSG00000055700	4933401B06Rik	0	0	0	0	0	0	0	0	0	0	0	0	0	0	0	0	0	0
ENSMUSG00000116924	4933401D09Rik	6	0	6	4	2	3	2	4	2	0	2	3	5	2	4	11	0	0
ENSMUSG00000106306	4933401H06Rik	0	0	0	0	0	0	0	0	0	0	0	0	0	0	0	0	0	0
ENSMUSG00000102004	4933402C06Rik	0	0	0	0	0	0	0	0	0	0	0	0	0	0	0	0	0	0
ENSMUSG00000025961	4933402D24Rik	7	11	8	8	12	5	20	9	12	11	9	8	12	7	11	14	6	5
ENSMUSG00000045330	4933402E13Rik	0	0	0	0	0	0	0	0	0	0	0	0	0	0	0	0	0	0
ENSMUSG00000069971	4933402J07Rik	0	0	0	0	0	0	0	0	0	0	0	0	0	0	0	0	0	0
ENSMUSG00000106013	4933402J10Rik	0	0	0	0	0	0	0	0	0	0	0	0	0	0	0	0	0	0
ENSMUSG00000115845	4933402J15Rik	0	0	0	0	0	0	0	0	0	0	0	0	0	0	0	0	1	0
ENSMUSG00000013668	4933402N03Rik	0	0	0	0	0	0	0	0	0	0	0	0	0	0	0	0	0	0
ENSMUSG00000067848	4933402N22Rik	0	0	0	0	0	0	0	0	0	0	0	0	0	0	0	0	0	0
ENSMUSG00000079460	4933403O08Rik	0	0	0	0	0	0	0	0	0	0	0	0	0	0	0	0	0	0
ENSMUSG00000116096	4933404G15Rik	0	0	0	0	0	0	0	0	0	0	0	0	0	0	0	0	0	0
ENSMUSG00000085122	4933404K08Rik	0	0	0	0	0	0	0	0	0	0	0	0	0	0	0	0	0	0
ENSMUSG00000111342	4933404K13Rik	0	0	0	0	0	0	0	0	0	0	0	0	0	0	0	0	0	0
ENSMUSG00000097908	4933404O12Rik	544	438	572	510	735	458	465	531	540	349	360	438	732	456	440	364	356	363
ENSMUSG00000097852	4933405D12Rik	7	3	3	3	3	2	1	2	1	2	0	1	1	5	2	1	2	0
ENSMUSG00000086209	4933405E24Rik	0	0	0	0	0	0	0	0	1	0	0	0	0	0	0	0	0	0
ENSMUSG00000013158	4933405L10Rik	9	2	2	1	0	4	1	6	5	4	1	2	5	4	4	4	3	4
ENSMUSG00000084234	4933405O20Rik	0	0	0	0	0	0	0	0	0	0	0	0	0	0	0	0	0	0
ENSMUSG00000110427	4933406B17Rik	0	2	1	0	1	0	0	0	2	0	0	0	1	0	0	5	0	0
ENSMUSG00000097494	4933406C10Rik	3	2	3	0	4	3	1	5	2	3	3	8	5	3	6	3	2	1
ENSMUSG00000085796	4933406D12Rik	0	0	0	0	0	0	0	0	0	0	0	0	0	0	0	0	0	0
ENSMUSG00000090585	4933406F09Rik	0	0	0	0	0	0	0	0	0	0	0	0	0	0	0	0	0	0
ENSMUSG00000086025	4933406G16Rik	0	0	0	0	0	0	0	0	0	0	0	0	0	0	0	0	0	0
ENSMUSG00000087475	4933406I18Rik	0	0	0	0	0	0	0	0	0	0	0	0	0	0	1	0	0	0
ENSMUSG00000107666	4933406J09Rik	0	0	1	2	7	0	0	0	0	1	1	0	0	0	0	0	0	0
ENSMUSG00000086690	4933406J10Rik	0	0	0	0	0	0	0	0	0	0	0	0	0	0	0	0	0	0
ENSMUSG00000085820	4933406K04Rik	0	0	0	0	0	0	0	0	0	0	0	0	0	0	0	0	0	0
ENSMUSG00000111836	4933407I05Rik	0	0	0	0	0	0	0	0	0	0	0	0	0	0	0	0	0	0
ENSMUSG00000087396	4933407K13Rik	118	94	116	104	146	131	78	82	82	63	65	71	133	93	85	83	92	88
ENSMUSG00000026224	4933407L21Rik	0	0	1	0	1	0	0	0	2	0	0	1	2	0	0	0	2	2
ENSMUSG00000097407	4933408J17Rik	2	4	0	1	3	5	1	6	3	0	2	1	0	0	4	1	1	3
ENSMUSG00000084848	4933408N05Rik	0	0	0	0	0	0	0	0	0	0	0	0	0	0	0	0	0	0
ENSMUSG00000113218	4933409F18Rik	0	0	0	0	0	0	0	0	0	0	0	0	0	0	0	0	0	0
ENSMUSG00000053896	4933409G03Rik	0	0	0	0	0	0	0	0	0	0	0	0	0	0	0	0	0	0
ENSMUSG00000112500	4933411E08Rik	0	0	0	0	0	0	0	0	1	0	0	0	0	0	0	0	0	0
ENSMUSG00000062224	4933411G06Rik	0	0	0	0	0	0	0	0	0	0	0	0	0	0	0	0	0	0
ENSMUSG00000090369	4933411K16Rik	4	0	7	4	6	0	4	1	7	6	5	4	11	3	5	1	1	0
ENSMUSG00000112627	4933412E12Rik	196	189	210	349	537	324	155	178	178	573	451	527	265	203	162	462	517	464
ENSMUSG00000071749	4933412E24Rik	0	0	0	0	0	0	0	0	0	0	0	0	0	0	0	0	0	0
ENSMUSG00000113960	4933412O06Rik	0	0	0	0	0	0	0	0	0	0	0	0	0	0	0	0	0	1
ENSMUSG00000021874	4933413J09Rik	3	5	2	5	3	1	1	4	1	0	0	0	3	3	2	5	0	3
ENSMUSG00000079048	4933413L06Rik	0	0	0	0	0	0	0	0	0	0	0	0	0	0	0	0	0	0
ENSMUSG00000072983	4933414I15Rik	0	0	0	0	0	0	0	0	0	0	0	0	0	0	0	0	0	0
ENSMUSG00000085198	4933416E03Rik	0	0	0	0	0	0	0	0	0	0	0	0	0	0	0	0	0	0
ENSMUSG00000086996	4933416E14Rik	0	0	0	0	0	0	0	0	0	0	0	0	0	0	0	0	0	0
ENSMUSG00000079593	4933416I08Rik	0	0	0	0	0	0	0	0	0	0	0	0	0	0	0	0	0	1
ENSMUSG00000100733	4933416M06Rik	0	0	0	0	0	0	0	0	0	0	0	0	0	0	0	0	0	0
ENSMUSG00000113802	4933416O17Rik	0	0	0	0	0	0	0	0	0	0	0	0	0	0	0	0	0	0
ENSMUSG00000021415	4933417A18Rik	0	0	0	0	0	0	0	0	0	0	0	0	0	0	0	0	0	0
ENSMUSG00000097637	4933417D19Rik	5	0	2	2	6	0	2	0	3	2	2	0	5	1	0	0	5	0
ENSMUSG00000101848	4933417E11Rik	0	0	1	0	0	0	0	0	0	0	0	0	0	0	0	0	0	0
ENSMUSG00000106572	4933417G07Rik	0	0	0	0	0	0	0	0	0	0	0	0	0	0	0	0	0	0
ENSMUSG00000101360	4933417O13Rik	1	0	0	0	0	0	0	0	0	0	0	0	1	1	1	0	1	0
ENSMUSG00000030463	4933421I07Rik	0	0	0	0	0	0	0	0	0	0	0	0	0	0	0	0	1	0
ENSMUSG00000085037	4933421O10Rik	68	63	73	61	92	71	43	45	29	36	30	34	116	66	62	30	46	34
ENSMUSG00000111746	4933422A05Rik	0	2	1	2	5	2	3	2	1	3	0	0	2	3	1	4	0	0
ENSMUSG00000117450	4933424G05Rik	0	0	0	0	1	0	0	0	1	1	1	0	0	0	0	0	1	1
ENSMUSG00000102416	4933424G06Rik	1	0	2	3	0	1	0	1	2	1	3	2	0	2	1	4	1	1
ENSMUSG00000085719	4933424L21Rik	0	0	0	0	0	0	0	0	0	0	0	0	1	0	0	0	0	0
ENSMUSG00000087289	4933424M12Rik	0	0	1	0	0	0	0	0	0	0	0	0	0	0	0	0	0	0
ENSMUSG00000115665	4933425B07Rik	0	0	0	0	0	0	0	0	0	0	0	0	0	0	0	0	0	0
ENSMUSG00000055403	4933427D06Rik	2	3	3	4	3	5	0	0	0	0	0	0	0	0	0	0	0	1
ENSMUSG00000020807	4933427D14Rik	414	517	543	538	832	515	497	518	550	479	427	466	674	485	397	469	434	435
ENSMUSG00000107877	4933427D14Rik	113	20	17	12	18	20	7	7	8	8	3	12	113	3	15	47	12	10
ENSMUSG00000044276	4933427E11Rik	0	0	0	0	0	0	0	0	0	0	0	0	0	0	0	0	0	0
ENSMUSG00000033015	4933427E13Rik	0	0	0	0	0	0	0	0	0	0	0	0	0	0	0	0	0	0
ENSMUSG00000085928	4933427I22Rik	0	0	0	0	0	0	0	0	0	0	0	0	0	0	0	0	0	0
ENSMUSG00000086355	4933428C19Rik	0	0	0	0	0	0	0	0	0	0	0	0	0	0	0	0	0	0
ENSMUSG00000047988	4933428G20Rik	0	3	1	4	3	0	1	1	5	0	3	0	0	0	2	0	5	2
ENSMUSG00000042525	4933428M09Rik	0	0	0	0	0	2	0	0	0	0	0	0	0	0	0	0	0	0
ENSMUSG00000115008	4933429O19Rik	0	0	0	0	0	0	0	0	0	0	0	0	0	0	0	0	0	0
ENSMUSG00000109106	4933430H16Rik	0	0	0	0	0	0	0	0	0	0	0	0	0	0	0	2	0	0
ENSMUSG00000058046	4933430I17Rik	15	19	14	14	18	22	7	18	4	14	12	12	22	17	8	23	20	15
ENSMUSG00000086892	4933430M04Rik	0	0	0	0	0	0	0	0	0	0	0	0	0	0	0	0	0	0
ENSMUSG00000108848	4933430N04Rik	0	0	0	0	0	0	0	0	0	0	0	0	0	0	0	0	0	0
ENSMUSG00000086968	4933431E20Rik	419	388	407	343	474	279	246	256	282	347	271	352	510	378	305	196	194	186
ENSMUSG00000108709	4933431G14Rik	6	3	1	4	3	5	2	1	1	6	5	3	4	3	1	8	1	0
ENSMUSG00000111843	4933432G23Rik	0	0	0	0	0	0	0	0	0	0	0	0	0	0	0	0	0	0
ENSMUSG00000114980	4933432I03Rik	14	14	15	24	33	14	16	11	18	36	25	42	17	12	9	37	28	24
ENSMUSG00000116557	4933432I09Rik	2	1	0	0	0	0	0	2	0	0	0	0	0	0	0	0	0	0
ENSMUSG00000097044	4933433F19Rik	0	0	0	0	0	0	0	0	0	0	0	0	0	0	0	0	0	0
ENSMUSG00000111807	4933433G08Rik	0	0	0	0	0	0	0	0	0	0	0	0	0	0	0	0	0	0
ENSMUSG00000097021	4933433G15Rik	0	2	1	4	4	1	1	0	0	1	0	3	1	1	7	2	2	5
ENSMUSG00000114362	4933433G19Rik	15	17	17	11	20	7	13	16	13	10	7	14	20	4	7	13	15	12
ENSMUSG00000117571	4933433H22Rik	0	0	0	5	13	6	0	0	0	10	5	7	0	0	0	10	5	5
ENSMUSG00000103844	4933436E23Rik	0	0	0	0	0	0	0	0	0	0	0	0	0	0	0	0	0	0
ENSMUSG00000108924	4933436H12Rik	0	0	0	0	0	0	0	0	0	0	0	0	0	0	0	0	0	0
ENSMUSG00000025288	4933436I01Rik	0	0	0	0	0	0	0	0	0	0	0	0	0	0	0	0	0	0
ENSMUSG00000105490	4933438B17Rik	0	0	0	0	0	0	0	0	0	0	0	0	0	0	0	0	0	0
ENSMUSG00000093617	4933438K21Rik	0	0	0	0	1	0	1	0	0	0	0	0	0	0	0	0	0	0
ENSMUSG00000072893	4933439C10Rik	137	133	150	158	238	138	100	114	116	135	119	133	246	181	161	141	111	152
ENSMUSG00000085184	4933439K11Rik	35	32	30	60	109	68	23	30	38	95	98	138	30	14	19	25	29	30
ENSMUSG00000097082	4933440J02Rik	0	0	0	0	2	0	0	0	0	0	0	0	0	0	0	0	1	0
ENSMUSG00000045928	4933440M02Rik	0	0	0	0	0	0	0	0	0	0	0	0	0	0	0	0	0	0
ENSMUSG00000051940	5031410I06Rik	0	0	0	0	0	0	0	0	0	0	0	0	0	0	0	0	0	0
ENSMUSG00000073147	5031425E22Rik	143	140	133	119	174	80	125	148	110	104	83	113	301	229	188	133	150	124
ENSMUSG00000036046	5031439G07Rik	5871	5325	5940	7363	10818	6481	6773	7619	7918	7882	7252	8944	9376	5814	5210	6178	6409	5840
ENSMUSG00000096932	5033403F01Rik	6	8	6	11	12	2	4	6	2	3	3	3	6	3	9	5	6	8
ENSMUSG00000106352	5033403H07Rik	1	1	2	3	2	0	1	2	1	0	1	0	3	2	1	2	2	0
ENSMUSG00000102185	5033404E19Rik	0	0	0	0	0	0	0	0	0	0	0	0	0	0	0	0	0	0
ENSMUSG00000113769	5033406O09Rik	69	75	92	102	139	89	76	83	101	137	126	160	205	146	100	92	124	117
ENSMUSG00000097251	5033417F24Rik	6	3	6	4	4	8	4	6	4	4	3	7	6	3	5	2	4	4
ENSMUSG00000097910	5033428I22Rik	0	0	0	1	0	0	0	1	0	0	0	1	0	0	0	0	0	0
ENSMUSG00000087455	5330411J11Rik	0	0	0	0	0	0	0	0	0	0	0	0	0	0	0	0	0	0
ENSMUSG00000086822	5330413P13Rik	0	0	0	0	0	0	0	0	0	0	0	0	0	0	0	0	0	0
ENSMUSG00000054944	5330416C01Rik	0	1	0	0	0	0	0	0	0	0	0	0	0	0	0	0	0	0
ENSMUSG00000040412	5330417C22Rik	0	1	0	0	0	0	4	3	0	1	3	4	2	0	1	4	2	0
ENSMUSG00000085896	5330429C05Rik	0	0	0	0	0	0	0	0	0	0	0	0	0	0	0	0	0	0
ENSMUSG00000087620	5330434G04Rik	0	0	0	0	0	0	0	0	0	0	0	0	0	0	0	0	0	0
ENSMUSG00000104234	5330439B14Rik	0	0	0	0	0	0	0	0	0	0	0	0	0	0	0	0	0	0
ENSMUSG00000094113	5430401F13Rik	0	0	0	0	0	0	0	0	0	0	0	0	0	0	0	0	0	0
ENSMUSG00000044121	5430402E10Rik	0	0	0	0	0	0	0	0	0	0	0	0	0	0	0	0	0	0
ENSMUSG00000085776	5430402O13Rik	5	3	6	3	6	3	6	6	10	8	7	6	11	8	5	1	5	4
ENSMUSG00000109761	5430403N17Rik	0	0	0	0	0	0	0	0	0	0	0	0	0	0	0	0	0	0
ENSMUSG00000085741	5430405H02Rik	141	86	128	186	206	61	70	88	114	113	91	73	217	188	84	96	97	94
ENSMUSG00000097772	5430416N02Rik	395	383	451	448	685	404	310	383	383	257	249	259	656	376	368	429	365	344
ENSMUSG00000110140	5430421F17Rik	0	0	0	0	0	0	0	0	0	1	1	0	1	2	1	1	0	0
ENSMUSG00000085004	5430427M07Rik	0	0	0	0	0	0	0	0	0	0	0	0	0	0	0	1	0	0
ENSMUSG00000025058	5430427O19Rik	233	192	241	283	449	252	233	260	262	220	279	278	520	304	209	483	490	420
ENSMUSG00000108322	5430431A17Rik	1	3	1	2	3	4	1	3	0	2	2	1	7	0	1	1	0	0
ENSMUSG00000106002	5430434I15Rik	0	0	0	0	0	0	0	0	0	0	0	0	0	0	0	0	0	0
ENSMUSG00000110018	5430437J10Rik	5	1	3	3	6	3	2	9	5	6	2	1	4	7	4	8	5	12
ENSMUSG00000115548	5430440P10Rik	0	0	0	0	0	0	0	0	1	0	0	0	0	0	0	0	0	0
ENSMUSG00000055594	5530400C23Rik	0	0	0	0	0	0	0	0	0	0	0	0	0	0	0	0	0	0
ENSMUSG00000020703	5530401A14Rik	1	2	1	1	1	0	2	3	1	1	1	1	2	1	3	0	1	0
ENSMUSG00000087174	5530601H04Rik	302	269	282	257	429	226	232	301	304	185	201	245	494	275	305	270	267	298
ENSMUSG00000099170	5730403I07Rik	0	0	0	0	0	0	0	0	0	0	0	0	0	0	0	0	0	0
ENSMUSG00000087424	5730405O15Rik	22	16	21	16	20	16	12	7	11	8	8	9	18	16	16	8	12	13
ENSMUSG00000073755	5730409E04Rik	549	479	580	476	711	390	535	555	634	356	386	436	1351	941	741	571	536	578
ENSMUSG00000087553	5730412P04Rik	0	0	0	0	0	0	0	0	0	0	0	0	0	0	0	0	0	0
ENSMUSG00000081793	5730416F02Rik	0	0	0	0	0	1	0	2	2	1	1	0	0	0	0	0	0	0
ENSMUSG00000097766	5730420D15Rik	0	0	0	1	0	0	0	0	0	0	0	0	0	0	0	0	0	0
ENSMUSG00000091370	5730435O14Rik	6	8	5	5	5	2	1	3	3	3	3	5	9	2	4	11	13	8
ENSMUSG00000057181	5730455P16Rik	648	662	711	626	1019	608	695	762	697	506	470	668	1041	668	602	529	572	525
ENSMUSG00000062046	5730460C07Rik	0	0	0	0	0	0	0	0	0	0	0	0	0	0	0	0	0	0
ENSMUSG00000103995	5730488B01Rik	0	0	0	0	0	0	0	0	0	0	0	0	0	0	0	0	0	0
ENSMUSG00000073197	5730507C01Rik	1	0	1	4	1	0	1	4	0	1	1	0	5	1	1	5	2	4
ENSMUSG00000056468	5730596B20Rik	0	0	3	3	2	5	0	1	1	0	0	3	5	0	1	4	1	1
ENSMUSG00000110148	5830408C22Rik	26	17	22	28	35	17	18	30	23	32	11	22	35	14	21	11	14	15
ENSMUSG00000054672	5830411N06Rik	0	0	0	1	0	1	0	0	0	0	0	0	0	0	0	0	0	0
ENSMUSG00000106219	5830416I19Rik	20	20	24	9	33	9	7	13	28	7	5	4	89	42	37	16	19	14
ENSMUSG00000086236	5830418P13Rik	1	1	2	0	1	1	1	3	1	0	0	0	4	0	2	1	0	4
ENSMUSG00000113035	5830428M24Rik	14	12	9	22	50	26	2	4	1	9	8	9	40	23	22	21	17	15
ENSMUSG00000097471	5830432E09Rik	55	41	37	36	45	20	34	35	43	68	61	73	67	29	34	43	46	29
ENSMUSG00000084803	5830444B04Rik	1	1	0	1	2	0	0	0	0	1	0	0	0	0	0	0	0	0
ENSMUSG00000052658	5830454E08Rik	8	11	11	10	12	14	2	3	6	8	4	4	15	16	9	9	4	10
ENSMUSG00000106951	5930430L01Rik	1	0	0	0	1	0	0	0	0	0	0	2	0	0	0	0	0	2
ENSMUSG00000114590	5930438M14Rik	0	0	0	0	0	0	0	0	1	0	0	0	1	0	0	0	0	2
ENSMUSG00000100301	6030407O03Rik	0	0	0	0	0	0	0	0	0	0	0	0	0	0	0	0	0	0
ENSMUSG00000113056	6030440G07Rik	2	0	0	0	1	0	1	2	1	0	0	0	0	0	1	2	0	0
ENSMUSG00000100664	6030442E23Rik	0	0	0	0	0	0	0	0	0	0	0	0	0	0	0	0	0	0
ENSMUSG00000097207	6030443J06Rik	17	15	15	20	32	23	17	13	25	22	6	29	27	12	15	18	31	21
ENSMUSG00000022195	6030458C11Rik	1353	1282	1405	1306	1960	1192	1305	1467	1507	1304	1227	1485	2166	1288	1347	1420	1409	1221
ENSMUSG00000110599	6030466F02Rik	0	0	0	0	0	0	0	0	0	0	0	0	0	0	0	0	0	0
ENSMUSG00000025573	6030468B19Rik	0	0	0	0	0	0	0	1	0	1	0	0	3	0	1	0	1	0
ENSMUSG00000095953	6030469F06Rik	0	0	0	0	0	0	0	0	0	0	0	0	0	0	0	0	0	0
ENSMUSG00000085217	6030471H07Rik	0	0	0	0	0	0	0	0	0	0	0	0	0	0	0	0	0	0
ENSMUSG00000051361	6030498E09Rik	0	0	0	0	0	0	0	0	0	0	0	0	0	0	0	0	0	0
ENSMUSG00000097577	6230400D17Rik	46	48	52	59	54	46	48	58	53	34	35	46	79	40	33	44	41	39
ENSMUSG00000018451	6330403K07Rik	1	4	10	4	13	9	5	2	2	1	3	7	7	4	5	5	7	7
ENSMUSG00000009551	6330409D20Rik	7	4	11	3	8	6	8	6	10	14	5	9	18	3	8	4	9	1
ENSMUSG00000105960	6330410L21Rik	0	1	2	0	0	0	0	0	0	0	0	0	0	0	0	0	0	0
ENSMUSG00000108077	6330415B21Rik	0	0	0	0	0	0	0	0	0	0	0	0	0	0	0	0	0	0
ENSMUSG00000117322	6330415G19Rik	21	12	25	17	30	9	22	18	17	22	13	15	32	24	16	11	12	19
ENSMUSG00000085227	6330418K02Rik	93	100	112	82	142	73	82	111	95	84	62	64	157	108	97	67	88	97
ENSMUSG00000109898	6330420H09Rik	0	0	0	0	0	0	0	0	0	0	0	0	0	0	0	0	0	0
ENSMUSG00000045327	6330549D23Rik	84	72	96	77	129	71	49	60	54	37	32	33	80	66	71	61	31	55
ENSMUSG00000053545	6430503K07Rik	0	0	0	0	0	0	0	1	2	0	0	0	0	0	0	0	0	0
ENSMUSG00000031824	6430548M08Rik	391	389	411	319	521	278	314	382	363	589	564	633	455	276	278	221	217	249
ENSMUSG00000074646	6430550D23Rik	24	24	34	20	30	20	28	21	22	24	19	30	45	30	30	20	17	21
ENSMUSG00000116755	6430553K19Rik	0	2	0	5	4	3	0	0	0	0	0	0	0	1	3	0	5	2
ENSMUSG00000037977	6430571L13Rik	12	10	12	11	21	14	9	8	14	5	12	15	5	11	6	6	7	7
ENSMUSG00000108228	6430584L05Rik	0	0	0	0	0	0	0	0	0	0	0	0	0	0	0	0	0	0
ENSMUSG00000034185	6430628N08Rik	0	0	0	0	0	0	0	0	0	0	0	0	0	0	0	0	0	0
ENSMUSG00000085427	6430710C18Rik	0	0	0	0	0	1	0	0	0	0	0	1	0	0	0	1	0	0
ENSMUSG00000079499	6530402F18Rik	64	67	56	261	382	245	14	18	16	68	41	70	67	50	46	103	101	81
ENSMUSG00000097049	6530411M01Rik	0	0	0	0	0	0	0	0	0	0	0	0	0	0	0	0	0	0
ENSMUSG00000111511	6720432D03Rik	0	0	0	0	0	0	0	0	0	0	0	0	0	0	0	0	0	0
ENSMUSG00000117655	6720468P15Rik	3	1	3	2	10	1	1	1	2	2	3	0	3	8	3	1	2	3
ENSMUSG00000097934	6720483E21Rik	1	0	0	0	1	2	2	0	0	0	0	0	0	0	0	2	0	1
ENSMUSG00000072066	6720489N17Rik	9	6	20	14	20	13	1	8	11	3	10	8	17	11	5	4	1	10
ENSMUSG00000032680	6820408C15Rik	0	0	2	1	1	1	0	0	0	1	1	0	1	2	0	1	0	1
ENSMUSG00000108020	6820426E19Rik	0	0	0	0	0	0	0	0	0	0	0	0	0	0	0	0	0	0
ENSMUSG00000071796	6820431F20Rik	4232	4122	4605	4640	7850	4579	3228	3753	3648	2834	2645	3282	6176	3476	3529	3905	3514	3319
ENSMUSG00000074123	7420426K07Rik	0	0	0	0	0	0	0	0	0	0	0	0	0	0	0	0	0	0
ENSMUSG00000109915	7420700N18Rik	0	0	0	0	0	0	0	0	0	0	0	0	0	0	0	0	0	0
ENSMUSG00000113620	7420701I03Rik	0	0	0	0	0	0	0	0	0	0	0	0	0	0	0	0	0	0
ENSMUSG00000096607	7530416G11Rik	0	0	0	0	0	0	0	0	0	0	0	0	0	0	0	0	0	0
ENSMUSG00000098758	7630403G23Rik	0	0	0	0	0	0	0	0	0	0	0	0	0	0	0	0	0	0
ENSMUSG00000052295	8030423F21Rik	0	0	3	0	3	0	0	1	0	0	0	1	0	0	0	0	0	0
ENSMUSG00000021600	8030423J24Rik	0	0	0	0	0	0	0	0	0	0	0	0	0	0	0	0	0	0
ENSMUSG00000102674	8030442B05Rik	0	0	0	0	0	0	0	1	0	0	0	1	0	0	1	0	0	0
ENSMUSG00000086483	8030443G20Rik	0	0	0	0	0	0	0	0	0	0	0	0	0	0	0	0	0	0
ENSMUSG00000116769	8030451O07Rik	0	0	0	0	0	0	0	0	0	0	0	0	0	0	0	0	0	0
ENSMUSG00000110507	8030455M16Rik	0	0	0	0	0	0	0	0	0	0	0	0	0	0	0	0	0	0
ENSMUSG00000047466	8030462N17Rik	1214	1135	1209	1170	1944	1213	1111	1306	1172	1136	994	1266	1876	1094	1053	1339	1248	1114
ENSMUSG00000046774	8030474K03Rik	0	0	0	0	0	0	0	0	0	0	0	0	0	0	0	0	0	0
ENSMUSG00000117633	8430422H06Rik	0	0	0	0	0	0	0	0	0	0	0	0	0	0	0	0	0	0
ENSMUSG00000079069	8430423G03Rik	0	0	0	0	0	0	0	0	0	0	0	0	0	0	0	0	0	0
ENSMUSG00000115970	8430426J06Rik	4	1	2	0	0	0	0	4	1	1	0	1	5	2	1	3	3	2
ENSMUSG00000034587	8430429K09Rik	128	127	135	128	228	138	95	105	115	93	80	115	198	148	114	101	90	108
ENSMUSG00000117431	8430430B14Rik	0	0	0	0	0	0	0	0	0	0	0	0	0	0	0	0	0	0
ENSMUSG00000086070	8430436N08Rik	0	0	0	0	0	0	0	0	0	0	0	0	0	0	0	0	0	0
ENSMUSG00000085252	8430437L04Rik	0	0	0	0	0	0	0	0	0	0	0	0	0	0	0	0	0	0
ENSMUSG00000116953	9030025P20Rik	281	231	228	277	366	264	182	193	258	191	169	188	493	272	278	255	226	215
ENSMUSG00000086449	9030204H09Rik	0	0	0	0	0	0	0	0	1	0	0	0	0	0	0	0	0	0
ENSMUSG00000116660	9030404E10Rik	0	0	0	0	0	0	0	0	0	0	0	0	0	0	0	0	0	0
ENSMUSG00000045008	9030612E09Rik	0	2	0	1	0	0	1	0	0	0	0	0	0	0	0	0	0	0
ENSMUSG00000097691	9030616G12Rik	0	0	0	0	1	0	0	0	1	0	0	0	1	2	1	3	0	1
ENSMUSG00000053168	9030619P08Rik	0	0	3	0	0	1	0	0	0	0	2	0	0	2	1	0	0	3
ENSMUSG00000073158	9030624G23Rik	20	19	21	27	31	15	20	12	23	14	26	14	24	14	14	20	15	17
ENSMUSG00000118384	9030625G05Rik	0	0	0	0	0	0	0	0	0	0	0	0	0	1	0	0	0	0
ENSMUSG00000054951	9130008F23Rik	96	81	102	49	90	45	96	118	117	90	65	81	221	174	101	75	89	87
ENSMUSG00000113985	9130015A21Rik	0	0	0	0	0	0	0	0	1	0	0	1	1	0	0	0	0	0
ENSMUSG00000086653	9130015L21Rik	0	0	0	0	0	0	0	0	0	0	0	0	0	0	0	0	0	0
ENSMUSG00000030823	9130019O22Rik	282	262	315	233	306	197	213	283	220	194	184	217	505	306	242	286	268	285
ENSMUSG00000073067	9130019P16Rik	2	0	1	0	1	0	0	1	1	0	1	0	1	0	0	1	0	2
ENSMUSG00000062944	9130023H24Rik	190	172	161	209	385	221	114	126	135	222	170	186	299	198	173	190	204	176
ENSMUSG00000087022	9130024F11Rik	29	16	24	31	52	18	9	31	10	22	19	18	18	13	18	16	14	21
ENSMUSG00000117602	9130209A04Rik	0	0	0	0	0	0	0	0	0	0	0	0	0	0	0	0	0	0
ENSMUSG00000097386	9130213A22Rik	1	0	1	0	0	1	0	0	0	0	0	2	1	0	0	1	1	0
ENSMUSG00000108356	9130221F21Rik	0	4	1	1	2	1	0	1	0	3	0	0	4	1	0	0	0	0
ENSMUSG00000090330	9130221H12Rik	194	191	250	210	332	203	169	146	214	160	142	188	313	246	197	178	131	159
ENSMUSG00000099950	9130227L01Rik	0	0	0	0	0	0	0	0	0	0	0	0	0	0	0	0	1	0
ENSMUSG00000054598	9130230L23Rik	3	7	8	11	9	5	8	7	13	34	25	24	14	6	3	3	2	7
ENSMUSG00000101892	9130401M01Rik	1020	1038	1150	1226	2032	1159	1012	1156	1344	921	838	1009	1661	1161	942	1128	1290	1257
ENSMUSG00000038768	9130409I23Rik	1	2	1	2	0	2	0	1	1	1	2	1	2	1	0	0	0	2
ENSMUSG00000072982	9230009I02Rik	0	0	0	0	0	0	0	0	0	0	0	0	0	0	0	0	0	0
ENSMUSG00000072753	9230020A06Rik	0	0	0	0	0	0	0	0	0	0	0	0	0	0	0	0	0	0
ENSMUSG00000112398	9230102K24Rik	0	0	0	0	0	0	0	0	1	0	0	0	0	0	0	0	0	0
ENSMUSG00000079602	9230102O04Rik	21	18	26	21	29	18	17	19	13	24	35	34	19	21	9	25	26	12
ENSMUSG00000090191	9230105E05Rik	0	1	0	0	2	0	2	2	0	4	0	0	0	0	1	0	0	0
ENSMUSG00000021797	9230112D13Rik	2	1	1	2	2	2	0	0	0	1	1	0	11	7	1	2	3	6
ENSMUSG00000111761	9230112J17Rik	0	0	0	1	0	0	0	0	0	0	0	0	0	0	0	0	0	0
ENSMUSG00000097145	9230114K14Rik	45	66	52	54	79	60	93	117	96	67	66	98	129	55	61	63	103	66
ENSMUSG00000112489	9230116L04Rik	9	3	7	5	4	6	6	11	2	8	5	13	16	4	8	5	11	4
ENSMUSG00000097403	9230116N13Rik	29	31	41	41	64	29	15	16	26	14	13	17	32	38	20	23	20	32
ENSMUSG00000089874	9230117E06Rik	0	0	2	0	0	2	0	0	0	0	0	0	0	0	0	0	0	0
ENSMUSG00000107879	9330102E08Rik	0	0	0	0	1	3	0	0	0	0	0	0	2	1	0	0	0	0
ENSMUSG00000097842	9330104G04Rik	22	21	30	20	35	18	3	10	3	20	15	20	30	25	17	2	14	10
ENSMUSG00000097098	9330111N05Rik	0	1	0	1	0	0	0	0	0	0	0	0	2	0	2	0	3	0
ENSMUSG00000118154	9330117O12Rik	0	0	0	0	0	0	0	0	0	0	0	0	0	0	0	0	0	0
ENSMUSG00000097781	9330136K24Rik	22	9	10	13	17	7	9	18	16	19	17	15	19	17	12	12	10	15
ENSMUSG00000097061	9330151L19Rik	159	153	186	172	250	140	120	144	138	162	124	152	210	146	159	138	140	148
ENSMUSG00000073154	9330158H04Rik	0	0	0	0	0	0	0	1	0	0	0	0	0	0	0	0	0	0
ENSMUSG00000004360	9330159F19Rik	0	0	0	0	0	0	0	0	0	0	1	0	0	0	0	0	0	0
ENSMUSG00000097177	9330159M07Rik	76	68	70	65	105	67	73	92	86	55	48	78	81	55	71	71	49	48
ENSMUSG00000103577	9330162B11Rik	0	0	0	0	0	0	0	0	0	0	0	0	0	0	0	0	0	0
ENSMUSG00000101799	9330175M20Rik	0	0	0	0	0	0	0	0	0	0	0	0	0	0	0	0	0	0
ENSMUSG00000104553	9330178D15Rik	0	0	0	0	0	0	0	0	0	0	0	0	0	0	0	0	0	0
ENSMUSG00000097166	9330179D12Rik	7	4	5	14	17	10	17	10	16	9	10	10	10	2	5	10	8	10
ENSMUSG00000056004	9330182L06Rik	265	224	281	215	325	174	361	447	416	396	345	483	540	307	298	345	378	327
ENSMUSG00000094112	9330182O14Rik	2	4	0	1	2	1	0	2	0	0	2	6	0	1	1	3	1	3
ENSMUSG00000115149	9330188P03Rik	3	1	4	5	8	2	0	0	0	2	0	0	0	1	3	1	0	2
ENSMUSG00000114189	9330199G10Rik	0	0	0	0	0	0	0	0	0	0	0	0	0	0	0	0	0	0
ENSMUSG00000116360	9430014N10Rik	0	0	0	0	0	0	0	0	0	0	0	0	0	0	0	0	0	0
ENSMUSG00000059939	9430015G10Rik	638	708	767	879	1347	815	651	674	760	493	451	557	1175	748	595	698	753	670
ENSMUSG00000107709	9430018G01Rik	3	0	2	0	3	2	1	2	0	0	7	1	1	1	1	3	0	5
ENSMUSG00000087504	9430019J16Rik	0	0	0	0	0	0	0	0	0	0	0	0	0	0	0	0	0	0
ENSMUSG00000097073	9430037G07Rik	54	70	64	62	87	58	31	44	60	51	45	66	75	41	44	47	56	52
ENSMUSG00000040139	9430038I01Rik	189	194	215	223	319	171	198	178	198	207	162	237	346	217	197	181	192	199
ENSMUSG00000086155	9430041J12Rik	0	0	1	1	2	1	1	1	1	0	0	1	0	0	0	0	0	1
ENSMUSG00000100632	9430060I03Rik	9	6	4	6	12	7	3	5	4	9	3	4	7	14	3	10	4	5
ENSMUSG00000097360	9430065F17Rik	8	4	2	8	6	2	5	3	5	5	5	4	12	9	7	7	4	8
ENSMUSG00000094447	9430069I07Rik	6	7	1	4	4	1	1	3	2	0	0	1	4	0	3	3	2	1
ENSMUSG00000112765	9430078K24Rik	0	0	0	0	0	0	0	0	0	0	0	0	0	0	0	0	0	0
ENSMUSG00000023263	9530002B09Rik	0	0	0	0	0	0	0	0	0	0	0	0	0	0	0	0	0	0
ENSMUSG00000020177	9530003J23Rik	1	0	4	1	0	0	1	0	0	0	1	3	0	0	2	0	0	0
ENSMUSG00000113599	9530014B07Rik	0	0	0	0	0	0	0	0	0	0	0	0	0	0	0	0	0	0
ENSMUSG00000112041	9530020I12Rik	0	0	0	0	0	0	0	0	0	0	0	0	0	0	0	0	0	1
ENSMUSG00000085447	9530026F06Rik	0	0	0	0	0	0	0	0	0	0	0	0	0	0	0	0	0	0
ENSMUSG00000097462	9530026P05Rik	0	0	4	0	0	3	0	0	0	1	1	0	0	1	0	1	1	1
ENSMUSG00000086554	9530034E10Rik	5	0	0	0	0	0	0	0	0	0	0	0	0	0	0	1	0	0
ENSMUSG00000097726	9530036O11Rik	0	0	0	0	0	0	0	0	0	0	0	0	0	0	0	0	0	0
ENSMUSG00000085982	9530051G07Rik	0	0	0	0	0	0	0	0	0	0	0	0	0	0	0	0	0	0
ENSMUSG00000096938	9530052E02Rik	11	3	4	0	0	1	24	44	26	16	20	32	94	61	47	19	18	30
ENSMUSG00000078776	9530053A07Rik	1	3	3	1	1	5	12	18	16	7	3	5	22	11	10	18	13	26
ENSMUSG00000110591	9530057J20Rik	0	1	0	0	0	0	0	0	0	0	0	0	0	0	0	0	0	0
ENSMUSG00000097736	9530059O14Rik	0	0	0	0	0	0	0	0	0	0	0	0	0	0	0	0	0	0
ENSMUSG00000108030	9530062K07Rik	5	4	7	1	11	4	5	9	10	11	5	8	14	15	6	6	7	9
ENSMUSG00000036275	9530068E07Rik	4712	4329	4894	4508	6791	3993	4049	4618	4724	4003	3601	4462	8108	5094	4455	4641	4820	4508
ENSMUSG00000036411	9530077C05Rik	16	17	32	17	51	19	19	20	16	16	10	25	30	23	13	12	20	10
ENSMUSG00000044125	9530080O11Rik	4	2	1	4	4	3	1	1	1	4	2	3	2	5	12	3	2	3
ENSMUSG00000097006	9530082P21Rik	14	15	7	45	52	41	4	12	6	31	32	31	15	7	15	28	19	29
ENSMUSG00000097825	9630001P10Rik	1	1	0	0	1	1	0	1	0	0	0	0	0	0	0	0	2	1
ENSMUSG00000115529	9630013A20Rik	0	0	0	0	0	0	0	0	0	0	0	0	0	0	0	0	0	0
ENSMUSG00000086359	9630013K17Rik	2	1	2	2	0	6	2	7	3	4	1	1	7	3	5	1	1	5
ENSMUSG00000114284	9630015K15Rik	0	0	0	2	0	0	0	0	0	0	0	1	0	0	0	0	0	0
ENSMUSG00000051295	9630028B13Rik	0	0	0	0	0	1	3	0	0	1	1	1	0	0	0	0	0	0
ENSMUSG00000085631	9630028H03Rik	0	0	0	0	0	0	0	0	0	0	0	0	0	0	0	0	0	0
ENSMUSG00000117916	9630028I04Rik	344	359	389	150	263	142	202	234	254	289	212	270	760	481	351	130	132	108
ENSMUSG00000073386	9830107B12Rik	0	0	0	0	1	0	0	0	0	0	0	0	0	0	0	0	0	0
ENSMUSG00000104763	9830132P13Rik	10	10	9	0	6	3	1	3	6	0	2	0	8	6	7	6	5	1
ENSMUSG00000117763	9830166K06Rik	0	1	0	0	0	0	0	0	0	0	0	0	0	0	0	0	0	0
ENSMUSG00000044551	9930012K11Rik	145	127	203	154	231	139	168	212	194	180	181	207	284	196	142	175	161	139
ENSMUSG00000046138	9930021J03Rik	865	819	884	809	1228	711	726	860	752	690	651	881	1214	677	712	840	774	656
ENSMUSG00000042976	9930038B18Rik	0	0	0	0	1	0	0	0	0	0	1	0	0	0	0	0	0	0
ENSMUSG00000044730	9930104L06Rik	591	541	632	568	910	532	522	589	574	407	385	470	865	563	478	612	624	557
ENSMUSG00000100217	9930111H07Rik	0	0	1	0	0	0	1	0	0	1	0	0	0	0	1	0	0	0
ENSMUSG00000069893	9930111J21Rik1	294	256	273	876	1198	778	122	130	76	404	404	596	333	103	226	878	819	627
ENSMUSG00000069892	9930111J21Rik2	1433	1360	1436	3432	5319	3173	631	681	601	2006	1947	2614	1659	799	897	3201	2978	2377
ENSMUSG00000027596	a	0	0	0	0	0	0	0	0	0	0	0	0	0	0	0	0	0	0
ENSMUSG00000084897	a	25	15	26	29	26	16	13	12	7	12	10	15	24	14	16	13	11	14
ENSMUSG00000110357	A030001D20Rik	7	8	13	8	11	5	5	4	2	3	1	1	15	8	2	6	13	5
ENSMUSG00000079144	A130010J15Rik	501	466	533	575	899	537	364	369	414	369	367	464	565	341	323	312	323	348
ENSMUSG00000087061	A130030D18Rik	0	0	0	0	0	0	0	0	0	0	0	0	0	0	0	0	0	0
ENSMUSG00000112095	A130077B15Rik	188	165	157	195	258	140	146	176	207	133	137	198	300	162	172	141	143	141
ENSMUSG00000022347	A1bg	0	0	0	0	0	0	0	0	0	1	0	0	0	0	0	0	0	0
ENSMUSG00000052595	A1cf	4	2	5	5	4	2	3	4	1	3	3	4	4	3	5	4	6	3
ENSMUSG00000105891	A230001M10Rik	0	0	0	0	0	0	0	0	0	0	0	0	0	0	0	0	0	0
ENSMUSG00000087306	A230004M16Rik	7	11	10	7	10	6	1	9	7	5	5	8	6	5	6	7	3	5
ENSMUSG00000089633	A230009B12Rik	2	0	0	1	1	0	0	0	0	0	1	0	1	0	0	0	3	1
ENSMUSG00000097845	A230020J21Rik	46	41	43	38	70	25	28	32	21	28	6	38	32	5	15	25	18	40
ENSMUSG00000096960	A230028O05Rik	37	25	27	39	73	30	45	65	76	113	83	113	32	12	19	30	22	22
ENSMUSG00000117172	A230051N06Rik	0	0	0	0	0	0	0	0	0	1	0	0	0	0	0	0	0	0
ENSMUSG00000020887	A230052G05Rik	0	0	1	0	0	0	0	0	0	0	0	1	0	0	0	0	0	0
ENSMUSG00000109394	A230057D06Rik	13	26	27	24	44	31	20	21	29	16	14	27	40	23	33	17	16	23
ENSMUSG00000084771	A230072E10Rik	5	11	4	9	12	6	4	4	8	6	2	8	22	9	8	11	5	1
ENSMUSG00000074473	A230072I06Rik	0	0	0	0	0	0	0	0	0	0	0	0	0	0	0	0	0	0
ENSMUSG00000100600	A230077H06Rik	5	4	1	2	3	1	1	0	1	3	3	2	2	5	2	1	1	1
ENSMUSG00000055818	A230083G16Rik	16	7	9	8	14	10	7	10	13	5	3	7	27	13	22	9	5	6
ENSMUSG00000087026	A230103J11Rik	23	19	17	15	31	14	12	20	18	10	13	4	45	19	22	22	18	28
ENSMUSG00000097292	A230107N01Rik	9	16	15	3	18	12	5	11	10	12	8	9	22	15	13	13	10	7
ENSMUSG00000087125	A230108P19Rik	1	0	1	1	0	0	0	0	1	3	0	3	0	0	0	0	0	0
ENSMUSG00000109344	A26c2	0	0	0	0	0	0	0	0	0	0	0	0	0	0	0	0	0	0
ENSMUSG00000027157	A26c3	0	0	0	0	0	0	0	0	0	0	0	0	0	0	0	0	0	0
ENSMUSG00000030111	A2m	0	0	0	0	0	0	0	0	0	0	0	0	0	0	0	0	0	0
ENSMUSG00000047228	A2ml1	1	0	1	1	2	0	1	0	0	1	1	0	2	1	2	2	0	1
ENSMUSG00000052479	A330008L17Rik	0	0	0	0	0	0	0	0	0	0	0	1	1	0	0	0	0	0
ENSMUSG00000097915	A330009N23Rik	2	4	6	10	0	4	3	1	3	3	3	5	3	4	1	3	7	1
ENSMUSG00000104093	A330015K06Rik	5	1	0	2	2	1	0	0	2	0	0	1	2	0	1	0	3	0
ENSMUSG00000096929	A330023F24Rik	16	23	16	11	12	17	10	15	7	39	22	36	16	27	16	18	15	7
ENSMUSG00000097591	A330032B11Rik	1	4	5	9	5	7	4	4	8	12	0	10	5	7	8	5	3	7
ENSMUSG00000097622	A330033J07Rik	0	0	0	0	0	0	0	0	1	0	0	0	0	0	0	0	0	0
ENSMUSG00000086213	A330040F15Rik	9	5	10	6	10	20	10	8	10	13	17	6	8	9	7	14	10	10
ENSMUSG00000087466	A330041J22Rik	0	0	2	0	1	0	0	1	0	0	0	0	0	0	0	0	0	0
ENSMUSG00000097326	A330048O09Rik	0	0	0	0	0	0	0	0	0	0	0	0	0	0	0	0	0	0
ENSMUSG00000111994	A330049N07Rik	3	1	1	2	4	3	1	1	2	3	3	5	1	0	1	4	2	1
ENSMUSG00000052014	A330070K13Rik	0	0	0	0	0	0	0	0	0	0	0	0	0	0	0	0	0	0
ENSMUSG00000097960	A330074K22Rik	13	19	16	27	21	13	33	40	32	37	33	40	90	34	45	22	28	12
ENSMUSG00000113186	A330076C08Rik	0	0	0	1	2	0	1	0	0	0	0	1	1	0	1	1	0	1
ENSMUSG00000109321	A330076H08Rik	0	0	0	0	0	0	0	0	0	0	0	0	0	0	0	0	0	0
ENSMUSG00000097666	A330094K24Rik	0	0	0	0	0	0	0	0	0	0	0	0	0	0	0	0	0	0
ENSMUSG00000086363	A330102I10Rik	0	0	0	0	0	0	0	0	0	0	0	0	0	0	0	0	0	0
ENSMUSG00000028794	A3galt2	1	2	3	1	3	1	1	1	3	2	4	6	3	5	1	5	1	4
ENSMUSG00000047613	A430005L14Rik	1062	1063	1147	1174	1762	1037	793	834	829	797	696	824	1315	965	749	765	778	759
ENSMUSG00000056014	A430033K04Rik	174	190	217	133	223	155	115	128	106	90	101	95	255	141	144	94	124	97
ENSMUSG00000087305	A430035B10Rik	8	7	9	2	5	2	8	10	6	2	4	3	16	8	9	6	8	3
ENSMUSG00000090564	A430057M04Rik	81	55	91	67	112	66	86	84	85	65	85	64	143	103	77	84	73	79
ENSMUSG00000085589	A430078I02Rik	0	0	2	1	1	0	0	1	2	1	0	0	1	0	1	0	1	3
ENSMUSG00000116220	A430088P11Rik	1	0	1	0	0	0	0	0	0	0	0	0	0	0	0	0	0	0
ENSMUSG00000094560	A430089I19Rik	0	0	0	0	0	0	0	0	0	0	0	0	0	0	0	0	0	0
ENSMUSG00000114213	A430090L17Rik	2	0	0	0	0	1	0	0	0	1	0	0	1	1	0	0	0	0
ENSMUSG00000067577	A430093F15Rik	12	8	13	28	31	13	10	24	22	46	33	38	31	25	19	20	29	22
ENSMUSG00000086851	A430108G06Rik	17	9	9	12	11	7	3	5	2	5	6	7	13	6	5	6	3	3
ENSMUSG00000054135	A430110L20Rik	12	11	14	9	9	11	3	6	8	4	7	5	9	8	7	5	4	4
ENSMUSG00000047878	A4galt	0	0	2	0	1	0	0	0	0	0	0	1	2	0	0	3	1	1
ENSMUSG00000037953	A4gnt	0	0	0	0	1	0	0	0	0	0	0	0	0	0	0	0	1	0
ENSMUSG00000051986	A530006G24Rik	0	0	0	0	0	1	0	0	0	0	0	0	0	0	0	0	0	0
ENSMUSG00000110682	A530010L16Rik	0	0	0	0	0	0	0	0	0	0	0	0	0	0	0	1	0	0
ENSMUSG00000006462	A530013C23Rik	16	16	16	9	22	14	17	16	24	24	19	24	19	18	23	12	16	21
ENSMUSG00000043122	A530016L24Rik	0	2	0	0	0	0	0	0	0	0	0	0	0	0	0	0	0	0
ENSMUSG00000053528	A530021J07Rik	1	0	0	0	0	1	0	0	0	0	0	0	0	0	0	0	0	0
ENSMUSG00000089844	A530032D15Rik	10	11	11	144	193	109	10	8	7	117	110	129	8	0	3	42	39	39
ENSMUSG00000113338	A530046M15Rik	0	0	0	0	0	0	1	0	2	0	2	0	0	0	0	0	0	0
ENSMUSG00000046764	A530053G22Rik	0	0	0	0	0	0	0	0	0	0	0	0	0	0	0	0	0	0
ENSMUSG00000087694	A530058N18Rik	0	0	0	0	0	0	0	0	0	0	0	0	0	0	0	0	0	0
ENSMUSG00000043939	A530064D06Rik	6	7	4	5	9	4	4	7	4	2	1	5	4	7	5	7	6	5
ENSMUSG00000114531	A530065N20Rik	0	0	0	0	0	0	0	0	0	0	0	0	0	0	0	0	0	0
ENSMUSG00000085112	A530072M11Rik	6	6	7	5	16	8	8	8	5	16	3	12	12	6	3	7	15	4
ENSMUSG00000086124	A530076I17Rik	0	0	1	2	3	0	0	0	0	0	0	0	0	0	0	1	1	0
ENSMUSG00000117872	A530088E08Rik	0	0	0	0	0	1	0	0	1	0	0	0	0	0	0	0	0	0
ENSMUSG00000052760	A630001G21Rik	580	538	642	739	1161	705	608	771	857	643	644	739	736	497	412	589	612	651
ENSMUSG00000055110	A630012P03Rik	0	0	0	0	0	0	0	0	0	0	0	0	0	0	0	0	0	0
ENSMUSG00000114968	A630019I02Rik	0	0	0	0	0	0	0	0	0	0	0	0	0	0	0	0	0	0
ENSMUSG00000095493	A630023A22Rik	2	1	1	0	1	2	0	2	5	1	2	0	0	0	0	0	0	0
ENSMUSG00000048215	A630023P12Rik	0	0	0	0	0	0	0	0	0	0	0	0	0	0	0	0	0	0
ENSMUSG00000085387	A630050E04Rik	0	0	0	0	0	0	0	0	0	0	0	0	0	0	0	0	0	0
ENSMUSG00000101013	A630072M18Rik	104	98	96	99	155	67	124	91	140	36	31	61	257	189	162	104	142	123
ENSMUSG00000067541	A630073D07Rik	0	0	0	0	0	0	0	0	0	0	0	0	0	0	0	0	0	0
ENSMUSG00000094613	A630076J17Rik	7	3	9	1	2	3	1	0	0	0	0	1	4	5	0	0	2	0
ENSMUSG00000116673	A630089N07Rik	609	523	604	699	926	590	562	612	504	396	432	452	1041	524	579	641	654	594
ENSMUSG00000096094	A630095N17Rik	0	0	0	0	0	1	0	0	0	0	0	0	0	0	0	0	0	0
ENSMUSG00000103690	A730004F24Rik	0	0	0	0	0	0	0	0	0	0	0	0	0	0	0	0	0	0
ENSMUSG00000117334	A730006G06Rik	0	0	0	0	0	0	0	0	0	0	0	0	0	0	0	0	0	0
ENSMUSG00000044783	A730008H23Rik	7236	6609	7269	6485	9756	5943	5208	6072	6065	4495	4064	4947	7113	4333	4184	4422	4444	3803
ENSMUSG00000047384	A730013G03Rik	0	0	0	0	0	0	0	0	0	0	0	0	0	0	0	0	0	0
ENSMUSG00000047828	A730018C14Rik	0	0	0	0	0	0	0	0	0	0	0	0	0	0	0	0	0	0
ENSMUSG00000044522	A730020M07Rik	0	1	0	0	1	0	0	0	0	0	0	0	0	0	0	0	0	0
ENSMUSG00000085649	A730032A03Rik	0	0	0	0	0	0	0	0	0	0	2	0	0	0	0	0	0	1
ENSMUSG00000056738	A730036I17Rik	0	0	0	0	0	0	0	0	0	0	0	0	0	0	0	0	0	0
ENSMUSG00000111232	A730043L09Rik	2	0	0	0	0	0	0	1	0	0	0	0	1	1	0	0	0	0
ENSMUSG00000085139	A730046J19Rik	0	0	0	0	0	0	0	0	0	0	0	0	0	0	0	0	0	1
ENSMUSG00000097756	A730056A06Rik	0	0	0	0	0	0	0	0	0	0	0	0	0	0	0	0	0	0
ENSMUSG00000112639	A730063M14Rik	30	21	17	13	28	10	21	20	11	11	24	17	57	40	21	21	12	15
ENSMUSG00000086693	A730081D07Rik	5	3	2	6	11	7	1	4	6	6	1	3	6	2	5	2	4	2
ENSMUSG00000108379	A730082K24Rik	0	1	0	2	4	0	0	0	0	0	0	1	0	0	0	0	0	1
ENSMUSG00000100812	A730098A19Rik	0	0	0	0	0	0	0	0	0	0	0	0	0	0	0	0	0	0
ENSMUSG00000053181	A830005F24Rik	31	14	20	11	26	16	11	9	17	8	23	17	24	14	7	8	9	13
ENSMUSG00000097182	A830009L08Rik	0	0	0	0	0	0	0	0	0	0	0	0	0	0	0	0	0	0
ENSMUSG00000111375	A830010M20Rik	197	215	238	208	319	192	335	326	321	505	460	525	418	255	228	260	243	252
ENSMUSG00000089957	A830011K09Rik	0	0	0	0	0	0	0	0	0	0	0	0	0	0	0	0	0	0
ENSMUSG00000057715	A830018L16Rik	1	1	5	3	5	3	0	2	3	2	4	2	1	3	1	1	1	2
ENSMUSG00000105923	A830019L24Rik	0	0	0	0	0	0	0	0	0	0	0	0	0	1	0	0	0	0
ENSMUSG00000094707	A830019P07Rik	19	12	30	10	10	9	45	46	40	18	21	35	73	55	44	13	21	16
ENSMUSG00000103695	A830029E22Rik	0	0	0	0	0	0	0	0	0	0	0	0	0	0	0	0	0	0
ENSMUSG00000111329	A830035O19Rik	10	9	11	14	10	17	3	2	2	10	7	0	19	13	11	7	14	6
ENSMUSG00000084890	A830036E02Rik	0	0	0	0	0	0	0	0	0	0	0	0	0	0	0	1	0	0
ENSMUSG00000087143	A830082K12Rik	51	54	54	60	108	54	38	46	45	55	48	68	38	18	17	20	12	19
ENSMUSG00000112280	A830082N09Rik	39	44	48	36	58	24	43	56	37	12	42	23	61	32	41	36	37	24
ENSMUSG00000098008	A930001A20Rik	2	0	2	1	4	1	1	0	3	6	10	4	0	0	0	0	1	0
ENSMUSG00000087132	A930001C03Rik	5	3	6	7	7	6	7	10	11	9	9	7	23	10	19	5	12	10
ENSMUSG00000114961	A930002C04Rik	0	0	0	0	0	0	0	0	0	0	0	0	1	0	0	0	0	0
ENSMUSG00000075330	A930003A15Rik	0	0	0	0	0	0	0	0	0	0	0	0	0	0	0	1	0	0
ENSMUSG00000105076	A930003O13Rik	0	7	1	3	8	3	9	7	5	2	3	7	14	6	2	3	4	2
ENSMUSG00000054057	A930004D18Rik	181	170	178	142	183	104	185	206	196	157	118	151	353	191	197	144	168	140
ENSMUSG00000054426	A930005H10Rik	160	151	154	142	233	127	127	149	128	113	117	110	255	176	123	139	115	149
ENSMUSG00000087278	A930006I01Rik	0	0	0	0	0	0	0	0	0	0	0	0	0	0	0	0	0	0
ENSMUSG00000084866	A930006K02Rik	27	30	34	21	51	14	23	19	25	10	9	23	53	32	29	17	14	10
ENSMUSG00000097855	A930007I19Rik	36	46	36	109	199	112	9	7	16	47	42	40	27	18	19	22	29	25
ENSMUSG00000092210	A930009A15Rik	0	0	0	0	0	0	0	0	0	0	0	0	0	0	0	0	0	0
ENSMUSG00000089809	A930011G23Rik	616	577	612	1134	1865	1128	858	1062	1013	866	924	1036	1310	743	698	1029	1114	965
ENSMUSG00000097610	A930012L18Rik	0	0	0	0	0	0	0	0	0	0	0	0	0	0	0	0	0	0
ENSMUSG00000040705	A930016O22Rik	6	8	9	9	21	9	4	7	5	14	10	7	14	11	7	7	9	7
ENSMUSG00000025727	A930017K11Rik	0	1	4	2	1	0	2	3	0	1	1	2	5	6	1	2	9	3
ENSMUSG00000032671	A930018P22Rik	0	0	0	0	0	1	0	0	0	2	0	0	0	0	0	0	0	0
ENSMUSG00000085958	A930019D19Rik	2	1	2	1	0	0	3	1	2	1	1	3	4	0	3	1	1	0
ENSMUSG00000056735	A930024E05Rik	24	24	27	15	37	27	12	9	16	17	19	17	65	35	30	11	22	14
ENSMUSG00000115930	A930027H12Rik	0	0	0	0	0	0	0	0	0	0	0	0	0	0	0	0	0	0
ENSMUSG00000086262	A930031H19Rik	0	0	0	0	0	0	0	0	0	0	0	0	0	0	0	0	0	0
ENSMUSG00000090622	A930033H14Rik	2	0	0	3	1	0	1	0	2	1	0	0	2	1	1	0	0	1
ENSMUSG00000109408	A930037H05Rik	34	37	38	35	45	35	21	15	41	18	8	22	47	28	29	34	34	28
ENSMUSG00000085900	A930041C12Rik	0	0	0	0	1	1	0	0	1	0	0	0	0	0	0	1	0	0
ENSMUSG00000074357	AA386476	13	15	13	1	17	9	5	8	11	5	5	6	17	10	9	6	8	7
ENSMUSG00000117896	AA387883	1	0	0	1	2	1	4	3	3	3	2	2	2	6	1	4	2	0
ENSMUSG00000084381	AA413626	5	2	4	2	1	1	0	1	3	3	1	2	2	2	1	2	1	4
ENSMUSG00000083307	AA414768	108	98	112	104	173	102	70	83	95	72	47	76	167	89	86	76	89	68
ENSMUSG00000113342	AA414992	0	0	0	0	0	0	0	0	2	1	0	1	0	0	0	0	0	0
ENSMUSG00000093483	AA465934	26	14	24	21	55	27	35	34	22	15	22	20	50	27	20	14	24	18
ENSMUSG00000033213	AA467197	81	85	73	421	612	432	179	193	194	2622	2500	2967	245	124	101	1462	1505	1565
ENSMUSG00000115016	AA536875	0	0	0	0	0	0	0	0	0	0	0	0	0	0	0	0	0	0
ENSMUSG00000092125	AA543401	1	0	0	0	0	0	0	0	0	0	0	0	0	0	0	0	0	0
ENSMUSG00000073497	AA792892	0	0	0	0	0	0	0	0	0	0	0	0	0	0	0	0	0	0
ENSMUSG00000042510	AA986860	15	21	15	20	10	11	7	12	10	5	9	5	6	16	11	2	3	5
ENSMUSG00000036678	Aaas	1647	1475	1700	1751	2737	1673	1627	1862	2206	1566	1382	1717	2869	2101	1568	1760	1945	1858
ENSMUSG00000029482	Aacs	2067	1851	2039	1985	2960	1783	2338	2732	2917	2364	2062	2352	4289	2898	2524	2941	2946	2724
ENSMUSG00000027761	Aadac	32	18	37	25	39	34	21	33	33	24	39	30	56	33	20	53	64	48
ENSMUSG00000091376	Aadacl2	0	0	0	0	0	0	0	0	0	0	0	0	0	0	0	0	0	0
ENSMUSG00000036951	Aadacl2fm1	0	0	0	0	0	0	0	0	1	0	0	0	0	0	0	0	0	0
ENSMUSG00000090527	Aadacl2fm2	0	0	0	0	0	0	0	0	0	0	0	0	0	0	0	0	0	0
ENSMUSG00000095522	Aadacl2fm3	0	0	0	0	0	0	0	0	0	0	0	0	0	0	0	0	0	0
ENSMUSG00000078507	Aadacl3	0	0	0	0	0	0	0	0	0	0	0	0	0	0	0	0	0	0
ENSMUSG00000070609	Aadacl4	0	0	0	0	0	0	0	0	0	0	0	0	0	0	0	0	0	0
ENSMUSG00000028593	Aadacl4fm1	0	0	0	0	0	0	0	0	0	0	0	0	0	0	0	0	0	0
ENSMUSG00000078506	Aadacl4fm2	0	0	0	0	0	0	0	0	0	0	0	0	0	0	0	0	0	0
ENSMUSG00000041735	AAdacl4fm3	0	0	0	0	0	0	0	0	0	0	0	0	0	0	0	0	0	0
ENSMUSG00000078505	Aadacl4fm4	0	0	0	0	0	0	0	0	0	0	0	0	0	0	0	0	0	0
ENSMUSG00000078504	Aadacl4fm5	0	0	0	0	0	0	0	0	0	0	0	0	0	0	0	0	0	0
ENSMUSG00000057228	Aadat	7	4	7	4	4	6	6	4	4	2	4	3	8	2	2	4	8	12
ENSMUSG00000037257	Aagab	2099	1873	2201	2042	2999	1760	1923	2086	2396	1903	1742	2008	4248	2911	2323	1980	2017	1840
ENSMUSG00000057230	Aak1	2701	2580	2574	2692	4100	2501	2178	2509	2158	2463	2473	3122	3882	2062	2183	2776	2741	2276
ENSMUSG00000035642	Aamdc	106	113	105	77	101	64	74	57	75	44	44	76	162	123	58	53	62	54
ENSMUSG00000006299	Aamp	5494	4767	5552	4411	6731	3797	4150	4484	5174	4564	4006	4766	7058	5097	3938	3685	3936	3849
ENSMUSG00000020804	Aanat	0	0	1	3	1	0	1	0	0	1	0	0	0	0	0	0	3	0
ENSMUSG00000027628	Aar2	1878	1603	1874	1847	2639	1476	1749	1899	2101	1765	1606	1914	3439	2389	1921	1938	2029	1863
ENSMUSG00000068522	Aard	0	0	1	0	0	0	0	0	0	1	0	0	0	0	0	0	0	0
ENSMUSG00000031960	Aars	6056	5829	6563	10909	16904	9719	3394	3810	4190	5080	4764	5716	6071	4267	3631	5900	6057	5859
ENSMUSG00000023938	Aars2	696	617	690	652	1027	569	527	594	648	487	411	494	1032	698	622	591	599	607
ENSMUSG00000075528	Aarsd1	1457	1455	1622	1462	2217	1306	1258	1348	1604	999	872	1062	2065	1447	1132	1073	1190	1107
ENSMUSG00000055923	Aasdh	333	278	339	319	519	302	245	316	332	271	220	263	522	359	299	322	291	242
ENSMUSG00000025894	Aasdhppt	968	813	992	831	1354	765	883	922	1054	502	522	601	1719	1017	873	818	854	965
ENSMUSG00000029695	Aass	12	16	14	15	21	20	11	17	19	15	22	21	30	17	11	25	38	22
ENSMUSG00000018697	Aatf	1315	1233	1329	1354	1922	1205	1084	1182	1372	718	650	749	2118	1427	1139	1207	1293	1252
ENSMUSG00000025375	Aatk	466	378	469	674	938	641	180	205	199	802	651	740	482	285	236	215	212	215
ENSMUSG00000057191	AB124611	906	863	997	874	1202	707	951	1004	1133	1497	1333	1658	1374	979	724	1054	1152	1101
ENSMUSG00000057880	Abat	16	15	23	15	25	13	12	10	10	12	17	15	32	20	10	24	18	19
ENSMUSG00000015243	Abca1	6065	6150	6346	6574	9937	6156	4417	5028	3926	3961	3950	5371	8949	3974	5113	7549	7415	6118
ENSMUSG00000050296	Abca12	1	0	0	2	1	2	0	0	0	0	2	0	0	0	0	0	0	0
ENSMUSG00000004668	Abca13	18	25	26	8	30	19	27	35	32	49	40	48	21	10	7	21	23	13
ENSMUSG00000062017	Abca14	0	0	0	0	0	1	0	0	0	0	0	0	0	0	0	0	0	0
ENSMUSG00000054746	Abca15	0	0	0	0	0	0	0	0	0	0	0	0	0	0	0	0	0	0
ENSMUSG00000051900	Abca16	0	0	0	0	0	0	0	0	0	0	0	0	0	0	0	0	0	0
ENSMUSG00000035435	Abca17	3	2	2	4	5	0	3	3	1	1	0	3	0	2	3	2	0	2
ENSMUSG00000026944	Abca2	1205	1036	1118	1028	1497	926	784	929	956	646	546	646	1919	1240	1172	776	747	688
ENSMUSG00000024130	Abca3	1661	1583	1732	1717	2665	1612	1564	1851	1768	1870	1774	2206	2455	1479	1310	1529	1637	1374
ENSMUSG00000028125	Abca4	1	2	1	1	4	1	2	3	1	2	1	1	0	0	0	1	7	0
ENSMUSG00000018800	Abca5	441	453	418	398	600	344	365	423	385	385	360	484	642	335	359	291	321	271
ENSMUSG00000044749	Abca6	217	262	251	98	146	90	200	237	202	106	72	140	575	275	321	124	103	115
ENSMUSG00000035722	Abca7	930	901	1050	1102	1501	990	983	1116	1135	1765	1519	1769	2013	1472	1188	1441	1430	1233
ENSMUSG00000041828	Abca8a	12	20	14	14	26	18	6	9	11	6	8	11	53	23	28	26	38	30
ENSMUSG00000020620	Abca8b	74	74	63	83	86	66	150	153	138	102	97	114	353	199	239	118	127	101
ENSMUSG00000041797	Abca9	2895	2521	2846	865	1300	751	1586	1909	1779	456	498	645	4479	2128	2537	1145	1176	939
ENSMUSG00000031974	Abcb10	581	559	627	579	882	508	573	657	656	520	496	605	849	594	481	566	559	556
ENSMUSG00000027048	Abcb11	9	6	19	24	20	24	10	19	18	14	27	18	25	25	20	31	38	27
ENSMUSG00000040584	Abcb1a	99	149	146	183	285	186	40	53	38	150	125	149	241	198	153	230	275	245
ENSMUSG00000028970	Abcb1b	2744	2501	2780	2712	4052	2464	2685	2980	3149	1647	1669	1999	5230	3076	2973	3299	3365	3047
ENSMUSG00000042476	Abcb4	242	216	269	59	94	59	358	425	449	158	130	186	452	281	269	150	132	123
ENSMUSG00000072791	Abcb5	0	0	0	0	0	0	0	0	0	0	0	0	0	0	0	0	0	0
ENSMUSG00000026198	Abcb6	1293	1233	1321	1108	1735	997	726	815	932	613	520	682	1124	703	633	446	447	416
ENSMUSG00000031333	Abcb7	3475	3357	3655	2931	4413	2754	3012	3370	2915	1919	1797	2413	4779	2636	2928	2685	2666	2399
ENSMUSG00000028973	Abcb8	1481	1311	1541	1381	2146	1253	1387	1607	1836	1190	1084	1237	2843	1987	1594	1289	1434	1250
ENSMUSG00000029408	Abcb9	45	26	33	31	47	16	35	28	43	29	23	14	177	193	114	68	63	82
ENSMUSG00000023088	Abcc1	5260	4976	5670	5245	8180	4802	4990	5802	5612	5478	5013	5961	8607	5237	4816	5570	5450	4946
ENSMUSG00000032842	Abcc10	207	183	205	233	320	197	126	174	165	211	188	255	276	193	138	175	136	131
ENSMUSG00000036872	Abcc12	0	0	0	0	1	1	0	0	0	0	0	1	1	0	0	0	0	0
ENSMUSG00000025194	Abcc2	26	27	46	28	54	37	24	37	43	30	29	29	50	45	31	57	57	44
ENSMUSG00000020865	Abcc3	1086	956	1104	750	1127	695	1762	2056	2260	1686	1567	1917	2191	1419	1334	922	832	746
ENSMUSG00000032849	Abcc4	2373	2219	2562	2447	3829	2297	2411	2721	2744	2032	1931	2393	3781	2209	2198	2632	2695	2420
ENSMUSG00000022822	Abcc5	1561	1456	1686	2413	3632	2227	1822	2099	1861	3518	3054	3806	3930	2365	2041	2550	2732	2332
ENSMUSG00000030834	Abcc6	1	6	5	8	7	1	6	2	2	10	10	6	11	8	2	12	16	13
ENSMUSG00000040136	Abcc8	1	1	5	5	8	8	1	0	0	1	3	0	3	4	1	8	10	4
ENSMUSG00000030249	Abcc9	3	11	5	5	9	5	9	4	1	2	1	5	4	3	3	4	4	8
ENSMUSG00000031378	Abcd1	1150	1139	1257	983	1530	950	1399	1623	1686	1276	1063	1365	2074	1311	1121	1378	1373	1228
ENSMUSG00000055782	Abcd2	226	209	228	107	157	82	44	42	40	54	29	44	291	142	150	81	94	69
ENSMUSG00000028127	Abcd3	3242	3084	3484	2693	4227	2394	2206	2505	2535	1950	1835	2294	5177	3017	2906	2918	2991	2635
ENSMUSG00000021240	Abcd4	401	393	439	527	772	485	569	682	670	1490	1235	1490	721	517	402	517	504	501
ENSMUSG00000058355	Abce1	11399	10714	11832	10640	16373	9386	10143	11227	11530	7151	6901	9008	16576	9411	9476	11164	11184	10411
ENSMUSG00000038762	Abcf1	8833	8083	9147	8581	13512	7940	7155	8415	9285	6691	6225	7354	14598	10720	8234	9122	9031	8538
ENSMUSG00000028953	Abcf2	6074	5682	6378	6005	9556	5497	4887	5514	6121	4314	4005	4608	9255	6387	5188	5824	6060	5890
ENSMUSG00000003234	Abcf3	1694	1556	1755	1535	2320	1323	1270	1419	1572	1266	1170	1339	2431	1678	1378	1402	1498	1381
ENSMUSG00000024030	Abcg1	3762	3458	4018	4321	6702	3985	4393	4918	4620	5762	5402	6233	8624	5950	4705	5345	5201	4837
ENSMUSG00000029802	Abcg2	1698	1646	1912	1872	3023	1770	1892	2018	2086	2085	2005	2369	2912	1852	1643	1966	2046	1836
ENSMUSG00000029299	Abcg3	1	2	0	0	2	4	0	1	1	0	0	0	2	0	0	3	1	0
ENSMUSG00000032131	Abcg4	10	8	10	20	23	19	15	28	14	16	6	8	22	8	10	18	14	10
ENSMUSG00000040505	Abcg5	9	2	3	4	5	7	5	3	4	5	3	12	8	8	6	9	9	7
ENSMUSG00000024254	Abcg8	2	2	2	4	7	6	2	3	7	4	8	7	10	9	9	7	7	7
ENSMUSG00000006638	Abhd1	20	20	22	34	36	17	18	20	25	30	30	18	44	23	20	26	23	26
ENSMUSG00000033157	Abhd10	554	535	549	514	811	411	722	820	823	887	740	923	1004	649	554	616	601	595
ENSMUSG00000040532	Abhd11	1099	981	1144	1083	1656	956	1031	1191	1383	988	800	1025	1956	1409	1138	1222	1383	1339
ENSMUSG00000085042	Abhd11os	5	2	1	3	5	3	2	3	3	1	2	2	4	6	7	2	4	1
ENSMUSG00000032046	Abhd12	3816	3553	3990	2514	3696	2260	3787	4171	4637	2996	2766	3394	5287	3484	2927	2529	2709	2583
ENSMUSG00000090121	Abhd12b	0	0	1	0	2	0	0	0	1	0	1	0	0	0	3	0	0	0
ENSMUSG00000040396	Abhd13	1278	1249	1436	1722	2576	1438	1262	1396	1377	1751	1701	2149	1816	1085	1008	1515	1579	1473
ENSMUSG00000042210	Abhd14a	598	486	534	518	759	416	472	580	697	488	406	504	1031	779	567	491	552	540
ENSMUSG00000042073	Abhd14b	438	355	504	375	560	311	229	275	280	310	296	348	575	477	324	327	291	294
ENSMUSG00000000686	Abhd15	214	167	222	157	241	143	91	101	143	162	136	184	256	169	164	183	145	139
ENSMUSG00000007036	Abhd16a	934	784	956	1433	2066	1272	878	1057	1160	1869	1648	2028	1527	1054	850	1561	1665	1688
ENSMUSG00000055882	Abhd16b	3	3	1	1	1	2	1	1	8	1	3	2	5	3	3	4	5	3
ENSMUSG00000003346	Abhd17a	2130	1993	2245	2281	3559	2098	2233	2611	2893	2828	2382	2962	3642	2623	1972	2192	2419	2340
ENSMUSG00000047368	Abhd17b	890	875	905	896	1404	780	806	894	898	799	723	928	1557	923	884	982	977	902
ENSMUSG00000038459	Abhd17c	2239	2063	2413	2160	3371	1959	2172	2236	2433	1571	1569	1866	3235	2090	1902	2539	2442	2540
ENSMUSG00000037818	Abhd18	161	164	202	108	155	92	70	74	56	84	90	100	156	101	93	88	89	81
ENSMUSG00000039202	Abhd2	1097	1041	1109	1172	1931	1203	770	919	842	907	909	1147	1453	854	833	1223	1183	986
ENSMUSG00000002475	Abhd3	31	35	36	44	74	44	28	29	21	32	31	65	36	32	26	24	20	30
ENSMUSG00000040997	Abhd4	1256	1147	1231	1233	1799	1156	1500	1624	1909	1436	1310	1408	2485	1583	1343	1308	1371	1325
ENSMUSG00000032540	Abhd5	1340	1121	1284	1190	1849	1102	1133	1223	1390	1190	1078	1357	1750	1056	922	1043	1136	999
ENSMUSG00000025277	Abhd6	542	479	571	566	845	556	377	420	444	599	524	660	1048	636	556	505	468	514
ENSMUSG00000007950	Abhd8	707	641	718	609	855	525	583	643	673	728	639	835	1285	858	641	550	670	541
ENSMUSG00000058835	Abi1	3294	3157	3391	3015	4664	2767	2871	3173	3158	2662	2445	3179	5344	3060	3023	3189	3302	3107
ENSMUSG00000026782	Abi2	2551	2550	2721	2251	3429	2002	1855	1976	1910	1582	1490	1858	2704	1553	1532	1446	1276	1222
ENSMUSG00000018381	Abi3	853	710	845	641	964	566	890	901	995	690	590	627	1536	1057	899	674	713	603
ENSMUSG00000035258	Abi3bp	2	2	5	4	3	1	2	4	2	1	1	6	4	6	0	3	4	2
ENSMUSG00000038827	Abitram	1213	1150	1271	1278	1957	1136	958	1143	1301	762	729	916	1894	1307	1175	1346	1291	1156
ENSMUSG00000026842	Abl1	3173	3020	3343	2624	3781	2424	2405	2763	2998	1805	1687	2022	5762	3817	3264	2885	2767	2572
ENSMUSG00000026596	Abl2	5339	4896	5366	5141	7872	4632	3667	4410	3772	3199	3067	3887	5474	2880	3258	3949	3766	3331
ENSMUSG00000025085	Ablim1	0	1	0	1	0	1	2	1	2	1	2	2	3	4	3	0	4	2
ENSMUSG00000029095	Ablim2	6	2	10	15	12	15	6	3	7	18	8	12	6	1	2	1	2	5
ENSMUSG00000032735	Ablim3	5	2	13	10	6	6	11	10	7	19	6	4	38	29	22	7	6	9
ENSMUSG00000015787	Abo	0	0	0	0	0	0	0	0	0	0	0	0	0	0	0	0	0	0
ENSMUSG00000017631	Abr	5981	5541	6173	6485	9783	5755	8415	9806	9275	10577	9633	11625	12534	7326	7053	8624	8390	7504
ENSMUSG00000042895	Abra	0	1	1	0	0	2	0	0	0	0	0	0	0	1	1	0	0	2
ENSMUSG00000078453	Abracl	1298	1220	1353	1669	2486	1339	1307	1350	1622	1288	1225	1441	2235	1579	1273	1416	1552	1609
ENSMUSG00000035234	Abraxas1	583	573	654	653	1146	640	490	560	565	406	391	452	903	618	527	542	462	529
ENSMUSG00000030965	Abraxas2	1733	1625	1811	1709	2558	1610	1343	1521	1596	1605	1323	1602	2845	1782	1564	1713	1702	1632
ENSMUSG00000036376	Abt1	942	776	987	894	1499	909	957	957	1167	874	752	867	1523	1064	809	1013	944	982
ENSMUSG00000030083	Abtb1	401	378	389	221	311	227	184	205	217	213	168	211	625	436	372	190	188	208
ENSMUSG00000032724	Abtb2	379	404	400	498	744	451	423	495	427	790	689	770	434	261	280	555	525	547
ENSMUSG00000036138	Acaa1a	2954	2664	2927	2987	4314	2674	4372	5000	5204	4902	4325	4844	7371	5353	3971	4566	4881	4562
ENSMUSG00000010651	Acaa1b	74	60	93	75	141	87	47	80	66	89	94	102	173	74	49	123	105	98
ENSMUSG00000036880	Acaa2	1675	1473	1727	1293	2012	1220	1451	1661	1813	1664	1379	1721	2476	1691	1310	1026	979	1041
ENSMUSG00000020532	Acaca	4972	4741	5057	4343	6739	3991	4224	5077	4709	3513	3290	4408	7296	4250	4174	4636	4706	4122
ENSMUSG00000042010	Acacb	130	112	124	150	235	125	68	80	74	182	159	224	171	147	108	129	166	140
ENSMUSG00000029456	Acad10	190	173	178	135	211	162	207	262	248	226	186	203	302	225	184	129	158	117
ENSMUSG00000090150	Acad11	717	598	736	614	921	554	617	719	664	683	637	807	1214	727	682	765	784	685
ENSMUSG00000042647	Acad12	214	200	221	155	227	139	196	256	308	177	150	206	378	267	210	149	145	121
ENSMUSG00000031969	Acad8	692	613	680	615	907	537	712	758	876	480	478	526	1238	882	656	639	647	609
ENSMUSG00000027710	Acad9	1222	1074	1231	1062	1702	994	962	1103	1225	714	690	766	1807	1136	980	926	957	934
ENSMUSG00000026003	Acadl	1931	1824	2040	2073	3240	1915	2048	2327	2443	2779	2339	2728	3358	2206	1820	1947	1994	1811
ENSMUSG00000062908	Acadm	3283	2958	3411	2459	3773	2211	2576	2699	3042	1888	1815	2134	6179	3781	3321	2880	2821	2715
ENSMUSG00000029545	Acads	1541	1386	1576	1243	1671	979	1439	1639	1771	1437	1247	1476	2525	1883	1362	1106	1154	1162
ENSMUSG00000030861	Acadsb	1729	1599	1772	1361	2049	1291	1316	1353	1368	1332	1206	1409	3036	1749	1769	1689	1746	1658
ENSMUSG00000018574	Acadvl	1726	1519	1821	1491	2217	1327	1706	2093	2235	1689	1540	1706	3254	2220	1869	1607	1726	1675
ENSMUSG00000030607	Acan	0	0	0	0	0	0	0	0	0	0	0	0	0	0	0	0	0	0
ENSMUSG00000001588	Acap1	369	363	431	874	1391	860	80	93	86	341	271	344	418	323	241	281	264	293
ENSMUSG00000049076	Acap2	5351	5038	5356	5228	7839	4701	3630	4278	3753	4017	3823	4857	7265	3848	4139	4487	4474	3919
ENSMUSG00000029033	Acap3	841	710	803	654	1050	569	559	650	786	478	413	540	1179	786	625	713	737	680
ENSMUSG00000032047	Acat1	4137	4090	4393	3644	5550	3300	2670	3004	3477	2277	2072	2382	5839	3838	3221	3002	3250	3098
ENSMUSG00000023832	Acat2	2098	1895	2118	1483	2397	1313	2559	2961	3200	2581	2378	2701	3433	2438	1986	2170	2186	2082
ENSMUSG00000062480	Acat3	32	22	43	28	41	30	16	38	21	26	21	17	59	39	25	58	45	29
ENSMUSG00000026499	Acbd3	2377	2341	2574	2707	4187	2470	2138	2397	2557	2594	2280	2905	2789	1773	1511	2022	2054	2010
ENSMUSG00000056938	Acbd4	188	191	200	249	365	228	139	180	175	358	281	361	274	209	152	156	157	157
ENSMUSG00000026781	Acbd5	1508	1562	1662	1317	2059	1350	1111	1222	1082	957	1013	1236	2525	1231	1298	1281	1395	1286
ENSMUSG00000033701	Acbd6	2108	1865	2243	2317	3510	2206	1787	2128	2219	2004	1672	2003	2536	1788	1461	1655	1647	1639
ENSMUSG00000026644	Acbd7	0	0	0	1	0	0	0	0	0	0	0	0	0	0	1	0	0	0
ENSMUSG00000040272	Accs	188	212	189	210	313	167	142	192	213	154	121	139	370	274	206	135	129	132
ENSMUSG00000075023	Accsl	3	4	1	2	0	0	1	0	0	0	0	0	6	2	1	0	0	0
ENSMUSG00000038000	Acd	945	951	999	919	1420	870	658	752	827	784	715	882	1330	899	720	722	735	693
ENSMUSG00000020681	Ace	0	0	0	0	0	0	0	0	1	0	0	0	2	0	0	0	0	0
ENSMUSG00000015405	Ace2	0	0	1	0	0	1	0	0	0	0	0	0	1	0	1	0	0	0
ENSMUSG00000101605	Ace3	0	0	0	0	0	0	0	0	0	0	0	0	0	0	0	0	0	0
ENSMUSG00000045019	Acer1	2	0	1	1	2	1	0	0	2	0	0	3	0	0	0	1	2	0
ENSMUSG00000038007	Acer2	3	1	2	0	4	4	1	0	2	0	0	0	1	5	2	4	8	2
ENSMUSG00000030760	Acer3	697	621	730	928	1364	785	614	699	705	691	665	746	1086	681	639	729	775	736
ENSMUSG00000023328	Ache	8	12	9	6	6	3	3	2	6	6	15	8	18	13	8	4	6	1
ENSMUSG00000022185	Acin1	7773	7097	8131	7156	11440	6466	6052	6969	7653	3994	4008	4804	11792	7637	6772	7150	7325	7004
ENSMUSG00000037872	Ackr1	0	0	1	0	1	0	0	0	0	1	0	0	1	2	0	0	0	0
ENSMUSG00000044534	Ackr2	0	0	0	1	4	0	0	1	0	0	1	0	0	0	3	0	0	0
ENSMUSG00000044337	Ackr3	0	0	0	0	0	0	0	0	0	0	0	0	0	0	0	0	0	0
ENSMUSG00000079355	Ackr4	2	3	7	1	2	3	2	1	0	2	3	4	4	2	3	6	3	1
ENSMUSG00000020917	Acly	11161	10514	11882	10861	16529	9844	10583	12280	12397	11101	10293	12251	19373	12217	11220	12259	12357	11182
ENSMUSG00000026348	Acmsd	2	0	3	2	1	3	0	3	2	1	1	1	3	1	2	2	3	4
ENSMUSG00000070985	Acnat1	1	0	1	1	2	0	3	2	2	3	3	0	5	1	0	2	3	3
ENSMUSG00000060317	Acnat2	0	2	1	4	2	2	1	4	2	3	7	1	7	3	3	7	4	8
ENSMUSG00000028405	Aco1	1879	1717	1903	2087	3038	1918	1668	1871	1981	1865	1744	2075	3318	2163	1877	2287	2339	2222
ENSMUSG00000022477	Aco2	8189	7473	8425	7820	11516	7045	8137	9028	9970	8183	7222	8622	13704	9273	7504	7265	7754	7056
ENSMUSG00000022126	Acod1	418	423	441	23889	35860	21326	1980	2221	2133	48432	45107	54483	890	610	449	44757	46084	42139
ENSMUSG00000072949	Acot1	444	376	397	281	430	262	290	296	323	248	258	253	982	714	546	275	316	268
ENSMUSG00000047565	Acot10	0	0	1	0	0	0	0	0	0	0	0	0	0	0	0	0	0	0
ENSMUSG00000034853	Acot11	0	1	2	0	3	0	0	1	1	0	0	0	1	0	0	2	1	0
ENSMUSG00000021620	Acot12	9	9	14	10	9	11	2	7	4	8	5	13	19	17	9	12	7	14
ENSMUSG00000006717	Acot13	598	551	682	585	849	527	567	603	685	577	510	554	905	714	526	390	502	423
ENSMUSG00000021226	Acot2	326	291	344	303	377	277	220	257	253	204	171	195	555	401	304	215	226	205
ENSMUSG00000021228	Acot3	1	7	3	6	6	7	6	1	8	2	2	2	5	8	3	6	3	5
ENSMUSG00000052392	Acot4	14	13	13	8	12	13	10	12	14	7	19	19	22	7	13	17	11	17
ENSMUSG00000042540	Acot5	0	0	0	0	0	0	0	0	0	0	0	0	0	0	0	0	0	0
ENSMUSG00000043487	Acot6	1	0	0	1	2	3	2	0	2	3	0	0	3	2	1	1	0	1
ENSMUSG00000028937	Acot7	2776	2650	3049	3737	5694	3350	2981	3299	3772	4169	3785	4362	5037	3681	2786	3947	4214	4448
ENSMUSG00000017307	Acot8	515	428	494	486	791	481	550	588	666	639	554	672	931	645	507	563	616	610
ENSMUSG00000025287	Acot9	894	846	993	1719	2631	1446	988	1049	1104	1400	1357	1554	1399	927	740	1465	1601	1616
ENSMUSG00000020777	Acox1	2439	2254	2557	2231	3309	2006	2277	2719	2973	2511	2188	2645	4204	2568	2369	2534	2551	2296
ENSMUSG00000021751	Acox2	10	3	12	11	6	5	4	7	8	7	18	10	21	6	5	17	17	20
ENSMUSG00000029098	Acox3	730	687	722	1690	2493	1480	751	909	846	2443	2151	2737	1214	752	670	929	915	845
ENSMUSG00000027380	Acoxl	39	30	32	79	96	71	73	91	92	165	119	171	88	67	54	75	98	98
ENSMUSG00000044573	Acp1	4504	4039	4581	4068	6111	3661	4271	4594	5373	3849	3582	4250	7085	4778	3784	3772	4014	3956
ENSMUSG00000002103	Acp2	960	831	1031	1209	1706	1056	1038	1218	1376	1046	1008	1228	1626	1039	980	1288	1311	1120
ENSMUSG00000012777	Acp4	0	0	0	0	3	1	1	0	0	0	0	0	0	1	0	0	0	1
ENSMUSG00000001348	Acp5	5	3	10	7	16	11	8	17	13	7	6	13	15	18	17	17	15	11
ENSMUSG00000028093	Acp6	1519	1376	1592	1347	1935	1216	1090	1175	1355	889	805	1028	2346	1665	1263	1199	1234	1226
ENSMUSG00000037469	Acp7	0	0	0	0	0	0	0	0	0	0	0	0	1	0	0	0	0	0
ENSMUSG00000032561	Acpp	56	48	51	37	56	35	0	2	6	6	4	4	31	9	15	13	24	11
ENSMUSG00000022622	Acr	0	0	0	0	0	0	0	0	0	0	0	0	0	0	0	0	0	0
ENSMUSG00000072770	Acrbp	70	48	58	42	57	43	38	17	40	24	24	35	89	62	59	33	38	32
ENSMUSG00000032110	Acrv1	0	1	0	0	1	0	0	0	0	1	0	0	2	0	0	2	1	0
ENSMUSG00000032281	Acsbg1	25	18	42	18	23	18	49	62	69	44	35	47	43	30	23	8	19	16
ENSMUSG00000024207	Acsbg2	0	0	0	0	0	0	0	0	0	0	0	0	0	0	0	0	0	0
ENSMUSG00000024209	Acsbg3	37	12	28	36	68	31	42	44	59	62	46	61	88	43	37	30	34	36
ENSMUSG00000076435	Acsf2	17	11	12	21	27	25	7	19	26	22	24	22	45	13	15	27	23	19
ENSMUSG00000015016	Acsf3	299	275	301	291	445	296	135	181	189	142	115	153	353	240	197	199	185	206
ENSMUSG00000018796	Acsl1	1875	1878	2068	4967	7491	4468	2123	2544	2569	5156	5091	6121	3201	1879	1804	4886	5233	4505
ENSMUSG00000032883	Acsl3	2807	2511	2870	2126	3233	1897	2379	2624	2581	2459	2266	2860	3684	2223	2131	1618	1695	1594
ENSMUSG00000031278	Acsl4	4381	4261	4452	5404	8293	5003	5126	5769	5422	6691	6308	8253	6704	3407	3798	6347	6169	5735
ENSMUSG00000024981	Acsl5	6338	5714	6574	8596	13404	7639	6611	7454	8170	9448	8557	10240	11182	7328	5961	9884	10529	9817
ENSMUSG00000020333	Acsl6	3	1	3	3	4	0	1	4	4	7	14	16	4	3	2	7	2	8
ENSMUSG00000033533	Acsm1	15	12	28	15	27	10	14	21	15	23	17	16	40	16	12	29	26	19
ENSMUSG00000030945	Acsm2	0	0	0	0	0	0	0	0	1	0	0	0	1	0	0	1	0	1
ENSMUSG00000030935	Acsm3	14	15	20	11	27	16	10	13	15	8	15	15	14	20	11	9	17	24
ENSMUSG00000047026	Acsm4	0	0	0	0	0	0	0	0	0	0	0	0	0	1	0	0	0	0
ENSMUSG00000030972	Acsm5	6	3	4	6	7	9	2	6	6	6	5	4	9	10	11	9	10	12
ENSMUSG00000027452	Acss1	440	415	483	171	241	149	96	97	110	66	73	119	447	257	224	92	91	125
ENSMUSG00000027605	Acss2	470	454	528	588	848	542	471	550	514	923	813	935	626	440	380	399	469	375
ENSMUSG00000086529	Acss2os	0	0	0	1	0	0	0	0	0	0	0	0	0	2	0	0	0	0
ENSMUSG00000035948	Acss3	2	5	4	9	9	0	3	5	0	2	5	0	4	4	5	5	6	5
ENSMUSG00000031972	Acta1	6	4	1	7	13	16	7	5	7	2	1	5	14	24	4	4	0	1
ENSMUSG00000035783	Acta2	31	17	26	29	39	24	24	17	30	54	68	53	27	12	13	35	28	21
ENSMUSG00000029580	Actb	70839	67588	74696	90418	135722	81663	63439	72057	78702	87612	81331	92864	88617	63637	49833	80470	77114	74357
ENSMUSG00000055194	Actbl2	0	0	0	0	0	0	0	0	0	0	0	0	0	0	0	0	0	0
ENSMUSG00000068614	Actc1	1	0	0	0	0	0	1	1	2	0	0	1	2	1	0	0	0	1
ENSMUSG00000031085	Acte1	0	0	0	0	0	0	0	0	0	0	0	0	0	0	0	0	0	0
ENSMUSG00000062825	Actg1	30609	29692	32795	41139	63608	38212	21481	23478	26183	40086	36162	44029	32256	20717	17256	31098	33786	31072
ENSMUSG00000059430	Actg2	1	0	3	4	4	1	0	0	0	1	0	3	4	8	1	1	0	0
ENSMUSG00000078129	Actl10	6	10	5	4	5	10	3	11	10	2	11	6	15	2	9	4	2	6
ENSMUSG00000066368	Actl11	0	0	0	0	0	0	0	0	0	0	0	0	0	0	0	0	0	0
ENSMUSG00000027671	Actl6a	1456	1347	1514	1584	2282	1349	1212	1333	1548	985	947	1113	2054	1445	1172	1351	1446	1446
ENSMUSG00000029712	Actl6b	0	0	1	0	0	0	0	0	0	0	0	0	1	0	0	0	0	0
ENSMUSG00000070979	Actl7a	1	2	0	1	0	0	0	0	0	2	0	0	1	1	2	1	1	1
ENSMUSG00000070980	Actl7b	0	0	0	0	0	0	0	1	2	0	0	0	0	0	0	0	0	0
ENSMUSG00000092519	Actl9	1	1	0	1	0	1	1	0	0	0	0	0	2	0	0	1	0	0
ENSMUSG00000015143	Actn1	5255	5029	5506	5134	7874	4711	9243	10910	11635	8405	7577	9255	12554	8469	7107	7536	7432	6962
ENSMUSG00000052374	Actn2	0	1	1	0	1	1	0	0	2	0	1	0	0	1	1	1	0	0
ENSMUSG00000006457	Actn3	11	17	18	10	38	17	21	17	22	14	12	16	23	27	19	20	22	34
ENSMUSG00000054808	Actn4	14873	13798	15519	15686	24020	14781	11939	13568	14417	18014	15734	18850	24564	16682	13901	17170	17454	16690
ENSMUSG00000021076	Actr10	2335	2041	2432	2386	3441	1979	2081	2186	2570	2218	2086	2509	3524	2344	2025	2268	2343	2241
ENSMUSG00000025228	Actr1a	3636	3439	3828	3992	6093	3532	3407	3954	4143	3982	3681	4429	6138	4085	3418	4679	4744	4420
ENSMUSG00000037351	Actr1b	6201	5843	6651	5502	8879	5078	5895	6745	7203	5261	4764	5636	7829	5287	4363	5081	5407	5092
ENSMUSG00000020152	Actr2	17525	17346	18903	20090	31224	18319	15757	17446	18212	14876	13904	17514	25418	14510	14231	18950	18590	17346
ENSMUSG00000026341	Actr3	16202	15143	16974	21187	31943	19035	13653	14923	16163	14364	13883	16944	16915	10058	9479	13637	14424	13573
ENSMUSG00000056367	Actr3b	245	240	270	291	444	271	207	234	235	166	174	161	315	236	200	140	173	167
ENSMUSG00000037761	Actr5	971	854	1047	895	1339	743	839	930	1037	668	590	693	1551	1055	793	769	769	809
ENSMUSG00000019948	Actr6	584	493	589	468	767	441	502	516	545	384	436	467	858	538	489	444	516	474
ENSMUSG00000015971	Actr8	1142	1087	1209	1041	1721	1031	889	975	1068	747	731	900	1596	1086	919	857	1002	899
ENSMUSG00000046615	Actrt1	0	0	0	0	0	0	0	0	0	0	0	0	0	0	0	0	0	0
ENSMUSG00000051276	Actrt2	0	0	0	0	0	0	0	0	0	0	0	0	0	0	0	0	0	0
ENSMUSG00000037737	Actrt3	1	0	0	0	1	0	0	0	2	0	1	0	0	0	3	1	1	0
ENSMUSG00000026836	Acvr1	401	399	485	504	831	441	407	496	495	424	436	503	744	420	439	505	523	466
ENSMUSG00000000532	Acvr1b	673	613	696	693	1102	629	516	644	712	727	614	824	1042	678	583	808	773	738
ENSMUSG00000026834	Acvr1c	0	0	0	1	1	0	0	1	0	0	0	0	2	3	0	2	2	3
ENSMUSG00000052155	Acvr2a	335	324	334	308	494	284	269	312	322	190	191	200	508	222	299	328	312	264
ENSMUSG00000061393	Acvr2b	255	239	238	141	221	126	167	162	154	94	80	94	383	223	274	160	148	127
ENSMUSG00000000530	Acvrl1	79	85	101	246	344	186	42	68	76	235	262	226	130	65	52	79	111	82
ENSMUSG00000023262	Acy1	2906	2718	3061	2090	3217	1857	2636	2789	3283	1831	1671	1969	5004	3806	2913	2401	2564	2565
ENSMUSG00000024866	Acy3	56	57	68	50	95	42	45	37	52	46	40	55	140	101	59	68	81	70
ENSMUSG00000008822	Acyp1	269	245	247	215	274	192	241	268	304	291	236	340	467	262	250	225	230	213
ENSMUSG00000060923	Acyp2	34	27	44	27	51	33	40	41	46	26	30	57	85	57	56	34	34	39
ENSMUSG00000017697	Ada	369	333	418	588	845	496	423	492	596	641	583	636	769	577	485	801	845	885
ENSMUSG00000027719	Adad1	0	0	0	0	0	0	0	0	0	0	0	0	0	0	0	0	0	0
ENSMUSG00000024266	Adad2	0	1	2	1	4	1	6	3	2	6	3	2	2	3	2	4	1	3
ENSMUSG00000027259	Adal	278	254	285	241	408	220	252	317	291	188	134	195	517	272	281	309	305	257
ENSMUSG00000054693	Adam10	4468	4250	4781	3601	5357	3104	3811	4194	4172	2326	2243	3036	8695	4594	5258	4818	4764	4196
ENSMUSG00000020926	Adam11	10	7	13	13	17	16	3	2	3	6	5	4	15	8	2	4	7	2
ENSMUSG00000054555	Adam12	0	0	1	2	1	1	1	0	0	0	0	0	1	0	0	1	1	2
ENSMUSG00000028041	Adam15	4420	4197	4825	6136	9538	5724	4789	5513	6115	8186	7049	8609	9216	6360	5170	7159	7326	6703
ENSMUSG00000052593	Adam17	5209	5020	5426	6068	8793	5334	5336	5922	6080	5031	4827	6010	8539	4940	4652	6995	6893	6179
ENSMUSG00000031552	Adam18	4	4	1	3	8	0	11	8	9	2	7	4	11	4	4	1	3	10
ENSMUSG00000011256	Adam19	0	0	0	0	0	0	0	0	0	0	0	0	2	1	0	0	0	0
ENSMUSG00000072647	Adam1a	52	57	93	74	146	76	65	94	70	49	57	57	146	79	47	109	76	84
ENSMUSG00000062438	Adam1b	0	0	1	2	2	2	0	0	0	1	2	4	3	0	0	2	1	0
ENSMUSG00000022039	Adam2	0	0	0	0	0	0	0	0	0	0	0	0	0	0	0	0	0	0
ENSMUSG00000046282	Adam20	0	2	0	0	0	0	0	0	0	0	0	0	0	0	0	0	0	0
ENSMUSG00000008438	Adam21	4	3	2	6	5	0	2	2	1	0	0	4	3	1	2	1	0	5
ENSMUSG00000040537	Adam22	15	16	16	28	56	34	11	27	23	26	25	39	22	15	22	50	35	28
ENSMUSG00000025964	Adam23	1	2	1	1	0	0	0	1	1	3	0	0	1	2	3	1	1	0
ENSMUSG00000046723	Adam24	0	0	0	0	0	0	0	0	0	0	0	0	0	0	0	0	0	0
ENSMUSG00000071937	Adam25	0	0	0	0	0	0	0	0	0	0	0	0	0	0	0	0	0	0
ENSMUSG00000048516	Adam26a	0	0	0	0	0	0	0	0	0	0	0	0	0	0	0	0	0	0
ENSMUSG00000063900	Adam26b	0	0	0	0	0	0	0	0	0	0	0	0	0	0	0	0	0	0
ENSMUSG00000014725	Adam28	3	4	4	1	6	3	4	2	2	3	6	7	9	7	7	7	2	8
ENSMUSG00000046258	Adam29	0	0	0	0	0	0	0	0	0	0	0	0	0	0	0	0	0	0
ENSMUSG00000031553	Adam3	122	116	123	114	201	142	92	123	124	96	87	128	181	131	101	114	114	103
ENSMUSG00000043468	Adam30	0	0	0	0	0	0	0	0	0	0	0	1	0	0	0	0	0	0
ENSMUSG00000037437	Adam32	2	4	0	6	6	6	8	6	5	4	1	12	6	9	2	1	1	7
ENSMUSG00000027318	Adam33	11	7	10	43	66	38	7	5	9	30	32	57	15	9	14	9	21	17
ENSMUSG00000079058	Adam34	0	0	0	0	0	0	0	0	0	0	0	0	0	0	0	0	0	0
ENSMUSG00000050190	Adam34l	0	0	0	0	0	0	0	0	0	0	0	0	0	0	0	0	0	0
ENSMUSG00000054033	Adam39	0	0	0	0	0	0	0	0	0	0	0	0	0	0	0	0	0	0
ENSMUSG00000072972	Adam4	10	12	10	14	16	11	9	13	16	5	6	7	18	9	10	7	5	10
ENSMUSG00000031554	Adam5	0	0	0	0	0	0	0	0	0	0	0	0	0	0	0	0	0	0
ENSMUSG00000043945	Adam6a	0	0	0	0	0	0	0	0	0	0	0	0	0	0	0	0	0	0
ENSMUSG00000051804	Adam6b	0	0	0	0	0	0	0	0	0	0	0	0	0	0	0	0	0	0
ENSMUSG00000022056	Adam7	0	1	0	0	0	0	0	0	0	1	0	1	0	0	1	0	0	0
ENSMUSG00000025473	Adam8	3219	3084	3410	4149	6513	4111	8304	9469	10234	15498	13331	16022	4006	2638	2225	5572	5827	5351
ENSMUSG00000031555	Adam9	2076	2043	2251	2407	3894	2245	1788	1950	1878	2006	1875	2398	3073	1791	1822	3068	2946	2646
ENSMUSG00000022057	Adamdec1	0	1	0	3	0	1	2	0	1	1	2	5	0	1	3	2	2	0
ENSMUSG00000022893	Adamts1	38	34	39	31	49	29	43	62	36	61	57	64	65	32	34	53	55	46
ENSMUSG00000024299	Adamts10	1327	1163	1285	1029	1532	1013	1031	1239	1292	1009	916	1121	2041	1432	1181	984	1004	949
ENSMUSG00000047497	Adamts12	0	0	0	0	0	0	0	0	0	0	0	0	0	0	0	0	0	0
ENSMUSG00000014852	Adamts13	1	3	1	1	1	6	1	2	0	3	2	7	0	2	0	0	0	2
ENSMUSG00000059901	Adamts14	133	115	134	167	221	131	136	135	182	343	277	323	190	123	100	76	73	90
ENSMUSG00000033453	Adamts15	4	1	3	2	4	1	1	2	1	0	3	3	3	1	2	1	3	0
ENSMUSG00000049538	Adamts16	0	0	0	0	0	0	0	0	0	0	0	0	0	0	0	0	0	0
ENSMUSG00000058145	Adamts17	2	0	0	0	1	0	0	0	0	0	0	0	0	0	0	0	0	0
ENSMUSG00000053399	Adamts18	0	0	0	0	0	0	0	0	0	0	0	0	0	2	0	0	0	0
ENSMUSG00000053441	Adamts19	0	0	0	0	0	0	0	0	0	0	0	0	0	0	0	0	0	0
ENSMUSG00000036545	Adamts2	0	0	0	1	0	0	0	0	0	0	0	0	0	0	0	0	0	0
ENSMUSG00000022449	Adamts20	0	0	0	0	0	0	0	0	0	0	0	0	0	0	0	0	0	0
ENSMUSG00000043635	Adamts3	0	0	0	0	0	0	0	0	0	0	0	0	0	0	0	0	0	0
ENSMUSG00000006403	Adamts4	32	34	33	56	76	55	22	28	18	69	57	85	56	40	34	41	46	50
ENSMUSG00000022894	Adamts5	0	0	1	0	0	0	0	0	0	0	0	0	2	0	0	1	0	0
ENSMUSG00000046169	Adamts6	54	26	37	41	80	48	18	32	30	44	29	36	58	28	37	51	51	47
ENSMUSG00000032363	Adamts7	11	18	20	13	20	16	38	59	35	49	38	54	48	51	34	40	34	37
ENSMUSG00000031994	Adamts8	0	0	0	0	0	0	0	0	1	1	0	0	0	0	0	0	0	0
ENSMUSG00000030022	Adamts9	0	0	0	0	0	0	0	0	0	0	0	0	2	0	1	1	0	1
ENSMUSG00000066113	Adamtsl1	0	0	0	0	0	0	0	0	0	0	0	0	0	0	0	0	0	1
ENSMUSG00000036040	Adamtsl2	0	0	1	0	1	0	1	0	0	0	1	1	0	1	0	0	0	0
ENSMUSG00000070469	Adamtsl3	3	1	0	0	1	0	0	1	3	0	1	2	0	0	0	0	0	0
ENSMUSG00000015850	Adamtsl4	19	23	25	17	52	29	6	5	9	22	30	23	44	30	16	33	33	25
ENSMUSG00000043822	Adamtsl5	193	157	176	128	213	137	166	175	213	413	330	376	324	221	152	196	230	189
ENSMUSG00000056413	Adap1	2544	2071	2588	2412	3659	2041	2165	2209	2630	1671	1623	1951	4379	2861	2439	2771	3105	2814
ENSMUSG00000020709	Adap2	29	41	34	53	69	41	17	17	21	32	39	35	32	15	21	23	19	28
ENSMUSG00000027951	Adar	2220	2009	2233	3262	5040	3075	1582	1833	1889	2120	2005	2352	3481	2169	2025	4283	4563	3983
ENSMUSG00000020262	Adarb1	887	790	880	658	945	614	421	518	503	320	305	380	992	653	525	555	556	470
ENSMUSG00000052551	Adarb2	1	4	6	2	5	7	1	2	4	2	0	3	10	7	3	2	4	0
ENSMUSG00000031949	Adat1	537	534	591	483	702	375	373	458	499	280	237	286	774	514	470	363	408	325
ENSMUSG00000019808	Adat2	266	236	278	305	431	235	198	226	259	176	156	214	407	283	246	232	233	247
ENSMUSG00000113640	Adat3	283	181	298	217	249	170	191	218	269	174	158	179	425	308	223	264	295	285
ENSMUSG00000021044	Adck1	579	525	608	581	868	537	634	749	838	502	491	579	895	632	495	516	568	522
ENSMUSG00000046947	Adck2	261	277	325	309	439	271	224	294	252	281	256	324	425	306	247	215	240	209
ENSMUSG00000022550	Adck5	560	513	570	467	711	442	591	681	779	530	450	535	1156	840	611	524	582	508
ENSMUSG00000020431	Adcy1	0	0	0	0	0	0	0	0	0	0	0	1	0	0	0	0	0	0
ENSMUSG00000026567	Adcy10	1	1	0	0	1	2	1	6	3	2	0	2	1	0	1	0	1	0
ENSMUSG00000021536	Adcy2	17	13	13	3	13	2	86	97	118	71	63	80	15	17	15	5	5	5
ENSMUSG00000020654	Adcy3	13	15	19	12	14	15	27	29	39	19	14	21	30	16	14	18	18	6
ENSMUSG00000022220	Adcy4	0	0	1	3	3	3	2	0	1	2	0	2	0	0	0	0	1	2
ENSMUSG00000022840	Adcy5	1	2	9	2	8	5	3	2	6	1	5	4	10	4	2	3	3	2
ENSMUSG00000022994	Adcy6	565	539	556	510	698	404	315	378	381	415	286	424	1364	870	749	489	559	508
ENSMUSG00000031659	Adcy7	5699	5297	5791	4311	6418	3981	4634	5425	5348	4842	4186	5183	10610	6145	5952	4002	4083	3638
ENSMUSG00000022376	Adcy8	1	0	0	0	0	0	0	0	0	0	0	0	0	0	0	0	0	0
ENSMUSG00000005580	Adcy9	288	320	394	272	387	258	233	243	223	265	235	328	610	330	339	354	329	280
ENSMUSG00000024256	Adcyap1	0	0	0	0	1	0	0	0	0	0	0	0	0	0	0	0	0	0
ENSMUSG00000029778	Adcyap1r1	0	0	0	0	0	0	0	0	0	0	0	0	1	0	0	0	0	0
ENSMUSG00000029106	Add1	3548	3358	3774	3321	4608	2834	2877	3241	3509	3118	2649	3247	5127	3306	2811	2455	2726	2359
ENSMUSG00000030000	Add2	0	2	1	0	0	1	3	3	3	0	0	0	0	0	0	0	0	0
ENSMUSG00000025026	Add3	2175	2139	2239	1487	2144	1391	1281	1445	1559	964	873	1087	2503	1431	1401	1047	1123	1036
ENSMUSG00000050994	Adgb	40	44	66	81	118	80	37	29	36	24	28	30	62	32	42	27	32	35
ENSMUSG00000025475	Adgra1	0	0	0	0	0	0	0	0	0	0	0	0	0	0	0	0	0	0
ENSMUSG00000031486	Adgra2	43	54	49	31	39	37	14	28	28	15	19	24	27	18	7	27	24	29
ENSMUSG00000029090	Adgra3	1	1	1	1	1	2	2	5	0	0	4	3	3	3	0	3	4	4
ENSMUSG00000034730	Adgrb1	0	0	0	0	0	0	0	0	0	0	0	0	0	0	0	0	0	0
ENSMUSG00000028782	Adgrb2	30	17	21	10	16	11	7	8	0	5	3	8	17	10	7	7	2	3
ENSMUSG00000033569	Adgrb3	1	5	0	5	10	1	4	1	2	1	3	1	7	2	2	0	0	2
ENSMUSG00000044017	Adgrd1	0	0	0	0	0	0	0	0	0	0	0	0	0	0	0	0	0	0
ENSMUSG00000004730	Adgre1	411	329	391	584	744	426	665	673	774	687	640	786	451	233	255	594	703	534
ENSMUSG00000032915	Adgre4	1	1	5	4	15	5	6	6	8	3	1	2	10	8	8	6	5	2
ENSMUSG00000002885	Adgre5	44	54	46	27	25	26	18	15	21	16	10	12	81	54	36	46	32	29
ENSMUSG00000041293	Adgrf1	0	0	0	0	0	0	0	0	0	0	0	0	0	0	0	0	0	0
ENSMUSG00000057899	Adgrf2	0	0	0	1	3	0	3	0	0	0	0	2	0	0	1	0	0	0
ENSMUSG00000067642	Adgrf3	1	0	2	13	12	12	1	1	1	11	5	10	5	0	5	38	45	56
ENSMUSG00000023918	Adgrf4	0	0	0	1	3	0	0	2	1	0	1	1	0	1	0	0	0	0
ENSMUSG00000056492	Adgrf5	3	1	0	0	2	0	1	3	0	1	0	2	5	3	2	2	3	1
ENSMUSG00000031785	Adgrg1	97	111	122	68	105	73	117	121	181	153	113	136	280	190	156	61	52	70
ENSMUSG00000031298	Adgrg2	0	1	0	0	0	1	0	0	1	0	1	0	0	0	2	1	0	1
ENSMUSG00000060470	Adgrg3	0	2	0	1	0	0	5	1	2	1	2	2	0	4	1	0	1	2
ENSMUSG00000053852	Adgrg4	0	0	0	0	0	0	0	0	0	0	0	0	0	0	0	0	0	0
ENSMUSG00000061577	Adgrg5	0	0	2	3	1	2	0	2	0	0	0	0	1	0	0	0	0	0
ENSMUSG00000039116	Adgrg6	14	19	13	27	56	31	6	18	14	38	43	26	38	27	25	44	41	35
ENSMUSG00000022755	Adgrg7	0	0	0	0	0	0	0	0	0	0	0	0	0	0	0	0	0	0
ENSMUSG00000013033	Adgrl1	2369	2022	2190	1738	2572	1544	1072	1415	1402	1146	1093	1258	3437	2364	2047	1529	1596	1475
ENSMUSG00000028184	Adgrl2	3500	3418	3716	3370	5403	3325	2705	3217	3126	3182	2883	3735	5723	3470	3301	5118	4997	4278
ENSMUSG00000037605	Adgrl3	0	0	0	4	1	7	0	0	1	1	0	3	5	2	2	2	2	0
ENSMUSG00000039167	Adgrl4	2	0	1	0	3	4	2	6	0	0	0	4	5	1	1	1	2	0
ENSMUSG00000069170	Adgrv1	5	3	2	1	3	1	2	0	0	1	5	5	2	3	4	2	1	3
ENSMUSG00000074207	Adh1	114	113	124	135	182	140	98	150	137	146	166	171	204	157	86	236	213	210
ENSMUSG00000037797	Adh4	3	5	11	6	14	2	6	7	8	13	8	13	21	12	6	13	17	13
ENSMUSG00000028138	Adh5	6632	6004	7052	6399	9554	5456	4942	5259	5972	3775	3574	4431	10672	7388	6005	5542	6002	5811
ENSMUSG00000090306	Adh6-ps1	0	3	3	3	3	3	5	4	1	1	2	4	0	4	2	3	4	1
ENSMUSG00000053054	Adh6a	0	0	0	0	0	0	0	0	0	0	0	0	0	0	0	0	0	0
ENSMUSG00000074206	Adh6b	0	0	0	0	0	0	0	0	0	0	0	1	0	0	0	0	0	0
ENSMUSG00000055301	Adh7	3	6	5	8	10	10	1	2	1	8	1	6	4	0	1	2	3	1
ENSMUSG00000025911	Adhfe1	297	261	272	321	472	309	329	443	475	394	337	433	471	314	278	496	504	486
ENSMUSG00000020629	Adi1	2532	2284	2539	2115	3209	1931	1988	2132	2427	1325	1273	1445	4665	3313	2610	1960	2065	1950
ENSMUSG00000044405	Adig	0	0	1	0	0	0	0	0	0	0	0	0	0	0	0	1	0	0
ENSMUSG00000022878	Adipoq	0	0	0	0	0	0	0	0	0	0	0	0	0	0	0	0	0	2
ENSMUSG00000026457	Adipor1	6607	5958	6778	6046	9211	5357	6088	7118	7645	7601	6849	8134	9443	6250	5253	5302	5447	5259
ENSMUSG00000030168	Adipor2	3719	3364	3873	3478	5222	3092	3104	3533	3681	3442	3338	4015	5786	3687	3342	3235	3425	3195
ENSMUSG00000039197	Adk	2128	1913	2152	1717	2508	1494	1531	1819	1879	1214	1107	1387	2860	1837	1571	1502	1704	1619
ENSMUSG00000030790	Adm	497	513	491	138	161	121	41	33	34	74	66	92	106	37	34	29	55	16
ENSMUSG00000054136	Adm2	0	0	0	0	0	0	0	0	0	0	0	0	0	0	0	0	0	0
ENSMUSG00000051149	Adnp	1731	1539	1724	1644	2382	1385	1432	1537	1302	781	965	1360	2364	1262	1471	1308	1388	1076
ENSMUSG00000053950	Adnp2	1592	1524	1662	1703	2486	1498	1345	1545	1548	1368	1250	1448	2394	1495	1381	1606	1548	1471
ENSMUSG00000057134	Ado	2179	1934	2135	2454	3592	2227	1569	1886	1926	1667	1540	1915	2828	1773	1543	2228	2267	2059
ENSMUSG00000042429	Adora1	4	2	4	3	6	2	3	6	4	2	3	2	18	10	12	4	0	1
ENSMUSG00000020178	Adora2a	2	7	4	2	2	7	1	0	2	1	2	2	1	5	0	0	1	2
ENSMUSG00000018500	Adora2b	46	29	47	37	53	28	28	24	41	15	15	17	30	23	17	55	69	63
ENSMUSG00000000562	Adora3	3	1	2	4	6	4	11	8	12	8	16	13	9	18	10	11	14	15
ENSMUSG00000025236	Adpgk	1481	1417	1614	1860	2924	1671	1487	1794	1869	1519	1377	1718	2862	1735	1564	1819	1803	1576
ENSMUSG00000002844	Adprh	2070	2030	2282	2579	3811	2284	1882	2109	2359	2106	1965	2292	2822	2021	1541	1893	2118	2044
ENSMUSG00000031448	Adprhl1	24	13	14	5	16	9	8	10	7	22	20	16	17	8	13	5	7	6
ENSMUSG00000042558	Adprhl2	1180	1065	1188	1167	1721	1051	1002	1040	1273	879	735	935	1778	1320	1062	1009	1187	1139
ENSMUSG00000020910	Adprm	356	347	386	428	609	350	354	435	425	432	357	492	652	405	350	360	395	350
ENSMUSG00000045875	Adra1a	86	76	84	55	69	26	152	222	205	35	43	54	68	46	38	46	36	33
ENSMUSG00000050541	Adra1b	3	2	4	4	2	1	2	3	2	3	4	3	4	6	3	2	8	1
ENSMUSG00000027335	Adra1d	1	0	0	0	0	0	0	0	0	0	0	0	0	1	0	0	1	0
ENSMUSG00000033717	Adra2a	3	0	0	2	3	2	0	0	0	0	0	0	0	1	1	0	0	0
ENSMUSG00000058620	Adra2b	0	1	1	1	1	0	0	3	0	0	1	1	3	2	1	0	1	0
ENSMUSG00000045318	Adra2c	0	0	0	0	0	0	0	0	0	0	0	0	0	0	1	0	0	0
ENSMUSG00000035283	Adrb1	30	33	29	24	36	15	29	24	43	24	13	18	56	28	37	12	7	11
ENSMUSG00000045730	Adrb2	337	346	351	275	393	247	351	355	351	255	214	254	527	329	292	229	208	204
ENSMUSG00000031489	Adrb3	1	0	0	1	0	0	0	0	0	0	0	0	0	1	0	1	0	0
ENSMUSG00000039041	Adrm1	4455	3974	4662	4908	7789	4384	3506	4131	4481	3452	3312	3774	6395	4635	3616	4589	4703	4898
ENSMUSG00000022407	Adsl	3795	3587	4130	3796	5910	3244	3849	4391	4856	2901	2666	3250	6514	4586	3789	3940	4130	3940
ENSMUSG00000015961	Adss	6265	6055	6950	5732	8847	5202	6256	6976	7366	4322	3976	5104	9273	5592	5098	5003	5067	4903
ENSMUSG00000011148	Adssl1	731	713	791	354	477	305	876	933	1057	575	540	651	1063	780	589	373	407	363
ENSMUSG00000058022	Adtrp	14	10	9	5	24	9	11	14	14	10	10	20	29	12	7	20	19	18
ENSMUSG00000020473	Aebp1	3	2	3	4	1	5	1	2	2	0	2	2	5	7	3	5	0	2
ENSMUSG00000030232	Aebp2	3629	3241	3670	3654	5366	3155	3228	3688	3636	2948	2836	3479	5418	3132	3135	3304	3204	2933
ENSMUSG00000030609	Aen	1553	1411	1567	1867	2982	1707	1929	2192	2446	1628	1590	1894	3144	2326	1716	2630	2456	2479
ENSMUSG00000095071	AF067061	0	0	0	0	0	0	0	0	0	0	0	0	0	0	0	0	0	0
ENSMUSG00000094237	AF067063	0	0	0	0	0	0	0	0	0	0	0	0	0	0	0	0	0	0
ENSMUSG00000064621	AF357355	0	0	0	0	0	0	0	0	0	0	0	0	0	0	0	0	0	0
ENSMUSG00000088294	AF357425	0	0	0	0	0	0	0	0	0	0	0	0	0	0	0	0	0	0
ENSMUSG00000057116	AF366264	0	0	0	4	1	0	0	1	0	0	0	0	0	0	0	0	0	1
ENSMUSG00000029094	Afap1	35	17	16	19	42	16	31	18	18	17	34	27	30	18	20	26	25	20
ENSMUSG00000033032	Afap1l1	121	147	144	103	182	108	117	162	162	122	95	130	196	99	91	69	70	64
ENSMUSG00000025083	Afap1l2	0	0	0	0	3	1	0	0	0	0	0	0	0	0	0	0	0	0
ENSMUSG00000068036	Afdn	3525	3396	3670	3866	5924	3467	2762	3220	2911	3025	2739	3384	3779	2210	2104	2204	2163	2013
ENSMUSG00000029313	Aff1	2922	2704	2960	3232	4691	2868	3057	3787	3295	3355	2971	3952	5434	2950	3044	3905	3737	3221
ENSMUSG00000031189	Aff2	0	0	0	0	2	1	0	0	0	0	0	0	0	0	0	1	0	0
ENSMUSG00000037138	Aff3	0	0	0	0	0	0	0	0	0	0	0	0	0	0	0	0	0	0
ENSMUSG00000049470	Aff4	4487	4187	4403	3521	5267	3312	2811	3308	2734	2440	2453	3290	5700	3040	3400	3423	3469	2871
ENSMUSG00000038302	Afg1l	255	221	285	232	383	243	226	331	341	274	291	345	417	303	259	303	274	240
ENSMUSG00000031967	Afg3l1	3819	3400	3697	4136	6075	3674	3103	3543	3934	2905	2715	3149	4935	3292	2657	2902	3065	2931
ENSMUSG00000024527	Afg3l2	4975	4769	5122	4122	6424	3859	4806	5299	5847	4861	4419	5297	7854	4851	4451	4520	4735	4177
ENSMUSG00000029369	Afm	8	12	16	19	9	14	9	13	16	6	19	9	18	12	6	32	27	17
ENSMUSG00000017718	Afmid	54	77	102	125	187	95	123	107	124	139	129	160	155	72	94	102	83	69
ENSMUSG00000054932	Afp	1233	1151	1345	1086	1663	967	1824	1930	2116	1886	1684	2003	2639	2050	1404	1617	1803	1923
ENSMUSG00000049659	Aftph	1868	1774	1853	1970	2977	1754	1594	1837	1881	1464	1281	1848	2942	1848	1694	1668	1708	1660
ENSMUSG00000031521	Aga	597	569	668	687	1004	589	893	1005	1099	1027	875	1099	1434	921	773	920	956	938
ENSMUSG00000055013	Agap1	2699	2626	2697	2649	3860	2221	3381	3809	3725	2907	2696	3286	3513	2140	1954	2442	2401	2034
ENSMUSG00000025422	Agap2	7	9	3	12	5	8	3	1	1	0	4	0	5	3	0	3	0	1
ENSMUSG00000023353	Agap3	3130	2772	3150	2941	4532	2618	2925	3129	3536	3143	2981	3375	5080	3588	2807	2680	2911	2921
ENSMUSG00000025754	Agbl1	0	0	0	0	0	0	0	0	0	0	0	0	0	0	0	0	0	0
ENSMUSG00000040812	Agbl2	4	9	7	10	9	6	6	12	10	8	8	10	20	6	12	9	11	4
ENSMUSG00000038836	Agbl3	125	137	140	102	135	88	132	158	105	105	97	143	213	143	152	96	114	119
ENSMUSG00000061298	Agbl4	0	0	0	0	0	0	0	0	0	0	0	0	1	0	0	0	0	0
ENSMUSG00000029165	Agbl5	225	221	226	178	288	156	109	154	151	165	136	166	275	201	163	102	114	120
ENSMUSG00000015452	Ager	16	7	12	11	27	20	6	4	13	18	7	13	24	15	6	19	19	15
ENSMUSG00000026159	Agfg1	5731	5276	5729	7299	10764	6417	4674	5375	5310	6456	6253	7572	6102	3770	3453	5455	5555	4945
ENSMUSG00000029722	Agfg2	1487	1330	1490	1368	2039	1166	1539	1598	1765	1619	1506	1955	2813	1975	1541	1691	1718	1743
ENSMUSG00000021681	Aggf1	3632	3323	3871	3432	5246	3079	2820	3331	3356	2308	1973	2579	4808	2929	2632	2991	2984	2769
ENSMUSG00000029916	Agk	1079	1003	1061	1004	1522	860	937	1040	1186	750	681	822	1559	935	840	896	921	921
ENSMUSG00000033400	Agl	2613	2413	2681	2058	3098	1973	1671	2017	1849	1737	1650	1911	4224	2415	2455	1945	1974	1796
ENSMUSG00000040706	Agmat	6	7	8	1	18	11	6	12	15	6	6	10	15	12	8	14	17	11
ENSMUSG00000050103	Agmo	29	26	23	20	31	20	6	14	14	10	25	35	25	19	18	13	14	12
ENSMUSG00000041530	Ago1	2010	1890	1939	1653	2506	1437	1365	1652	1613	1108	1108	1284	2949	1755	1647	1455	1503	1231
ENSMUSG00000036698	Ago2	8670	8390	8710	7449	11341	6895	5219	6354	5110	6087	5588	7490	11200	5671	6798	6671	6259	5196
ENSMUSG00000028842	Ago3	1030	894	923	859	1307	766	723	869	663	542	491	656	1414	687	823	859	781	648
ENSMUSG00000042500	Ago4	274	249	285	215	325	169	199	217	216	187	160	190	404	194	220	141	172	153
ENSMUSG00000034254	Agpat1	2211	2112	2392	2263	3408	2117	2278	2602	2929	3099	2773	3294	3719	2674	2026	2404	2420	2391
ENSMUSG00000026922	Agpat2	737	758	816	799	1240	678	809	828	984	703	645	719	1323	1056	783	727	843	742
ENSMUSG00000001211	Agpat3	2319	2078	2355	2358	3448	2069	1696	1830	1999	1936	1737	2117	4132	2789	2347	2155	2312	2217
ENSMUSG00000023827	Agpat4	691	682	737	869	1433	813	985	1057	1178	1939	1695	1980	1274	874	687	1230	1304	1317
ENSMUSG00000031467	Agpat5	4096	3759	4386	3746	5706	3302	4193	4701	5073	3193	3095	3676	6038	4050	3331	4220	4335	4211
ENSMUSG00000042410	Agps	6753	6813	7047	5825	9266	5404	5362	5979	5639	4025	4067	5104	9704	5158	5514	6775	6452	5857
ENSMUSG00000020581	Agr2	6	0	9	0	1	0	5	2	9	0	5	0	0	0	9	1	7	0
ENSMUSG00000036231	Agr3	0	1	0	0	0	0	0	0	1	0	0	0	0	0	0	0	0	0
ENSMUSG00000041936	Agrn	896	826	930	1135	1697	994	580	682	704	889	835	980	1813	1119	1005	1487	1533	1357
ENSMUSG00000005705	Agrp	0	0	1	0	5	0	0	2	0	1	2	1	2	1	0	1	0	2
ENSMUSG00000031980	Agt	28	36	38	40	48	30	28	33	30	35	58	45	60	63	31	64	56	53
ENSMUSG00000021557	Agtpbp1	1605	1511	1667	1895	2853	1632	1348	1541	1536	1404	1418	1762	2460	1331	1348	1790	1804	1651
ENSMUSG00000049115	Agtr1a	1	2	4	2	0	3	2	5	2	2	2	5	6	5	4	9	3	2
ENSMUSG00000054988	Agtr1b	1	0	0	0	0	0	0	0	0	0	0	0	0	0	0	0	0	0
ENSMUSG00000068122	Agtr2	0	0	0	0	0	0	0	0	0	0	0	0	0	0	0	0	0	0
ENSMUSG00000029007	Agtrap	641	625	711	915	1322	790	657	689	761	1004	875	1186	1434	901	758	1122	1140	1146
ENSMUSG00000026272	Agxt	13	7	18	16	17	15	3	9	18	9	13	26	23	14	13	20	16	20
[truncated: 53,472 more rows]

## Sheet: DESEQ2 Untreated GSK3b v NTC
id	baseMean	log2FoldChange	lfcSE	stat	pvalue	padj	symbol
ENSMUSG00000000861	13.5462	-3.66831	0.584888	-4.56209	5.06e-06	0.000527523	Bcl11a
ENSMUSG00000001025	7956.34	1.44623	0.0635255	7.02447	2.15e-12	3.69e-10	S100a6
ENSMUSG00000001128	3964.03	1.17881	0.0462079	3.86962	0.000109004	0.00912011	Cfp
ENSMUSG00000001270	17209.8	1.42463	0.0580263	7.3179	2.52e-13	4.76e-11	Ckb
ENSMUSG00000001510	4.87055	-6.85145	1.42362	-4.11025	3.95e-05	0.00355451	Dlx3
ENSMUSG00000001588	386.142	-2.08296	0.129518	-8.36152	6.19e-17	1.54e-14	Acap1
ENSMUSG00000001622	484.572	1.73134	0.111703	6.5472	5.86e-11	9.07e-09	Csn3
ENSMUSG00000002250	1060.4	-1.33434	0.0803229	-4.16242	3.15e-05	0.00290883	Ppard
ENSMUSG00000002489	697.542	2.02541	0.110768	9.25727	2.1e-20	5.95e-18	Tiam1
ENSMUSG00000002602	457.084	-2.19973	0.18015	-6.65964	2.75e-11	4.38e-09	Axl
ENSMUSG00000002944	5543.22	1.52552	0.05231	10.0463	9.54e-24	3.48e-21	Cd36
ENSMUSG00000002985	8684.01	-1.97496	0.0605122	-16.1119	2.11e-58	2.05e-55	Apoe
ENSMUSG00000003153	547.977	-2.7433	0.18244	-9.55545	1.23e-21	3.93e-19	Slc2a3
ENSMUSG00000003949	112.632	3.29721	0.323231	7.10704	1.19e-12	2.12e-10	Hlf
ENSMUSG00000004698	126.67	-2.80227	0.326922	-5.51284	3.53e-08	4.45e-06	Hdac9
ENSMUSG00000005125	1797.77	-2.22676	0.139983	-8.76361	1.89e-18	5.01e-16	Ndrg1
ENSMUSG00000005237	11.0774	4.14153	0.791381	3.96968	7.2e-05	0.0062522	Dnah2
ENSMUSG00000005640	118.447	-1.84097	0.219305	-3.83469	0.000125722	0.0104334	Insrr
ENSMUSG00000006221	103.084	-3.6597	0.217315	-12.2389	1.93e-34	1.03e-31	Hspb7
ENSMUSG00000006362	23.3734	-2.62048	0.477628	-3.39277	0.000691899	0.0497364	Cbfa2t3
ENSMUSG00000006800	2487.44	1.84296	0.0577315	14.6013	2.75e-48	2.16e-45	Sulf2
ENSMUSG00000006930	123.884	-1.76943	0.193524	-3.97589	7.01e-05	0.00614343	Hap1
ENSMUSG00000010122	1082.52	-1.5188	0.083118	-6.24177	4.33e-10	6.35e-08	Slc47a1
ENSMUSG00000013367	37.135	2.34031	0.289978	4.6221	3.8e-06	0.00040392	Iglon5
ENSMUSG00000013846	2148.06	1.59531	0.0591841	10.0587	8.41e-24	3.12e-21	St3gal1
ENSMUSG00000015396	649.219	-1.5754	0.0844314	-6.81501	9.43e-12	1.55e-09	Cd83
ENSMUSG00000015652	778.727	1.36051	0.0941314	3.82984	0.000128229	0.0105983	Steap1
ENSMUSG00000016283	274.954	3.01375	0.158287	12.7221	4.46e-37	2.53e-34	H2-M2
ENSMUSG00000017314	53.705	-2.25571	0.349663	-3.59119	0.000329176	0.025455	Mpp2
ENSMUSG00000017400	4.87557	-5.90588	1.35674	-3.61593	0.000299276	0.0232308	Stac2
ENSMUSG00000018334	64.8023	-2.14306	0.300484	-3.80408	0.000142334	0.0116697	Ksr1
ENSMUSG00000018476	742.781	-1.60541	0.0922218	-6.5647	5.21e-11	8.12e-09	Kdm6b
ENSMUSG00000018920	290.265	1.71556	0.149574	4.78398	1.72e-06	0.00019068	Cxcl16
ENSMUSG00000018930	3020.04	2.34008	0.0675556	19.8367	1.43e-87	2.66e-84	Ccl4
ENSMUSG00000019558	3178.34	1.67831	0.041242	16.4471	8.79e-61	9.97e-58	Slc6a8
ENSMUSG00000019866	716.327	1.44069	0.0904009	4.87479	1.09e-06	0.000123539	Crybg1
ENSMUSG00000020034	535.518	-1.5983	0.0852528	-7.01798	2.25e-12	3.83e-10	Tcp11l2
ENSMUSG00000020108	1627.21	-2.03077	0.0720417	-14.308	1.95e-46	1.37e-43	Ddit4
ENSMUSG00000020142	494.754	-1.65215	0.094985	-6.86578	6.61e-12	1.1e-09	Slc1a4
ENSMUSG00000020303	714.484	-1.57447	0.0982514	-5.84693	5.01e-09	6.64e-07	Stc2
ENSMUSG00000020326	7366.99	1.69355	0.0400602	17.3128	3.77e-67	4.81e-64	Ccng1
ENSMUSG00000020399	208.204	2.17917	0.147212	8.01005	1.15e-15	2.57e-13	Havcr2
ENSMUSG00000020435	397.935	1.72627	0.172576	4.20839	2.57e-05	0.00241968	Osbp2
ENSMUSG00000020635	231.256	1.6731	0.16505	4.07816	4.54e-05	0.00406454	Fkbp1b
ENSMUSG00000020644	1369.49	1.47809	0.062461	7.65425	1.94e-14	3.97e-12	Id2
ENSMUSG00000020785	125.842	-2.17747	0.180261	-6.53201	6.49e-11	9.96e-09	Camkk1
ENSMUSG00000020838	26.805	2.93007	0.404312	4.77371	1.81e-06	0.000197452	Slc6a4
ENSMUSG00000020902	434.029	2.01169	0.176174	5.7426	9.32e-09	1.2e-06	Ntn1
ENSMUSG00000021062	5679.35	1.38469	0.0380848	10.1008	5.48e-24	2.07e-21	Rab15
ENSMUSG00000021185	1383.09	1.45695	0.0615315	7.42628	1.12e-13	2.21e-11	Dglucy
ENSMUSG00000021250	267.742	1.80496	0.121451	6.62788	3.41e-11	5.39e-09	Fos
ENSMUSG00000021262	218.007	-3.48717	0.528037	-4.71021	2.47e-06	0.000267299	Evl
ENSMUSG00000021365	45.6891	-4.22561	0.462705	-6.97119	3.14e-12	5.26e-10	Nedd9
ENSMUSG00000021403	29.9673	2.701	0.448778	3.79028	0.000150477	0.012239	Serpinb9b
ENSMUSG00000021536	37.7455	2.89496	0.319573	5.92967	3.04e-09	4.19e-07	Adcy2
ENSMUSG00000022090	906.653	1.22331	0.0635338	3.51489	0.000439944	0.0326599	Pdlim2
ENSMUSG00000022126	21611.5	2.39879	0.0535043	26.1434	1.17e-150	5.97e-147	Acod1
ENSMUSG00000022479	22.6095	-4.26513	0.916367	-3.56312	0.000366474	0.0276072	Vdr
ENSMUSG00000022494	66.5031	2.03834	0.272799	3.80625	0.000141087	0.0116141	Shisa9
ENSMUSG00000022887	268.494	4.71389	0.207108	17.9321	6.62e-72	9.66e-69	Masp1
ENSMUSG00000023067	6847.89	1.45158	0.0485588	9.29963	1.41e-20	4.11e-18	Cdkn1a
ENSMUSG00000023232	32.1598	2.23839	0.296063	4.18286	2.88e-05	0.0026759	Serinc2
ENSMUSG00000023349	95.7114	2.42747	0.274332	5.20346	1.96e-07	2.34e-05	Clec4n
ENSMUSG00000023951	2781.44	-1.37457	0.0936336	-4.00035	6.32e-05	0.00558972	Vegfa
ENSMUSG00000024610	14167.6	2.04566	0.0568345	18.3983	1.35e-75	2.13e-72	Cd74
ENSMUSG00000024672	110.72	1.7657	0.196869	3.88941	0.00010049	0.00847725	Ms4a7
ENSMUSG00000024679	1193.39	1.62707	0.0667076	9.40031	5.44e-21	1.63e-18	Ms4a6d
ENSMUSG00000024736	731.586	1.42021	0.0783851	5.36087	8.28e-08	1.02e-05	Tmem132a
ENSMUSG00000024770	66.0944	2.05719	0.262593	4.02597	5.67e-05	0.00503633	Lipn
ENSMUSG00000024778	361.632	1.54836	0.125565	4.36713	1.26e-05	0.00124757	Fas
ENSMUSG00000025044	1330.47	2.05201	0.161924	6.49691	8.2e-11	1.24e-08	Msr1
ENSMUSG00000025141	21.9899	-2.86637	0.50578	-3.69008	0.000224186	0.0178084	Myadml2
ENSMUSG00000025432	39.9417	4.31399	0.556158	5.95872	2.54e-09	3.55e-07	Avil
ENSMUSG00000025473	7146.54	1.60949	0.0454646	13.4058	5.59e-41	3.68e-38	Adam8
ENSMUSG00000025494	36.0118	-3.16142	0.408508	-5.29102	1.22e-07	1.47e-05	Sigirr
ENSMUSG00000025856	934.718	1.33444	0.0794679	4.20854	2.57e-05	0.00241968	Pdgfa
ENSMUSG00000026170	287.702	-1.53573	0.129992	-4.12124	3.77e-05	0.00341922	Cyp27a1
ENSMUSG00000026315	326.325	1.92763	0.200297	4.63127	3.63e-06	0.000388446	Serpinb8
ENSMUSG00000026390	324.068	3.71529	0.134393	20.2041	9.01e-91	2.04e-87	Marco
ENSMUSG00000026825	66.8645	2.08724	0.277528	3.91758	8.94e-05	0.00760814	Dnm1
ENSMUSG00000026875	38.2936	2.87009	0.421893	4.43261	9.31e-06	0.000936276	Traf1
ENSMUSG00000026981	5550.51	2.32032	0.0612268	21.5644	3.88e-103	1.32e-99	Il1rn
ENSMUSG00000027074	10.7536	4.95141	1.06042	3.72628	0.000194327	0.0156188	Slc43a3
ENSMUSG00000027111	498.216	-2.00263	0.107161	-9.35629	8.26e-21	2.44e-18	Itga6
ENSMUSG00000027313	104.408	-3.05484	0.286894	-7.16237	7.93e-13	1.43e-10	Chac1
ENSMUSG00000027350	31.3005	-3.9021	0.43885	-6.61297	3.77e-11	5.92e-09	Chgb
ENSMUSG00000027435	122.987	-2.72911	0.20116	-8.59568	8.28e-18	2.14e-15	Cd93
ENSMUSG00000027452	197.106	-2.06494	0.151325	-7.03745	1.96e-12	3.39e-10	Acss1
ENSMUSG00000027562	331.106	1.90478	0.15381	5.88247	4.04e-09	5.54e-07	Car2
ENSMUSG00000027624	3189.16	1.67512	0.0763514	8.84228	9.38e-19	2.52e-16	Epb41l1
ENSMUSG00000027646	2623.45	2.36469	0.0677446	20.1446	3e-90	6.13e-87	Src
ENSMUSG00000027765	105.051	-1.66555	0.186758	-3.56373	0.000365617	0.0276072	P2ry1
ENSMUSG00000027800	1404.91	3.41052	0.151277	15.9345	3.65e-57	3.39e-54	Tm4sf1
ENSMUSG00000027843	293.659	1.45008	0.127765	3.52271	0.000427157	0.0319429	Ptpn22
ENSMUSG00000027848	49.9263	2.88995	0.258237	7.31865	2.5e-13	4.76e-11	Olfml3
ENSMUSG00000028064	1326.2	-1.38695	0.0862562	-4.48606	7.26e-06	0.000748065	Sema4a
ENSMUSG00000028459	4378.03	1.3981	0.0521865	7.62849	2.38e-14	4.8e-12	Cd72
ENSMUSG00000028583	777.472	2.73152	0.145444	11.905	1.11e-32	5.83e-30	Pdpn
ENSMUSG00000028654	54.7272	2.50067	0.314245	4.77547	1.79e-06	0.000196787	Mycl
ENSMUSG00000028664	138.664	-1.84461	0.236711	-3.56812	0.000359546	0.0272868	Ephb2
ENSMUSG00000028755	194.402	1.59837	0.144963	4.12775	3.66e-05	0.00333875	Cda
ENSMUSG00000028773	32.5662	-2.44663	0.363993	-3.97434	7.06e-05	0.00615725	Fabp3
ENSMUSG00000028780	693.281	3.2405	0.110273	20.3177	8.97e-92	2.29e-88	Sema3c
ENSMUSG00000028834	360.803	-2.69675	0.122749	-13.8229	1.85e-43	1.26e-40	Trim63
ENSMUSG00000029084	859.374	-1.38239	0.0894159	-4.27648	1.9e-05	0.00182841	Cd38
ENSMUSG00000029304	135168	1.65629	0.0491987	13.3395	1.36e-40	8.7e-38	Spp1
ENSMUSG00000029372	12.8939	3.01123	0.5623	3.5768	0.000347823	0.0264956	Ppbp
ENSMUSG00000029385	384.725	-1.5382	0.135819	-3.96259	7.41e-05	0.00641349	Ccng2
ENSMUSG00000029608	30.691	3.01192	0.436692	4.60718	4.08e-06	0.000431741	Rph3a
ENSMUSG00000029765	589.421	3.02032	0.131959	15.3102	6.53e-53	5.34e-50	Plxna4
ENSMUSG00000029781	155.284	-1.98668	0.137152	-7.19406	6.29e-13	1.15e-10	Fkbp9
ENSMUSG00000029915	4893.43	1.35145	0.0427768	8.21593	2.11e-16	5.06e-14	Clec5a
ENSMUSG00000030109	5194.34	1.96301	0.0572403	16.824	1.63e-63	1.96e-60	Slc6a12
ENSMUSG00000030142	7193.67	1.27433	0.0424982	6.4551	1.08e-10	1.61e-08	Clec4e
ENSMUSG00000030144	4253.68	1.85353	0.0588943	14.4926	1.35e-47	9.84e-45	Clec4d
ENSMUSG00000030148	36.0715	2.59289	0.462171	3.44654	0.000567823	0.041253	Clec4a2
ENSMUSG00000030187	154.752	2.69685	0.435328	3.89787	9.7e-05	0.00822044	Klra2
ENSMUSG00000030329	797.659	-3.01112	0.155212	-12.9572	2.14e-38	1.26e-35	Pianp
ENSMUSG00000030409	283.248	1.72822	0.17685	4.11771	3.83e-05	0.00345664	Dmpk
ENSMUSG00000030789	1044.47	-2.13234	0.0897483	-12.6169	1.7e-36	9.41e-34	Itgax
ENSMUSG00000030790	139.915	-3.72694	0.277475	-9.82768	8.56e-23	2.82e-20	Adm
ENSMUSG00000030798	2105.75	1.24038	0.0641602	3.74651	0.000179311	0.0144689	Cd37
ENSMUSG00000031304	998.313	-1.42567	0.0955033	-4.45717	8.3e-06	0.000839332	Il2rg
ENSMUSG00000031451	5035.37	1.19222	0.0428989	4.48083	7.44e-06	0.00076278	Gas6
ENSMUSG00000031465	598.991	1.32613	0.0746261	4.37016	1.24e-05	0.00123642	Angpt2
ENSMUSG00000031520	40.0943	3.21391	0.312594	7.08238	1.42e-12	2.49e-10	Vegfc
ENSMUSG00000031700	943.889	-1.34735	0.0720746	-4.81934	1.44e-06	0.000161567	Gpt2
ENSMUSG00000031770	1544.81	-1.18329	0.05032	-3.64244	0.000270071	0.0211245	Herpud1
ENSMUSG00000032089	207.839	-1.86914	0.1738	-5.00077	5.71e-07	6.66e-05	Il10ra
ENSMUSG00000032122	4506.13	1.25717	0.044048	5.83848	5.27e-09	6.94e-07	Slc37a2
ENSMUSG00000032224	186.397	-1.96599	0.120267	-8.03207	9.58e-16	2.17e-13	Fam81a
ENSMUSG00000032261	4900.67	1.3618	0.0396965	9.11415	7.93e-20	2.22e-17	Sh3bgrl2
ENSMUSG00000032332	126.386	-2.23748	0.269817	-4.58638	4.51e-06	0.000474582	Col12a1
ENSMUSG00000032531	24.159	-3.778	0.587094	-4.73178	2.23e-06	0.000241681	Amotl2
ENSMUSG00000032698	4828.23	-1.13875	0.0375536	-3.69483	0.000220034	0.0175469	Lmo2
ENSMUSG00000032715	599.186	-1.75036	0.10327	-7.26599	3.7e-13	6.87e-11	Trib3
ENSMUSG00000032875	27.0398	-2.70292	0.466526	-3.65021	0.000262027	0.0205741	Arhgef17
ENSMUSG00000032997	972.507	1.28164	0.0758887	3.71124	0.000206243	0.0165116	Chpf
ENSMUSG00000033170	64.2869	-3.64659	0.350057	-7.56046	4.02e-14	8.04e-12	Card10
ENSMUSG00000033192	1051.3	1.38153	0.0688485	5.54157	3e-08	3.8e-06	Lpcat2
ENSMUSG00000034783	10.2011	3.94985	0.799664	3.68886	0.000225263	0.0178246	Cd207
ENSMUSG00000034957	115.675	-2.12721	0.199867	-5.63977	1.7e-08	2.19e-06	Cebpa
ENSMUSG00000034959	343.518	-1.91637	0.117733	-7.78343	7.06e-15	1.49e-12	Rubcnl
ENSMUSG00000035004	2235.04	1.65368	0.0593275	11.0182	3.12e-28	1.45e-25	Igsf6
ENSMUSG00000035279	115.551	2.10623	0.189671	5.83239	5.46e-09	7.15e-07	Ssc5d
ENSMUSG00000035299	1018.11	1.45823	0.0781088	5.8666	4.45e-09	6.01e-07	Mid1
ENSMUSG00000035352	517.132	3.68557	0.235322	11.4124	3.63e-30	1.81e-27	Ccl12
ENSMUSG00000035373	2493.27	3.41369	0.0839629	28.7471	9.84e-182	1e-177	Ccl7
ENSMUSG00000035385	11233.5	2.82882	0.0590173	30.9879	7.84e-211	1.6e-206	Ccl2
ENSMUSG00000035835	337.086	-2.56525	0.120807	-12.9566	2.15e-38	1.26e-35	Plppr3
ENSMUSG00000036086	8017.26	1.77617	0.0481646	16.1151	2e-58	2.04e-55	Zranb3
ENSMUSG00000036526	241.029	-1.94674	0.135775	-6.97282	3.11e-12	5.24e-10	Card11
ENSMUSG00000036564	1594.9	2.18243	0.0500271	23.6357	1.66e-123	6.76e-120	Ndrg4
ENSMUSG00000037217	330.776	1.73692	0.125792	5.85824	4.68e-09	6.28e-07	Syn1
ENSMUSG00000037260	3524.02	1.61377	0.0623204	9.84862	6.95e-23	2.36e-20	Hgsnat
ENSMUSG00000037362	109.555	1.79147	0.224778	3.5211	0.00042976	0.0320203	Ccn3
ENSMUSG00000037731	468.386	-2.38262	0.133476	-10.3586	3.83e-25	1.56e-22	Themis2
ENSMUSG00000037788	1181.99	1.28427	0.0656292	4.33149	1.48e-05	0.00144668	Vopp1
ENSMUSG00000038094	189.408	3.27595	0.372064	6.11709	9.53e-10	1.36e-07	Atp13a4
ENSMUSG00000038204	142.54	-3.51039	0.221707	-11.323	1.01e-29	4.91e-27	Asb10
ENSMUSG00000038508	2970.07	2.44625	0.0750726	19.2647	1.06e-82	1.81e-79	Gdf15
ENSMUSG00000038729	183.444	2.22495	0.268985	4.55398	5.26e-06	0.000545508	Pakap
ENSMUSG00000038886	1873.16	-1.67195	0.0611066	-10.9964	3.98e-28	1.8e-25	Man2a2
ENSMUSG00000039007	84.908	3.24719	0.279505	8.03991	8.99e-16	2.06e-13	Cpq
ENSMUSG00000039109	115.575	-2.6225	0.220399	-7.36164	1.82e-13	3.5e-11	F13a1
ENSMUSG00000039168	2844.57	1.25396	0.0477425	5.3193	1.04e-07	1.27e-05	Dap
ENSMUSG00000039195	970.587	1.62156	0.0782905	7.93914	2.04e-15	4.52e-13	1110008P14Rik
ENSMUSG00000039616	59.5282	1.96932	0.283687	3.41686	0.000633475	0.0458596	Mocos
ENSMUSG00000039956	138.297	3.1323	0.208412	10.2311	1.44e-24	5.65e-22	Mrap
ENSMUSG00000040165	879.425	-1.43256	0.0743558	-5.81746	5.98e-09	7.77e-07	Cd209c
ENSMUSG00000040276	544.334	-2.33252	0.156525	-8.51314	1.69e-17	4.32e-15	Pacsin1
ENSMUSG00000040616	426.98	-1.6878	0.106544	-6.45558	1.08e-10	1.61e-08	Tmem51
ENSMUSG00000040618	2017.82	-1.58189	0.0825978	-7.04486	1.86e-12	3.24e-10	Pck2
ENSMUSG00000040829	121.325	2.63263	0.298027	5.47813	4.3e-08	5.38e-06	Zmynd15
ENSMUSG00000041075	1594.22	-1.55353	0.0619301	-8.93796	3.96e-19	1.09e-16	Fzd7
ENSMUSG00000041481	4218.33	-1.98859	0.182784	-5.40849	6.36e-08	7.86e-06	Serpina3g
ENSMUSG00000041734	446.175	-1.40833	0.103674	-3.93859	8.2e-05	0.0070304	Kirrel
ENSMUSG00000041757	186.417	-1.68636	0.197897	-3.46829	0.00052379	0.0381899	Plekha6
ENSMUSG00000041801	896.48	1.97906	0.0844059	11.5994	4.15e-31	2.12e-28	Phlda3
ENSMUSG00000042155	275.221	-2.126	0.154264	-7.29919	2.9e-13	5.42e-11	Klhl23
ENSMUSG00000042216	2196.78	1.30004	0.0577196	5.19826	2.01e-07	2.39e-05	Sgsm1
ENSMUSG00000042351	400.051	2.2799	0.129557	9.87906	5.13e-23	1.81e-20	Grap2
ENSMUSG00000043811	34.9634	2.71322	0.409619	4.18247	2.88e-05	0.0026759	Rtn4r
ENSMUSG00000043953	121.715	-2.23643	0.310134	-3.98677	6.7e-05	0.0058939	Ccrl2
ENSMUSG00000044716	731.515	2.28809	0.130539	9.86746	5.76e-23	1.99e-20	Dok7
ENSMUSG00000045658	2439.06	1.34242	0.0481944	7.10491	1.2e-12	2.14e-10	Pid1
ENSMUSG00000045667	30.638	-3.68109	0.557948	-4.80527	1.55e-06	0.0001724	Smtnl2
ENSMUSG00000046794	545.124	-1.71384	0.114253	-6.24783	4.16e-10	6.16e-08	Ppp1r3b
ENSMUSG00000047604	68.9835	-2.1455	0.23032	-4.9735	6.58e-07	7.58e-05	Frat2
ENSMUSG00000047875	501.664	-1.62166	0.104473	-5.95045	2.67e-09	3.71e-07	Gpr157
ENSMUSG00000048142	39.6075	-2.73589	0.332249	-5.22466	1.74e-07	2.1e-05	Nat8l
ENSMUSG00000048376	168.994	-1.77534	0.173707	-4.46349	8.06e-06	0.000818986	F2r
ENSMUSG00000048752	1972.08	4.43535	0.131305	26.1631	6.99e-151	4.76e-147	Prss50
ENSMUSG00000049037	42.8699	2.47341	0.278349	5.29338	1.2e-07	1.46e-05	Clec4a1
ENSMUSG00000049130	1858.93	1.78953	0.0802514	9.83816	7.71e-23	2.58e-20	C5ar1
ENSMUSG00000049719	1120.02	2.60405	0.0771867	20.7814	6.38e-96	1.86e-92	Prss46
ENSMUSG00000049744	104.654	-3.1624	0.291632	-7.41483	1.22e-13	2.39e-11	Arhgap15
ENSMUSG00000049988	957.634	1.68924	0.0724508	9.51323	1.85e-21	5.72e-19	Lrrc25
ENSMUSG00000050022	99.2	-3.27798	0.274695	-8.29276	1.11e-16	2.69e-14	Amz1
ENSMUSG00000050232	49.586	2.69459	0.251435	6.73967	1.59e-11	2.55e-09	Cxcr3
ENSMUSG00000050439	129.037	2.7448	0.201525	8.65797	4.8e-18	1.26e-15	Enthd1
ENSMUSG00000050549	917.745	-1.24048	0.0620919	-3.873	0.000107505	0.00903179	Fam241a
ENSMUSG00000050558	322.615	2.2675	0.21648	5.85505	4.77e-09	6.36e-07	Prokr2
ENSMUSG00000050711	61.1617	3.84486	0.337749	8.42299	3.67e-17	9.25e-15	Scg2
ENSMUSG00000050914	177.41	-2.47829	0.142174	-10.3978	2.54e-25	1.06e-22	Ankrd37
ENSMUSG00000051439	8719.35	1.80342	0.0515001	15.6005	7.23e-55	6.41e-52	Cd14
ENSMUSG00000051457	224.734	-2.8328	0.175512	-10.4426	1.58e-25	6.74e-23	Spn
ENSMUSG00000051537	39.7506	-2.02778	0.289521	-3.54993	0.000385328	0.0289209	Gm5124
ENSMUSG00000052364	76.867	-1.76155	0.209907	-3.62803	0.000285591	0.0222532	B630019K06Rik
ENSMUSG00000052373	32.2	-2.5802	0.415963	-3.79889	0.000145346	0.0118689	Mpp3
ENSMUSG00000052485	88.2756	2.14793	0.312555	3.67271	0.000239988	0.0189164	Tmem171
ENSMUSG00000053063	506.853	3.16889	0.141032	15.3788	2.27e-53	1.93e-50	Clec12a
ENSMUSG00000053687	489.094	1.47163	0.107389	4.39178	1.12e-05	0.0011251	Dpep2
ENSMUSG00000054342	172.04	-2.31445	0.16236	-8.09592	5.68e-16	1.32e-13	Kcnn4
ENSMUSG00000054423	344.542	1.56789	0.113411	5.00736	5.52e-07	6.47e-05	Cadps
ENSMUSG00000054976	294.518	3.71074	0.251769	10.7668	4.94e-27	2.15e-24	Nyap2
ENSMUSG00000055435	592.686	-1.74527	0.0961411	-7.75178	9.06e-15	1.89e-12	Maf
ENSMUSG00000055782	110.686	-2.33053	0.243244	-5.46993	4.5e-08	5.6e-06	Abcd2
ENSMUSG00000057315	84.6689	-2.83217	0.232092	-7.89415	2.92e-15	6.35e-13	Arhgap24
ENSMUSG00000057914	159.735	1.77854	0.222178	3.50414	0.000458087	0.0338835	Cacnb2
ENSMUSG00000058254	1987.02	1.48504	0.0508694	9.53508	1.5e-21	4.7e-19	Tspan7
ENSMUSG00000058427	1153.5	2.63068	0.100095	16.2914	1.14e-59	1.22e-56	Cxcl2
ENSMUSG00000058624	1696.06	1.61394	0.0618409	9.92775	3.15e-23	1.13e-20	Gda
ENSMUSG00000058897	19.4325	-3.03205	0.489366	-4.15242	3.29e-05	0.00301172	Col25a1
ENSMUSG00000059412	3042.76	1.67957	0.0866052	7.84679	4.27e-15	9.17e-13	Fxyd2
ENSMUSG00000059900	172.94	2.84106	0.178238	10.3292	5.2e-25	2.08e-22	Tmem40
ENSMUSG00000061578	269.839	-1.5853	0.136652	-4.28312	1.84e-05	0.00178305	Ksr2
ENSMUSG00000061603	101.761	2.10115	0.262216	4.19939	2.68e-05	0.00250635	Akap6
ENSMUSG00000062121	108.078	-3.65348	0.273136	-9.71486	2.61e-22	8.44e-20	Olfr149
ENSMUSG00000062309	31.7119	-2.66518	0.392986	-4.23725	2.26e-05	0.00215856	Rpp25
ENSMUSG00000062380	400.671	-1.88522	0.19807	-4.46921	7.85e-06	0.000801369	Tubb3
ENSMUSG00000063382	785.683	-1.44901	0.096768	-4.64009	3.48e-06	0.000374203	Bcl9l
ENSMUSG00000063531	763.645	1.62243	0.0999117	6.22984	4.67e-10	6.81e-08	Sema3e
ENSMUSG00000063954	178.832	2.72235	0.170188	10.1203	4.49e-24	1.73e-21	H2ac19
ENSMUSG00000064023	41.0466	-2.82811	0.373948	-4.88866	1.02e-06	0.000115786	Klk8
ENSMUSG00000067199	40.3645	-2.44364	0.341887	-4.22255	2.42e-05	0.00229362	Frat1
ENSMUSG00000068113	10.1537	-4.20222	0.942319	-3.39823	0.000678224	0.0489256	Gm4907
ENSMUSG00000068747	814.138	-1.29445	0.0747895	-3.93708	8.25e-05	0.00704514	Sort1
ENSMUSG00000069516	99106.1	1.76521	0.0527988	14.4929	1.34e-47	9.84e-45	Lyz2
ENSMUSG00000069792	649.323	-1.51605	0.0861461	-5.99037	2.09e-09	2.95e-07	Wfdc17
ENSMUSG00000070691	710.521	-1.39852	0.114196	-3.48984	0.000483312	0.0356203	Runx3
ENSMUSG00000071068	247.45	-2.93626	0.17542	-11.0378	2.51e-28	1.19e-25	Treml2
ENSMUSG00000071540	61.2656	-3.99443	0.459258	-6.52016	7.02e-11	1.07e-08	3425401B19Rik
ENSMUSG00000071714	2501.01	1.33128	0.0590929	5.60614	2.07e-08	2.64e-06	Csf2rb2
ENSMUSG00000073530	26.6801	2.68222	0.470188	3.57776	0.000346547	0.0264956	Pappa2
ENSMUSG00000073591	59.6978	2.32586	0.327808	4.04461	5.24e-05	0.00467223	Pcdhb22
ENSMUSG00000075122	572.229	1.42165	0.0972331	4.3365	1.45e-05	0.00142091	Cd80
ENSMUSG00000075271	62.8021	-2.13489	0.260188	-4.3618	1.29e-05	0.00127222	Ttc30a1
ENSMUSG00000075705	2968.72	1.41669	0.0537911	7.74648	9.45e-15	1.95e-12	Msrb1
ENSMUSG00000078566	4034.16	-1.48067	0.0817659	-5.87867	4.14e-09	5.63e-07	Bnip3
ENSMUSG00000079499	91.837	-1.95131	0.274173	-3.46972	0.000520994	0.0381222	6530402F18Rik
ENSMUSG00000079625	119.013	2.02426	0.207406	4.93842	7.88e-07	9.03e-05	Tm4sf19
ENSMUSG00000082593	86.1676	-1.96069	0.249833	-3.84531	0.000120399	0.0100324	NA
ENSMUSG00000085957	76.1699	-3.49039	0.307217	-8.10632	5.22e-16	1.22e-13	Syna
ENSMUSG00000087006	252.769	-2.09647	0.134717	-8.13908	3.98e-16	9.46e-14	Gm13889
ENSMUSG00000090698	111.005	-2.6024	0.180667	-8.86938	7.36e-19	2e-16	Apold1
ENSMUSG00000093738	129.516	2.49962	0.192518	7.7895	6.73e-15	1.43e-12	AI606473
ENSMUSG00000094986	31.4878	2.64786	0.416362	3.95775	7.57e-05	0.00651727	Olfr1454
ENSMUSG00000095101	29.277	-3.95562	0.61885	-4.77598	1.79e-06	0.000196787	Gm13285
ENSMUSG00000095620	130.574	2.63734	0.433751	3.77483	0.000160114	0.0129712	Csta2
ENSMUSG00000095959	340.781	-1.98634	0.103754	-9.50652	1.97e-21	6.01e-19	Gm10845
ENSMUSG00000096225	126.643	2.86484	0.258211	7.22213	5.12e-13	9.41e-11	Lhx8
ENSMUSG00000097694	1337.95	1.44329	0.0711738	6.22821	4.72e-10	6.83e-08	G730013B05Rik
ENSMUSG00000102712	136.413	-2.00073	0.234128	-4.27429	1.92e-05	0.00183779	NA
ENSMUSG00000103182	197.125	-1.63872	0.132094	-4.83533	1.33e-06	0.000149926	NA
ENSMUSG00000104080	597.537	-2.68647	0.097349	-17.324	3.1e-67	4.22e-64	NA
ENSMUSG00000105134	3454.01	-1.56377	0.091901	-6.13456	8.54e-10	1.23e-07	NA
ENSMUSG00000105270	461.694	-2.18821	0.142514	-8.33748	7.59e-17	1.87e-14	NA
ENSMUSG00000106549	2247.73	-1.43286	0.104133	-4.15677	3.23e-05	0.00296821	NA
ENSMUSG00000106714	2950.2	-1.55049	0.0915474	-6.01317	1.82e-09	2.58e-07	NA
ENSMUSG00000107306	242.5	-2.24652	0.134315	-9.28058	1.69e-20	4.85e-18	NA
ENSMUSG00000107495	696.515	-1.58227	0.0737479	-7.89535	2.89e-15	6.35e-13	NA
ENSMUSG00000107699	1121.67	-1.80454	0.0603707	-13.3267	1.62e-40	1e-37	NA
ENSMUSG00000108161	55.8105	-2.28193	0.249783	-5.13218	2.86e-07	3.38e-05	NA
ENSMUSG00000108218	4298.92	-1.43668	0.0592609	-7.36875	1.72e-13	3.35e-11	NA
ENSMUSG00000109846	382.855	-2.06786	0.0977955	-10.9193	9.32e-28	4.14e-25	NA
ENSMUSG00000113424	2008.93	-1.40977	0.0605043	-6.7725	1.27e-11	2.05e-09	NA
ENSMUSG00000113553	28.9816	2.56443	0.435947	3.58857	0.000332492	0.0255181	NA
ENSMUSG00000113817	14.5341	6.6523	1.13609	4.97524	6.52e-07	7.56e-05	NA
ENSMUSG00000114372	38.5181	-2.46104	0.337777	-4.32547	1.52e-05	0.00147967	NA
ENSMUSG00000115775	29.0172	-2.29055	0.371845	-3.47066	0.000519182	0.0381222	NA
ENSMUSG00000115971	12.161	-3.30558	0.642245	-3.58987	0.000330838	0.025487	NA
ENSMUSG00000116692	70.0947	-1.94852	0.207768	-4.56527	4.99e-06	0.000522259	NA
ENSMUSG00000118607	430.438	1.94291	0.138856	6.79058	1.12e-11	1.82e-09	NA

## Sheet: DESEQ2 IFNg GSK3b v NTC
id	baseMean	log2FoldChange	lfcSE	stat	pvalue	padj	symbol
ENSMUSG00000000982	15686.1	1.7613	0.0866019	8.79076	1.49e-18	2.53e-15	Ccl3
ENSMUSG00000001270	17209.8	1.46719	0.0823043	5.67637	1.38e-08	7.54e-06	Ckb
ENSMUSG00000001507	343.793	1.88152	0.213358	4.13163	3.6e-05	0.00900506	Itga3
ENSMUSG00000002250	1060.4	1.56222	0.108418	5.18572	2.15e-07	8.71e-05	Ppard
ENSMUSG00000004267	725.265	1.55205	0.132839	4.15574	3.24e-05	0.00835147	Eno2
ENSMUSG00000005045	150.959	2.77415	0.336214	5.27685	1.31e-07	5.73e-05	Chd5
ENSMUSG00000005125	1797.77	2.94187	0.197503	9.83212	8.19e-23	3.48e-19	Ndrg1
ENSMUSG00000005800	160.986	2.08208	0.222917	4.85417	1.21e-06	0.000456707	Mmp8
ENSMUSG00000006398	4072.66	-1.43715	0.0781366	-5.59474	2.21e-08	1.14e-05	Cdc20
ENSMUSG00000006567	86.9893	2.41135	0.351722	4.01267	6e-05	0.013937	Atp7b
ENSMUSG00000007872	563.951	-3.25697	0.235891	-9.56788	1.09e-21	2.32e-18	Id3
ENSMUSG00000014813	388.583	2.02634	0.148532	6.90989	4.85e-12	4.12e-09	Stc1
ENSMUSG00000015980	848.094	1.61139	0.133574	4.57717	4.71e-06	0.00138141	Lrrc27
ENSMUSG00000017314	53.705	3.77087	0.465691	5.95001	2.68e-09	1.63e-06	Mpp2
ENSMUSG00000018648	139.963	2.09345	0.270396	4.04387	5.26e-05	0.0125884	Dusp14
ENSMUSG00000018906	293.146	2.38611	0.186547	7.43036	1.08e-13	1.15e-10	P4ha2
ENSMUSG00000020432	732.299	1.63146	0.134797	4.68452	2.81e-06	0.000883437	Tcn2
ENSMUSG00000020601	175.479	2.08355	0.272897	3.97054	7.17e-05	0.0160401	Trib2
ENSMUSG00000020689	4189.11	1.96808	0.100238	9.65786	4.55e-22	1.29e-18	Itgb3
ENSMUSG00000020826	1126.06	3.08427	0.448965	4.6424	3.44e-06	0.00106446	Nos2
ENSMUSG00000023951	2781.44	1.82392	0.130976	6.29063	3.16e-10	2.07e-07	Vegfa
ENSMUSG00000024210	44.1088	3.61807	0.482849	5.42213	5.89e-08	2.78e-05	Ip6k3
ENSMUSG00000024610	14167.6	-2.579	0.0759797	-20.7819	6.31e-96	1.07e-91	Cd74
ENSMUSG00000025329	982.363	1.77544	0.12045	6.43786	1.21e-10	8.24e-08	Padi1
ENSMUSG00000025804	307.88	2.03669	0.2149	4.82404	1.41e-06	0.000508845	Ccr1
ENSMUSG00000026390	324.068	-1.94202	0.168889	-5.57773	2.44e-08	1.22e-05	Marco
ENSMUSG00000026725	19.9895	-3.93815	0.694392	-4.23125	2.32e-05	0.00610708	Tnn
ENSMUSG00000027333	2511.87	1.33038	0.08151	4.0532	5.05e-05	0.0122698	Smox
ENSMUSG00000027562	331.106	1.77043	0.204943	3.75922	0.000170445	0.0329269	Car2
ENSMUSG00000027995	8168.08	-1.45034	0.0514516	-8.75274	2.08e-18	3.22e-15	Tlr2
ENSMUSG00000028583	777.472	1.76097	0.194288	3.91673	8.98e-05	0.0192025	Pdpn
ENSMUSG00000028654	54.7272	-3.55101	0.407232	-6.26428	3.75e-10	2.36e-07	Mycl
ENSMUSG00000028751	57.6496	2.61043	0.398893	4.03724	5.41e-05	0.0127698	Pla2g2e
ENSMUSG00000028834	360.803	1.89012	0.188159	4.73067	2.24e-06	0.000745924	Trim63
ENSMUSG00000029304	135168	1.36589	0.0695466	5.26103	1.43e-07	6.09e-05	Spp1
ENSMUSG00000029385	384.725	1.78702	0.189588	4.15122	3.31e-05	0.00839108	Ccng2
ENSMUSG00000030103	2200.58	1.55016	0.069188	7.95164	1.84e-15	2.61e-12	Bhlhe40
ENSMUSG00000030137	809.497	1.99182	0.134627	7.3672	1.74e-13	1.65e-10	Tuba8
ENSMUSG00000030409	283.248	-2.39891	0.246943	-5.66489	1.47e-08	7.82e-06	Dmpk
ENSMUSG00000030530	2080.04	1.43031	0.11155	3.85752	0.000114544	0.0234609	Furin
ENSMUSG00000030790	139.915	3.23495	0.384065	5.81919	5.91e-09	3.35e-06	Adm
ENSMUSG00000031565	725.515	1.44515	0.116834	3.81013	0.000138897	0.0274563	Fgfr1
ENSMUSG00000032238	270.642	2.1038	0.281933	3.91511	9.04e-05	0.0192025	Rora
ENSMUSG00000032332	126.386	3.31707	0.391027	5.9256	3.11e-09	1.82e-06	Col12a1
ENSMUSG00000033170	64.2869	3.00167	0.468239	4.27489	1.91e-05	0.00516021	Card10
ENSMUSG00000034059	19.1374	3.76122	0.698249	3.9545	7.67e-05	0.0167159	Ypel4
ENSMUSG00000034612	2961.51	1.51656	0.0682696	7.56653	3.83e-14	4.34e-11	Chst11
ENSMUSG00000034641	1142.89	1.46916	0.100068	4.6884	2.75e-06	0.000883196	Cd300ld
ENSMUSG00000035105	1417.57	1.59213	0.0904722	6.54493	5.95e-11	4.4e-08	Egln3
ENSMUSG00000035493	62.4191	-2.40744	0.343849	-4.09319	4.25e-05	0.0104829	Tgfbi
ENSMUSG00000036002	255.497	1.7561	0.195607	3.86539	0.000110913	0.023278	Fam214b
ENSMUSG00000036103	6488.71	1.39596	0.060803	6.51215	7.41e-11	5.25e-08	Colec12
ENSMUSG00000037139	233.052	2.74313	0.236102	7.38296	1.55e-13	1.55e-10	Myom3
ENSMUSG00000037260	3524.02	1.41182	0.0869712	4.73515	2.19e-06	0.000744238	Hgsnat
ENSMUSG00000037411	274.183	1.88395	0.165705	5.33449	9.58e-08	4.29e-05	Serpine1
ENSMUSG00000038319	23.1966	3.67062	0.581464	4.59291	4.37e-06	0.00130363	Kcnh2
ENSMUSG00000038515	407.355	2.41068	0.144053	9.79277	1.21e-22	4.11e-19	Grtp1
ENSMUSG00000039474	2656.45	1.28965	0.0722291	4.0102	6.07e-05	0.013937	Wfs1
ENSMUSG00000039865	14.4559	6.54986	1.28331	4.32465	1.53e-05	0.0042576	Slc44a3
ENSMUSG00000042745	659.304	-1.58982	0.110108	-5.35669	8.48e-08	3.89e-05	Id1
ENSMUSG00000043421	988.217	1.35152	0.0962709	3.65138	0.000260833	0.0492684	Hilpda
ENSMUSG00000046318	441.74	1.52562	0.139808	3.75958	0.000170197	0.0329269	Ccbe1
ENSMUSG00000046794	545.124	2.25235	0.160179	7.81842	5.35e-15	6.99e-12	Ppp1r3b
ENSMUSG00000047205	531.285	1.54236	0.128213	4.23018	2.34e-05	0.00610708	Dusp18
ENSMUSG00000048965	220.46	1.63099	0.163545	3.85821	0.000114219	0.0234609	Mrgpre
ENSMUSG00000049719	1120.02	1.57326	0.118212	4.84941	1.24e-06	0.000457639	Prss46
ENSMUSG00000049723	8633.12	2.186	0.0798313	14.8563	6.33e-50	5.38e-46	Mmp12
ENSMUSG00000050558	322.615	2.39633	0.315461	4.42633	9.58e-06	0.00271574	Prokr2
ENSMUSG00000050578	594.016	2.24492	0.16158	7.70465	1.31e-14	1.59e-11	Mmp13
ENSMUSG00000053063	506.853	-3.17033	0.174836	-12.4135	2.21e-35	1.25e-31	Clec12a
ENSMUSG00000053192	998.176	1.48035	0.104198	4.60995	4.03e-06	0.00122269	Mllt11
ENSMUSG00000054008	4020.95	1.52849	0.133558	3.95703	7.59e-05	0.0167159	Ndst1
ENSMUSG00000054871	1835.83	1.72375	0.110341	6.55915	5.41e-11	4.18e-08	Tmem158
ENSMUSG00000055322	351.608	2.38769	0.362685	3.82616	0.000130155	0.0263047	Tns1
ENSMUSG00000056054	468.013	2.02482	0.238367	4.29933	1.71e-05	0.00469727	S100a8
ENSMUSG00000057137	355.163	1.8799	0.185194	4.7512	2.02e-06	0.000701569	Tmem140
ENSMUSG00000062157	55.3651	2.64135	0.363834	4.51128	6.44e-06	0.00185671	Ifnlr1
ENSMUSG00000062515	3718.87	1.72769	0.101139	7.19495	6.25e-13	5.59e-10	Fabp4
ENSMUSG00000063564	2364.15	1.51483	0.0989441	5.20325	1.96e-07	8.12e-05	Col23a1
ENSMUSG00000066621	6424.9	1.49767	0.0755764	6.58505	4.55e-11	3.68e-08	Tecpr1
ENSMUSG00000072235	4003.98	1.28858	0.0726563	3.97189	7.13e-05	0.0160401	Tuba1a
ENSMUSG00000073421	1878.09	-2.64176	0.170629	-9.62183	6.47e-22	1.57e-18	H2-Ab1
ENSMUSG00000078566	4034.16	2.02472	0.11511	8.9021	5.48e-19	1.04e-15	Bnip3
ENSMUSG00000079018	547.955	2.56399	0.308881	5.06341	4.12e-07	0.000162816	Ly6c1
ENSMUSG00000087006	252.769	1.97786	0.204575	4.77997	1.75e-06	0.000620928	Gm13889
ENSMUSG00000102224	195.737	2.63215	0.32961	4.95178	7.35e-07	0.000284124	4930447F24Rik
ENSMUSG00000107546	113.482	2.08613	0.28406	3.82359	0.000131523	0.0263047	NA
ENSMUSG00000108161	55.8105	3.05537	0.368848	5.57241	2.51e-08	1.22e-05	NA
ENSMUSG00000116957	122.359	2.43335	0.305368	4.69383	2.68e-06	0.000876601	NA
ENSMUSG00000117399	19.9588	3.1525	0.573361	3.75417	0.000173917	0.0332202	Gm19689

## Sheet: DESEQ2 IFNg Med16 v NTC
id	baseMean	log2FoldChange	lfcSE	stat	pvalue	padj	symbol
ENSMUSG00000000594	1455.15	-1.57498	0.0836022	-6.8776	6.09e-12	4.55e-09	Gm2a
ENSMUSG00000000791	1035.05	-2.90268	0.221571	-8.58722	8.91e-18	9.76e-15	Il12rb1
ENSMUSG00000001552	441.095	-2.32362	0.191147	-6.92463	4.37e-12	3.42e-09	Jup
ENSMUSG00000002602	457.084	-1.663	0.16184	-4.09663	4.19e-05	0.0118749	Axl
ENSMUSG00000002944	5543.22	-1.29229	0.078674	-3.71518	0.00020306	0.0483519	Cd36
ENSMUSG00000005800	160.986	2.88505	0.227731	8.27754	1.26e-16	1.22e-13	Mmp8
ENSMUSG00000014813	388.583	1.61613	0.145977	4.22077	2.43e-05	0.00714325	Stc1
ENSMUSG00000015396	649.219	-1.70425	0.0986715	-7.13727	9.52e-13	7.82e-10	Cd83
ENSMUSG00000018920	290.265	-1.80191	0.207222	-3.8698	0.000108925	0.0275329	Cxcl16
ENSMUSG00000018927	610.607	-2.06023	0.214753	-4.93695	7.94e-07	0.000334301	Ccl6
ENSMUSG00000021262	218.007	-2.94563	0.497972	-3.90711	9.34e-05	0.0243597	Evl
ENSMUSG00000021367	403.471	-3.78832	0.653052	-4.26968	1.96e-05	0.00606848	Edn1
ENSMUSG00000021990	1062.41	1.49577	0.118839	4.17173	3.02e-05	0.00871347	Spata13
ENSMUSG00000022303	199.049	-2.45489	0.257102	-5.65878	1.52e-08	8.08e-06	Dcstamp
ENSMUSG00000022504	657.706	-2.8128	0.414175	-4.37691	1.2e-05	0.00394309	Ciita
ENSMUSG00000024610	14167.6	-3.81647	0.0764912	-36.8208	8.57e-297	1.41e-292	Cd74
ENSMUSG00000024679	1193.39	1.5269	0.0928729	5.67334	1.4e-08	7.67e-06	Ms4a6d
ENSMUSG00000024810	59.3374	-4.8056	0.785834	-4.84275	1.28e-06	0.000489287	Il33
ENSMUSG00000026068	504.161	2.46888	0.155512	9.44543	3.54e-21	4.15e-18	Il18rap
ENSMUSG00000026358	1507.09	-1.90376	0.136117	-6.63954	3.15e-11	2.07e-08	Rgs1
ENSMUSG00000026725	19.9895	-6.05545	0.969564	-5.21415	1.85e-07	8.2e-05	Tnn
ENSMUSG00000027500	5.20434	-11.6316	2.68353	-3.96181	7.44e-05	0.020369	Stmn2
ENSMUSG00000027670	1754.83	-2.28242	0.103033	-12.4467	1.46e-35	3.42e-32	Ocstamp
ENSMUSG00000028019	140.492	-2.1173	0.260827	-4.2837	1.84e-05	0.00580767	Pdgfc
ENSMUSG00000028517	753.82	1.56484	0.121954	4.63155	3.63e-06	0.00132515	Plpp3
ENSMUSG00000028542	618.16	-1.63589	0.128066	-4.9653	6.86e-07	0.00029658	Slc6a9
ENSMUSG00000028654	54.7272	-2.62207	0.417284	-3.88721	0.000101401	0.0260315	Mycl
ENSMUSG00000029860	2657.36	-1.60125	0.0946384	-6.35314	2.11e-10	1.24e-07	Zyx
ENSMUSG00000029925	340.924	-3.60863	0.490935	-5.3136	1.07e-07	4.91e-05	Tbxas1
ENSMUSG00000030055	903.451	-1.93605	0.205609	-4.55256	5.3e-06	0.00185268	Rab43
ENSMUSG00000031779	568.509	-5.12262	0.266314	-15.4803	4.71e-54	1.94e-50	Ccl22
ENSMUSG00000032487	4173.44	-2.41651	0.0976488	-14.5062	1.11e-47	3.03e-44	Ptgs2
ENSMUSG00000033082	26.7577	-5.28793	0.883305	-4.85441	1.21e-06	0.00048386	Clec1a
ENSMUSG00000033730	430.235	-2.00233	0.206912	-4.84421	1.27e-06	0.000489287	Egr3
ENSMUSG00000034271	610.97	-1.97877	0.120021	-8.15496	3.49e-16	3.19e-13	Jdp2
ENSMUSG00000034438	503.082	-2.06593	0.251161	-4.244	2.2e-05	0.00655904	Gbp8
ENSMUSG00000036594	1085.74	-6.07401	0.42892	-11.8297	2.74e-32	5e-29	H2-Aa
ENSMUSG00000037411	274.183	1.98437	0.156732	6.28059	3.37e-10	1.91e-07	Serpine1
ENSMUSG00000037649	509.453	-3.31885	0.211333	-10.9725	5.18e-28	8.52e-25	H2-DMa
ENSMUSG00000037664	1310.44	-1.70414	0.108159	-6.51022	7.5e-11	4.57e-08	Cdkn1c
ENSMUSG00000040276	544.334	2.04675	0.194314	5.38689	7.17e-08	3.46e-05	Pacsin1
ENSMUSG00000040552	3054.59	1.47548	0.0889921	5.34297	9.14e-08	4.29e-05	C3ar1
ENSMUSG00000040751	3031.96	-1.48769	0.114382	-4.26371	2.01e-05	0.00611738	Lat2
ENSMUSG00000046080	425.407	-7.25097	1.11226	-5.62006	1.91e-08	9.8e-06	Clec9a
ENSMUSG00000046805	6775.23	1.47513	0.0718581	6.61201	3.79e-11	2.4e-08	Mpeg1
ENSMUSG00000046997	362.73	1.59926	0.158423	3.78265	0.000155168	0.0380509	Spsb4
ENSMUSG00000048120	1391.4	-1.63985	0.14631	-4.37327	1.22e-05	0.00394309	Entpd1
ENSMUSG00000049719	1120.02	2.04176	0.124315	8.38005	5.29e-17	5.43e-14	Prss46
ENSMUSG00000049723	8633.12	1.81361	0.0820563	9.91521	3.58e-23	4.89e-20	Mmp12
ENSMUSG00000050064	15.218	3.92721	0.783821	3.73454	0.000188061	0.0454388	Zfp697
ENSMUSG00000050395	160.579	-4.11727	0.573042	-5.43986	5.33e-08	2.65e-05	Tnfsf15
ENSMUSG00000051124	81.6876	-2.19707	0.309833	-3.8636	0.00011173	0.0278141	Gimap9
ENSMUSG00000051439	8719.35	1.29833	0.0736435	4.051	5.1e-05	0.0142022	Cd14
ENSMUSG00000052415	760.105	-5.46623	0.205576	-21.7254	1.18e-104	9.69e-101	Tchh
ENSMUSG00000053063	506.853	-2.29035	0.179203	-7.20051	6e-13	5.19e-10	Clec12a
ENSMUSG00000053113	1216.58	1.9455	0.0904385	10.4546	1.4e-25	2.08e-22	Socs3
ENSMUSG00000055561	32.5687	2.71987	0.437403	3.93202	8.42e-05	0.0223226	Spink5
ENSMUSG00000057706	97.0376	-3.31511	0.338648	-6.83632	8.13e-12	5.8e-09	Mex3b
ENSMUSG00000058624	1696.06	2.28082	0.0867025	14.7725	2.2e-49	7.24e-46	Gda
ENSMUSG00000060275	130.264	-2.26304	0.282187	-4.47588	7.61e-06	0.00255153	Nrg2
ENSMUSG00000060586	1132.05	-5.39707	0.45881	-9.58364	9.37e-22	1.18e-18	H2-Eb1
ENSMUSG00000061815	12.6192	-5.07968	1.03426	-3.94456	7.99e-05	0.0215335	Rufy4
ENSMUSG00000064215	694.486	1.60616	0.132994	4.5578	5.17e-06	0.00184633	Ifi27
ENSMUSG00000066755	370.988	-3.42553	0.356256	-6.8084	9.87e-12	6.76e-09	Tnfsf18
ENSMUSG00000073421	1878.09	-4.17001	0.191762	-16.531	2.2e-61	1.2e-57	H2-Ab1
ENSMUSG00000079547	692.342	-2.93649	0.156402	-12.3814	3.29e-35	6.77e-32	H2-DMb1
ENSMUSG00000085957	76.1699	-2.88227	0.400973	-4.69425	2.68e-06	0.000999177	Syna
ENSMUSG00000090176	81.0262	-3.45264	0.543211	-4.51509	6.33e-06	0.00216637	Cd200r2
ENSMUSG00000109061	7.82039	-10.0068	1.85169	-4.86408	1.15e-06	0.000472317	NA
